# Supplementary material for: Sorting Signals, N-Terminal Modifications and Abundance of the Chloroplast Proteome
Source: PLoS One. 2008 Apr 23;3(4):e1994. doi: 10.1371/journal.pone.0001994 (PMC2291561; doi:10.1371/journal.pone.0001994)
Supplement: Table S1 — Chloroplast proteome analysis by LTQ, identifying 1258 non-ambiguous proteins and 22 ambiguous protein groups. (0.33 MB XLS) [file pone.0001994.s002.xls]

## Sheet: suppltable1
	Supplemental Table 1. Chloroplast proteome analysis by LTQ-Orbitrap identifying 1258 non-ambiguous proteins and 22 ambiguous protein groups (each group counted as one identification).
	Accession	NumOfObserv	Lab Annot.	Amb. Group	ΣMowse	Σpeptides	Σunique SpC	Curated Loc.	TargetP	exp.ID	MapManBin
	AT1G01080.1	10	RNA-binding protein cp33		1772	24	42	plastid stroma	C	p1S(4); p3S(2); p3LM(2); p3T(1); p2S(1)	27.4 RNA.RNA binding
	AT1G01090.1	7	Plastidial Pyruvate Dehydrogenase E1alpha subunit		471	8	12	envelope-inner-peripheral-stromal-side	C	p1S(4); p2S(2); p3LM(1)	11.1.31 lipid metabolism.FA synthesis and FA elongation.pyruvate DH
	AT1G01790.1	9	K+ efflux antiporter, putitive (KEA1)		3980	44	56	plastid	_	p2S(2); p3S(2); p2T(2); p3LM(2); p3T(1)	34.15 transport.potassium
	AT1G02020.1	1	nitroreductase family protein		43	1	2		C	p1S(1)	12.4 N-metabolism.misc
	AT1G02150.1	2	pentatricopeptide (PPR) repeat-containing protein		76	2	3		M	p1S(2)	26.54* misc. Pentapeptide repeat (PPR) unknown function
	AT1G02280.1	4	Toc33		718	6	11	envelope-outer-integral	_	p3T(1); p2S(1); p2T(1); p3LM(1)	29.3.3 protein.targeting.chloroplast
	AT1G02560.1	18	ClpP5		4722	56	114	plastid stroma; thylakoid-inner-peripheral-stromal-side	C	p3S(7); p2S(3); p1S(3); p2T(2); p3LM(2); p3T(1)	29.5.5 protein.degradation.serine protease
	AT1G02910.1	3	LPA1 - PSII assembly factor		266	5	7	thylakoid-integral	C	p2T(2); p3T(1)	29.8 protein assembly and cofactor ligation
	AT1G03030.1	1	phosphoribulokinase/uridine kinase family		42	1	1		C	p3S(1)	1.3.12 PS.calvin cyle.PRK
	AT1G03160.1	3	FZL - FZO-like dynamin		1902	31	52	envelope-inner-integral; thylakoid-integral	C	p2T(2); p3T(1)	26.17 misc.dynamin
	AT1G03310.1	8	isoamylase 2 (lSA2 or DBE1)		546	14	17	plastid	C	p1S(6); p3S(1); p3LM(1)	2.1.2.4 major CHO metabolism.synthesis.starch.debranching
	AT1G03475.1	14	coproporphyrinogen III oxidase		1772	38	57	plastid stroma	C	p1S(8); p2S(3); p3S(2); p3LM(1)	19.8 tetrapyrrole synthesis.coproporphyrinogen III oxidase
	AT1G03600.1	7	PSII Lumen Tat lTP		781	9	17	thylakoid-peripheral-lumenal-side	C	p1S(3); p2T(2); p3T(1); p3LM(1)	1.1.1.2 PS.lightreaction.photosystem II.PSII polypeptide subunits
	AT1G03630.1	9	PORC- ~constitutive expression		1425	25	28	thylakoid-peripheral-stromal-side	C	p1S(4); p3T(2); p2T(2); p3LM(1)	19.14 tetrapyrrole synthesis.protochlorophyllide reductase
	AT1G03680.1	13	thioredoxin m1		2698	35	71	thylakoid-peripheral-stromal-side	C	p1S(6); p2T(2); p3LM(2); p2S(1); p3S(1); p3T(1)	21.1 redox.thioredoxin
	AT1G04410.1	3	malate dehydrogenase, cytosolic,		320	6	8	cytosol	_	p1S(2); p3S(1)	8.2.9 TCA / org. transformation.other organic acid transformaitons.cyt MDH
	AT1G04420.1	16	aldo/keto reductase family		3869	54	91	plastid stroma	C	p1S(6); p2S(3); p3S(2); p2T(2); p3LM(2); p3T(1)	3.5 minor CHO metabolism.others
	AT1G05140.1	1	membrane-associated zinc metalloprotease, putative		298	4	1		C	p3T(1)	29.5.7 protein.degradation.metalloprotease
	AT1G05190.1	15	50S ribosomal protein L6p family		6897	120	211	plastid ribosome	C	p3S(4); p1S(4); p2S(2); p2T(2); p3LM(2); p3T(1)	29.2.1.1 protein.synthesis.chloroplast/mito.plastid
	AT1G05385.1	2	psb27 homologue Syn 6803 (PSII assembly)		340	4	7		C	p2T(2)	29.8 protein assembly and cofactor ligation
	AT1G06130.1	5	hydroxyacylglutathione hydrolase, putative / glyoxalase II		460	6	10	plastid stroma	C	p1S(3); p3S(1); p2S(1)	13.2.3.2 amino acid metabolism.degradation.aspartate family.threonine; 24.1 Biodegradation of Xenobiotics.hydroxyacylglutathione hydrolase
	AT1G06380.1	6	weakly similar to 60S ribosomal protein L10a. (		342	6	9		C	p2T(2); p2S(1); p3S(1); p3T(1); p3LM(1)	29.2.2 protein.synthesis.misc ribososomal protein
	AT1G06430.1	8	FtsH8 TAT lTP		6566	76	26	thylakoid-integral	C	p2T(5); p3T(2); p3S(1)	29.5.7 protein.degradation.metalloprotease
	AT1G06680.1	43	psbP OEC23 Tat lTP		14703	165	400	thylakoid-peripheral-lumenal-side	C	p3S(12); p3T(10); p2T(10); p1S(5); p2S(4); p3LM(2)	1.1.1.2 PS.lightreaction.photosystem II.PSII polypeptide subunits
	AT1G06690.1	6	aldo/keto reductase family		656	12	18	plastoglobules	C	p3T(2); p2T(2); p3S(1); p3LM(1)	35.1 not assigned.no ontology
	AT1G06950.1	15	Tic110		11073	145	253	envelope-inner-integral	C	p2T(4); p3S(3); p1S(3); p2S(2); p3LM(2); p3T(1)	29.3.3 protein.targeting.chloroplast
	AT1G07320.1	24	50S ribosomal protein L4		4929	67	115	plastid ribosome	C	p1S(9); p3S(5); p2S(4); p2T(3); p3LM(2); p3T(1)	29.2.1.1 protein.synthesis.chloroplast/mito.plastid
	AT1G07660.1	2	histone H4	1)	168	4	0	nucleus	_	p2T(2)	28.1.3 DNA.synthesis/chromatin structure.histone
	AT1G07700.1	2	thioredoxin family protein		225	4	7	plastid stroma	C	p3S(1); p2S(1)	21.1 redox.thioredoxin
	AT1G07790.1	2	histone H2B, putative	2)	360	4	0	nucleus	_	p2T(2)	28.1.3 DNA.synthesis/chromatin structure.histone
	AT1G07890.1	1	L-ascorbate peroxidase 1, cytosolic (APX1)		39	2	2	cytosol	_	p1S(1)	21.2.1 redox.ascorbate and glutathione.ascorbate
	AT1G07920.1	1	elongation factor 1-alpha / EF-1-alpha	3)	48	2	0	mitochondria	_	p2T(1)	29.2.4 protein.synthesis.elongation
	AT1G08110.1	7	glyoxalase I, putative (lactoylglutathione lyase) - very abundant		939	19	26	not plastid	_	p3S(4); p1S(2); p2S(1)	13.2.3.2 amino acid metabolism.degradation.aspartate family.threonine; 24.2 Biodegradation of Xenobiotics.lactoylglutathione lyase
	AT1G08380.1	2	psaO		314	2	4	thylakoid-integral	C	p3T(1); p3S(1)	1.1.2.2 PS.lightreaction.photosystem I.PSI polypeptide subunits
	AT1G08490.1	2	AtCpNifS or AtNSF2 - SufS-like		181	2	3	plastid stroma	C	p2S(2)	14 S-assimilation
	AT1G08520.1	19	Mg-protoporphyrin IX chelatase (CHLD)		3560	87	131	plastid	C	p1S(10); p2S(3); p3S(2); p2T(2); p3T(1); p3LM(1)	19.1 tetrapyrrole synthesis.magnesium chelatase
	AT1G08550.1	4	Violaxanthin Deepoxidase (VDE)		257	5	7	thylakoid-peripheral-lumenal-side	_	p2T(3); p3T(1)	16.1.4.21 secondary metabolism.isoprenoids.carotenoids.violaxanthin de-epoxidase
	AT1G08640.1	2	DnaJ domain family		354	5	8	plastid	C	p2S(1); p3LM(1)	26.29* misc. DnaJ domain with unknown function
	AT1G09130.1	10	ClpR3		2021	42	67	plastid stroma; thylakoid-peripheral-stromal-side	C	p1S(5); p3S(2); p3T(1); p2S(1); p3LM(1)	29.5.5 protein.degradation.serine protease
	AT1G09340.1	58	Rap38 or CSP41B		17106	232	523	plastid stroma; plastoglobules	_	p1S(19); p2S(11); p3S(10); p2T(10); p3LM(5); p3T(3)	27 RNA
	AT1G09620.1	2	Leu-tRNA synthetase		123	2	2	cytosol	_	p2S(1); p1S(1)	29.1.4 protein.aa activation. leucine-tRNA ligase
	AT1G09780.1	3	Phosphoglycerate mutase		174	3	5	cytosol	_	p1S(3)	4.11 glycolysis.phosphoglycerate mutase
	AT1G09795.1	8	ATP phosphoribosyl transferase (ATP-PRT2)		792	25	37	plastid stroma	C	p1S(5); p2S(2); p3S(1)	13.1.7.1 amino acid metabolism.synthesis.histidine.ATP phosphoribosyl transferase
	AT1G09830.1	5	phosphoribosylamine--glycine ligase (PUR2)		573	7	12	plastid stroma	C	p1S(3); p3S(2)	23.1.2.2 nucleotide metabolism.synthesis.purine.GAR Synthetase
	AT1G10370.1	1	glutathione S-transferase (ATGSTU17/ERD9/GST30/GST30B)		57	1	1		S	p1S(1)	26.9 misc.glutathione S transferases
	AT1G10510.1	2	expressed protein similar to ribonuclease inhibitors		324	4	7		C	p3T(1); p3LM(1)	33.99 development.unspecified
	AT1G10760.1	19	Sex1 - R1 protein - controls starch phosphorylation		11185	218	361	plastid stroma	C	p1S(6); p3S(5); p2S(4); p2T(2); p3T(1); p3LM(1)	2.2.2.3 major CHO metabolism.degradation.starch.glucan water dikinase
	AT1G10830.1	2	sodium symporter-related		133	2	3		C	p3T(1); p2T(1)	34.14 transport.unspecified cations
	AT1G11430.1	10	DAG protein -related		1242	19	33	plastid stroma	C	p3S(4); p2S(2); p1S(2); p3T(1); p3LM(1)	31.6* plastid differentiation
	AT1G11520.1	7	spliceosome associated protein-related		391	7	21		S	p2T(7)	27.1.1 RNA.processing.splicing
	AT1G11720.1	9	starch synthase type III		1025	18	24	plastid stroma	C	p1S(5); p2S(1); p3S(1); p2T(1); p3LM(1)	2.1.2.2 major CHO metabolism.synthesis.starch.starch synthase
	AT1G11750.1	14	ClpP6		6367	57	115	plastid stroma; thylakoid-peripheral-stromal-side	C	p3S(4); p1S(3); p2S(2); p2T(2); p3LM(2); p3T(1)	29.5.5 protein.degradation.serine protease
	AT1G11860.1	3	aminomethyltransferase-related precursor protein; Glycine cleavage T-protein		307	3	4		M	p3LM(2); p2S(1)	13.2.5.2 amino acid metabolism.degradation.serine-glycine-cysteine group.glycine
	AT1G11870.1	1	Ser-tRNA synthetase - AtSRS (OVULE ABORTION 7) (dual targeted - cTP/mTP)		56	1	1	mitochondria; plastid stroma	M	p2S(1)	29.1.11 protein.aa activation.serine-tRNA ligase
	AT1G12230.1	7	transaldolase		587	10	15	plastid stroma	C	p2S(2); p1S(2); p3T(1); p3S(1); p2T(1)	7.2.2 OPP.non-reductive PP.transaldolase
	AT1G12250.1	5	thylakoid lumen pentapeptide repeat		2594	20	37	thylakoid-peripheral-lumenal-side	C	p2T(4); p3T(1)	26.54* misc. Pentapeptide repeat (PPR) unknown function
	AT1G12410.1	12	ClpR2		2808	35	60	plastid stroma; thylakoid-peripheral-stromal-side	C	p3S(5); p1S(4); p2S(2); p3LM(1)	29.5.5 protein.degradation.serine protease
	AT1G12520.1	6	Cu-metallo chaperone (AtCCS)		417	8	12	plastid stroma	_	p1S(4); p2S(1); p3S(1)	15.2 metal handling.binding, chelation and storage
	AT1G12800.1	7	S1 RNA-binding domain-containing protein		627	14	21	plastid stroma	C	p1S(3); p3S(2); p2S(1); p3LM(1)	27.3.23 RNA.regulation of transcription.HSF,Heat-shock transcription factor family
	AT1G12840.1	5	V-ATPase subunit C (VATC) (DET3)		643	5	7	vacuole	M	p3LM(2); p3T(1); p2S(1); p3S(1)	34.1 transport.p- and v-ATPases
	AT1G12900.1	46	glyceraldehyde-3-phosphate dehydrogenase A-2 (GAPA-2)		42561	343	140	plastid stroma	C	p1S(22); p2S(7); p3S(5); p3T(5); p3LM(4); p2T(3)	1.3.4 PS.calvin cyle.GAP
	AT1G13270.1	7	methionine aminopeptidase MAP1B		386	8	11	mitochondria; plastid	C	p3S(2); p3T(2); p2S(1); p1S(1); p3LM(1)	29.5.7 protein.degradation.metalloprotease
	AT1G13280.1	9	allene oxide cyclase family similar to ERD12		1757	23	32	plastid stroma	C	p3S(4); p1S(3); p2S(1); p3T(1)	17.7.1.4 hormone metabolism.jasmonate.synthesis-degradation.allene oxidase cyclase
	AT1G13440.1	8	glyceraldehyde-3-phosphate dehydrogenase C-2 (GAPC-2)		1761	29	9	not plastid	_	p1S(5); p2S(2); p3S(1)	4.9 glycolysis.glyceraldehyde 3-phosphate dehydrogenase
	AT1G13930.1	8	expressed protein - weak similarity to 60S ribosomal su		1283	10	17		_	p3S(4); p1S(3); p2S(1)	20.2.99 protein.synthesis.misc
	AT1G14030.1	1	Rubisco LS methyltransferase (LSMT)		47	1	1	plastid stroma	C	p2T(1)	1.3.13 PS.calvin cyle.rubisco interacting
	AT1G14150.1	3	PsbQ domain TAT lTP		484	10	15	thylakoid-peripheral-lumenal-side	C	p2T(2); p3T(1)	1.1.1.2 PS.lightreaction.photosystem II.PSII polypeptide subunits
	AT1G14345.1	3	expressed protein		323	6	8	thylakoid-integral	C	p2T(2); p3T(1)	35.2 not assigned.unknown
	AT1G14410.1	4	DNA-binding protein (pTAC1) Why1 - DNA binding/transcription factor -p24 like		439	6	9	plastid stroma	C	p1S(3); p2S(1)	27.3.67 RNA.regulation of transcription.putative transcription regulator
	AT1G14810.1	13	aspartate-semialdehyde dehydrogenase		1820	49	69	plastid stroma	C	p1S(10); p3S(1); p2S(1); p3LM(1)	13.1.3.6.1.2 amino acid metabolism.synthesis.aspartate family.misc.homoserine.aspartate semialdehyde dehydrogenase
	AT1G15060.1	2	expressed protein		91	2	2		C	p3S(1); p1S(1)	35.2 not assigned.unknown
	AT1G15140.1	10	oxidoreductase NAD-binding domain-containing protein		1495	33	55	plastid stroma	C	p1S(5); p3S(2); p2S(1); p3T(1); p3LM(1)	26.7 misc.oxidases - copper, flavone etc.
	AT1G15170.1	2	MATE efflux family protein		90	2	4		_	p2T(2)	34.99 transport.misc
	AT1G15390.1	8	peptide deformylase 1A (PDF1A)		538	9	12	mitochondria; plastid	C	p3S(3); p2S(2); p1S(2); p3LM(1)	29.4 protein.posttranslational modification; 26.1 misc.misc2
	AT1G15410.1	2	aspartate-glutamate racemase family		129	3	4		C	p1S(2)	13.1.2.3.31 amino acid metabolism.synthesis.glutamate family.arginine.aspartate racemase
	AT1G15500.1	1	AtNTT2 - adenine nucleotide translocase	4)	339	4	0	envelope	M	p3LM(1)	34.8 transport.metabolite transporters at the envelope membrane
	AT1G15690.1	1	inorganic pyrophosphatase		204	2	3		S	p3LM(1)	23.4.99 nucleotide metabolism.phosphotransfer and pyrophosphatases.misc
	AT1G15710.1	4	prephenate dehydrogenase family protein		462	5	9	plastid	C	p1S(3); p2S(1)	13.1.6.4.2 amino acid metabolism.synthesis.aromatic aa.tyrosine.prephenate dehydrogenase
	AT1G15820.1	33	LHCII-6 - CP24		10485	126	365	thylakoid-integral	M	p2T(12); p3T(6); p2S(5); p3S(5); p1S(3); p3LM(2)	1.1.1.1 PS.lightreaction.photosystem II.LHC-II
	AT1G15980.1	3	glycosyl transferase domain		297	12	18	plastid	C	p2T(2); p3T(1)	35.2 not assigned.unknown
	AT1G16080.1	13	expressed protein		2960	40	71	plastid stroma	C	p1S(5); p3S(2); p3T(2); p3LM(2); p2S(1); p2T(1)	35.2 not assigned.unknown
	AT1G16445.1	1	rRNA methylase (putative)		66	1	1		C	p3S(1)	27 RNA
	AT1G16720.1	10	HCF173 - involved in translation of the D1 protein		2006	35	59	plastid	C	p1S(3); p3S(2); p2S(2); p2T(2); p3LM(1)	29.2.99 protein.synthesis.misc
	AT1G16790.1	1	30S ribosomal protein S8?		102	1	2		_	p3LM(1)	29.2.1.1 protein.synthesis.chloroplast/mito.plastid
	AT1G16880.1	9	uridylyltransferase-related		3518	39	96	plastid stroma; thylakoid-inner-peripheral-stromal-side	C	p1S(4); p2S(2); p3S(1); p3T(1); p3LM(1)	3.8.3 minor CHO metabolism.galactose.galactose-1-phosphate uridyl transferases
	AT1G17050.1	10	geranyl diphosphate synthase - GPPS or AtSPS2		899	11	17	plastid stroma	C	p1S(4); p3S(3); p2S(2); p3LM(1)	16.1.1 secondary metabolism.isoprenoids.non-mevalonate pathway
	AT1G17160.1	2	pfkB type carbohydrate kinase protein		111	5	8		C	p1S(2)	3.5 minor CHO metabolism.others
	AT1G17220.1	19	translation initiation factor IF-2		4900	87	141	plastid stroma	C	p1S(9); p3S(3); p2T(3); p2S(2); p3T(1); p3LM(1)	29.2.3 protein.synthesis.initiation
	AT1G17650.1	7	6-phosphogluconate dehydrogenase NAD-binding domain		2922	32	54	plastid stroma	C	p1S(4); p3S(1); p2S(1); p3LM(1)	7.1.3 OPP.oxidative PP.6-phosphogluconate dehydrogenase
	AT1G17745.1	8	D-3-phosphoglycerate dehydrogenase (3-PGDH)		1697	25	30	plastid stroma	C	p1S(5); p3S(2); p3LM(1)	13.1.5.1.1 amino acid metabolism.synthesis.serine-glycine-cysteine group.serine.phosphoglycerate dehydrogenase
	AT1G18060.1	5	expressed protein (fibrillin?)		813	14	22	thylakoid	C	p2T(3); p2S(1); p3T(1)	35.2 not assigned.unknown
	AT1G18080.1	1	ATARCA (Homolog of the Tobacco ArcA); nucleotide binding WD-40		65	1	1		_	p3LM(1)	27.3.99 RNA.regulation of transcription.unclassified
	AT1G18170.1	3	Isomerases TAT lTP		773	10	14	thylakoid-peripheral-lumenal-side	C	p2T(2); p3T(1)	29.6 protein.folding
	AT1G18440.1	1	peptidyl-tRNA hydrolase family		97	1	1		C	p3S(1)	27 RNA
	AT1G18500.1	9	2-isopropylmalate synthase (IMS1)		1756	46	59	plastid stroma	C	p1S(6); p3S(2); p2S(1)	13.1.4.4.1 amino acid metabolism.synthesis.branched chain group.leucine specific.2-isopropylmalate synthase
	AT1G18640.1	7	3-phosphoserine phosphatase-1 (PSP-1)		788	15	19	plastid	C	p1S(4); p3S(2); p2S(1)	13.1.5.1.3 amino acid metabolism.synthesis.serine-glycine-cysteine group.serine.phosphoserine phosphatase
	AT1G19150.1	1	LHCI-1-2 - LHC-730		93	2	3	thylakoid-integral	C	p3T(1)	1.1.2.1 PS.lightreaction.photosystem I.LHC-I
	AT1G19570.1	8	dehydroascorbate reductase-1 (DHAR1) - monomeric-cytosol		1135	9	12	cytosol	_	p3S(4); p1S(3); p3LM(1)	21.2.1 redox.ascorbate and glutathione.ascorbate
	AT1G19690.1	2	catalytic/ coenzyme binding		159	2	3		C	p1S(2)	35.2 not assigned.unknown
	AT1G19720.1	1	pentatricopeptide repeat (PPR) protein		38	1	1		_	p1S(1)	26.54* misc. Pentapeptide repeat (PPR) unknown function
	AT1G19800.1	2	TDG1 - permease		198	2	3	envelope-inner-integral	_	p2T(2)	34.8 transport.metabolite transporters at the envelope membrane
	AT1G20020.1	18	FNR-2 (interaction with Cytf, maybe also AT5G66190)		7613	112	179	thylakoid-peripheral-stromal-side	C	p1S(8); p2T(4); p3S(2); p3T(2); p2S(1); p3LM(1)	1.1.7 PS.lightreaction.ferredoxin reductase
	AT1G20340.1	26	plastocyanin-1 (PC-1)		4008	27	66	thylakoid-peripheral-lumenal-side	C	p3S(8); p1S(8); p2T(5); p2S(2); p3T(2); p3LM(1)	1.1.5.1 PS.lightreaction.other electron carrier (ox/red).plastocyanin
	AT1G20620.1	16	catalase 3 (CAT3)		2103	49	72	not plastid	_	p1S(11); p3S(3); p3T(1); p3LM(1)	21.6 redox.dismutases and catalases
	AT1G20810.1	3	Isomerases - lumen		622	12	22	thylakoid-peripheral-lumenal-side	C	p2T(2); p3T(1)	29.6 protein.folding
	AT1G21060.1	1	unknown protein (Duf547)		44	1	1		C	p3S(1)	35.2 not assigned.unknown
	AT1G21065.1	1	expressed proteins		37	1	1		S	p2S(1)	35.2 not assigned.unknown
	AT1G21350.1	3	expressed protein		196	5	5	plastid	S	p2S(2); p1S(1)	35.2 not assigned.unknown
	AT1G21440.1	9	carboxyvinyl-carboxyphosphonate phosphorylmutase		2639	31	43	plastid stroma	C	p1S(5); p3S(1); p3T(1); p2S(1); p3LM(1)	35.2 not assigned.unknown
	AT1G21640.1	2	NADK2 - NADPH synthesis		345	4	6	plastid	C	p2S(1); p1S(1)	18.21* Co-factor and vitamine metabolism.NAD/NADP
	AT1G22630.1	1	unknown protein		75	1	2		S	p3LM(1)	35.2 not assigned.unknown
	AT1G22700.1	3	Pyg7 - TPR protein - PSI assembly (homologue YCF37 Synechocystis)		565	6	10	thylakoid-integral	C	p3T(2); p2T(1)	29.8 protein assembly and cofactor ligation
	AT1G22850.1	1	unknown protein (DedA domain)		99	1	1		C	p3T(1)	35.2 not assigned.unknown
	AT1G22940.1	3	TH1 (THIAMINE REQUIRING 1); phosphomethylpyrimidine kinase/ thiamin-phosphate diphosphorylase		175	3	3		M	p3S(2); p2S(1)	18.2.2 Co-factor and vitamine metabolism.thiamine.hydroxymethylpyrimidine kinase
	AT1G23180.1	6	armadillo/beta-catenin repeat family protein		1479	32	47	plastid	C	p1S(3); p2S(1); p3S(1); p3LM(1)	35.1.3 not assigned.no ontology.armadillo/beta-catenin repeat family protein
	AT1G23310.1	1	alanine 2-oxoglutarate amino transferase 1 (GGAT1)	5)	116	2	0	peroxisome	_	p1S(1)	1.2.3 PS.aminotransferases peroxisomal
	AT1G23740.1	17	oxidoreductase, zinc-binding dehydrogenase family		8118	98	190	plastid stroma	C	p1S(6); p2S(4); p3T(2); p3S(2); p2T(2); p3LM(1)	26.7 misc.oxidases - copper, flavone etc.
	AT1G24360.1	13	Plastidial Ketoacyl-ACP Reductase		2726	31	57	plastid stroma	C	p1S(6); p3S(2); p2S(2); p3LM(2); p3T(1)	11.1.4 lipid metabolism.FA synthesis and FA elongation.ACP oxoacyl reductase
	AT1G24807.1	1	anthranilate synthase beta subunit	6)	72	2	0		_	p3S(1)	13.1.6.5.1 amino acid metabolism.synthesis.aromatic aa.tryptophan.anthranilate synthase
	AT1G26090.1	1	Anion-transporting ATPase		79	1	1	plastoglobules	C	p2T(1)	34.18.1 transport.unspecified anions.arsenite-transporting ATPase
	AT1G26160.1	2	metal-dependent phosphohydrolase HD domain		138	2	3		C	p2S(1); p3LM(1)	35.1 not assigned.no ontology
	AT1G26220.1	3	GCN5-related N-acetyltransferase (GNAT)		158	4	7	plastid	C	p2S(1); p3T(1); p2T(1)	26.24 misc.GCN5-related N-acetyltransferase
	AT1G26230.1	3	Cpn60-beta-4		245	4	6	plastid	C	p1S(2); p2S(1)	29.6 protein.folding
	AT1G26680.1	2	transcriptional factor B3 family protein		81	2	2		C	p1S(2)	27.3.41 RNA.regulation of transcription.B3 transcription factor family
	AT1G27450.1	7	Adenine phosphoribosyltransferase-1 (APT1)		1167	17	30	cytosol	C	p1S(3); p3S(2); p2S(1); p3LM(1)	23.3.1.1 nucleotide metabolism.salvage.phosphoribosyltransferases.aprt
	AT1G28140.1	3	expressed protein		486	7	11	plastid	M	p2T(2); p3T(1)	9.7 mitochondrial electron transport / ATP synthesis.cytochrome c oxidase
	AT1G29040.1	1	unknown protein		55	1	1		C	p2S(1)	35.2 not assigned.unknown
	AT1G29195.1	1	expressed protein		39	1	1		S	p2T(1)	35.2 not assigned.unknown
	AT1G29395.1	1	COR414-TM1 (cold regulated 414 thylakoid membrane 1)		52	1	1		C	p3LM(1)	20.2.2 stress.abiotic.cold
	AT1G29700.1	6	similar to Zn-dependent hydrolases of the beta-lactamase fold		516	7	11	plastid	C	p1S(4); p2T(2)	35.2 not assigned.unknown
	AT1G29900.1	17	carbamoylphosphate synthetase		7199	153	246	plastid stroma	C	p1S(6); p2S(4); p3S(3); p2T(2); p3T(1); p3LM(1)	13.1.2.3.11 amino acid metabolism.synthesis.glutamate family.arginine.carbamoyl-phosphate synthase; 23.1.1.1 nucleotide metabolism.synthesis.pyrimidine.carbamoyl phosphate synthetase
	AT1G29910.1	32	LHCII-1.1 - 100% identical to lhcb-1.2,3-mature	7)	16351	139	0	thylakoid-integral	C	p3T(10); p2T(8); p3S(5); p1S(5); p2S(2); p3LM(2)	1.1.1.1 PS.lightreaction.photosystem II.LHC-II
	AT1G29930.1	34	LHCII-1.3 - 100% identical to lhcb-1.1,2 -mature		18915	150	68	thylakoid-integral	C	p3T(10); p2T(10); p3S(5); p1S(5); p2S(2); p3LM(2)	1.1.1.2 PS.lightreaction.photosystem II.PSII polypeptide subunits
	AT1G30120.1	2	Plastidial Pyruvate Dehydrogenase E1 -beta subunit	8)	179	4	0		C	p2S(1); p3LM(1)	11.1.31 lipid metabolism.FA synthesis and FA elongation.pyruvate DH
	AT1G30380.1	4	psaK - subunit X		425	5	12	thylakoid-integral	C	p2T(2); p3T(1); p2S(1)	1.1.2.2 PS.lightreaction.photosystem I.PSI polypeptide subunits
	AT1G31160.1	6	protein kinase C (inhibitor) (Zinc-binding protein)		440	7	8		C	p1S(4); p3S(1); p3LM(1)	29.4.2* protein.postranslational modification.kinase inhibitor
	AT1G31180.1	9	3-isopropylmalate dehydrogenase-3, chloroplast,		2965	47	35	plastid stroma	M	p1S(4); p2S(3); p3S(1); p2T(1)	13.1.4.4.3 amino acid metabolism.synthesis.branched chain group.leucine specific.3-isopropylmalate dehydrogenase
	AT1G31190.1	8	Inositol monophophatase-1		1008	24	43	plastid stroma	C	p1S(5); p3S(2); p2S(1)	3.4.5 minor CHO metabolism.myo-inositol.inositol phosphatase
	AT1G31220.1	1	phosphoribosylglycinamide formyltransferase		85	1	2		C	p1S(1)	23.1.2.3 nucleotide metabolism.synthesis.purine.GAR transformylase
	AT1G31230.1	14	aspartate kinase/homoserine dehydrogenase (ak-hsdh)		3327	43	49	plastid stroma	C	p1S(8); p3S(3); p2S(1); p2T(1); p3LM(1)	13.1.3.6.1.1 amino acid metabolism.synthesis.aspartate family.misc.homoserine.aspartate kinase
	AT1G31330.1	26	psaF- subunit III - LTP - hydrophobic		6725	74	250	thylakoid-integral	C	p2T(11); p1S(6); p3T(5); p2S(2); p3S(1); p3LM(1)	1.1.2.2 PS.lightreaction.photosystem I.PSI polypeptide subunits
	AT1G31800.1	4	cytochrome P450-type monooxygenase CYP97A3; beta hydroxylase		368	7	12	plastid	C	p1S(3); p3LM(1)	26.1 misc.cytochrome P450
	AT1G31860.1	10	histidine biosynthesis bifunctional protein (HISIE) or phosphoribosyl-ATP pyrophosphohydrolase		922	12	18		M	p1S(7); p2S(2); p3S(1)	13.1.7.2 amino acid metabolism.synthesis.histidine.phosphoribosyl-ATP diphosphatase
	AT1G32060.1	29	phosphoribulokinase-2 (PRK-2)		14930	222	490	plastid stroma	C	p3S(8); p1S(8); p2S(7); p2T(3); p3LM(2); p3T(1)	1.3.12 PS.calvin cyle.PRK
	AT1G32080.1	15	HP45 unknown function		3110	29	64	envelope-inner-integral	C	p2T(4); p3LM(4); p3S(3); p3T(3); p2S(1)	35.1 not assigned.no ontology
	AT1G32200.1	6	glycerol-3-phosphate acyltransferase (ATS1)		672	7	13	plastid stroma	C	p1S(5); p3S(1)	11.3.1 lipid metabolism.Phospholipid synthesis.1-acylglycerol-3-phosphate O-acyltransferase
	AT1G32220.1	9	flavin reductase-related (3Beta_HSD; Isoflavone_redu)		753	13	18	plastid stroma; plastoglobules	C	p3T(2); p3S(2); p2T(2); p1S(2); p3LM(1)	35.2 not assigned.unknown
	AT1G32440.1	1	pyruvate kinase (typically homotetramer)		37	1	1		C	p1S(1)	11.1.30 lipid metabolism.FA synthesis and FA elongation.pyruvate kinase
	AT1G32520.1	5	expressed protein		294	5	7		C	p1S(5)	35.2 not assigned.unknown
	AT1G32900.1	7	starch synthase, putative		3137	36	59	plastid stroma	C	p2T(4); p3T(1); p3S(1); p2S(1)	2.1.2.2 major CHO metabolism.synthesis.starch.starch synthase
	AT1G32990.1	21	50S ribosomal protein L11p		5551	94	151	plastid ribosome	C	p1S(6); p3S(5); p2T(4); p2S(2); p3T(2); p3LM(2)	29.2.1.1 protein.synthesis.chloroplast/mito.plastid
	AT1G33330.1	4	peptide chain release factor, putative, Peptidyl-tRNA hydrolase domain		208	4	4		M	p3S(2); p2S(1); p3LM(1)	29.2.5 protein.synthesis.release
	AT1G33810.1	3	expressed protein		508	5	8	thylakoid	_	p2T(2); p3LM(1)	35.2 not assigned.unknown
	AT1G34000.1	3	Ohp2		631	12	16	thylakoid-integral	C	p2T(2); p3T(1)	1.1.8* light stress chlorophyll binding
	AT1G34430.1	4	Plastidial Dihydrolipoamide Acetyltransferase, pyruvate DH complex		428	4	6	envelope-inner-peripheral-stromal-side	C	p2T(2); p3T(1); p3LM(1)	11.1.31 lipid metabolism.FA synthesis and FA elongation.pyruvate DH
	AT1G35340.1	2	ATP-dependent protease La (LON) domain-containing protein		109	2	3		C	p1S(2)	29.5 protein.degradation
	AT1G35420.1	3	dienelactone hydrolase family		154	4	4	plastid stroma	C	p1S(2); p2S(1)	35.2 not assigned.unknown
	AT1G35680.1	13	50S ribosomal protein L21		3701	58	103	plastid ribosome	C	p3S(4); p1S(3); p2S(2); p3LM(2); p3T(1); p2T(1)	29.2.1.1 protein.synthesis.chloroplast/mito.plastid
	AT1G35720.1	5	Annexin - AnnAt1		296	6	8	plastid	_	p1S(2); p3S(1); p2S(1); p3LM(1)	31.1 cell.organisation
	AT1G36390.1	2	GrpE-2		203	2	4	plastid stroma	C	p3S(1); p2S(1)	29.6 protein.folding
	AT1G42960.1	7	Hp17		1145	9	13	thylakoid	C	p2T(2); p3LM(2); p2S(1); p3S(1); p3T(1)	35.2 not assigned.unknown
	AT1G42970.1	67	glyceraldehyde-3-phosphate dehydrogenase B (GAPB)		39415	473	893	plastid stroma	C	p1S(26); p3S(13); p2S(12); p2T(8); p3LM(5); p3T(3)	1.3.4 PS.calvin cyle.GAP
	AT1G43560.1	8	thioredoxin y2 (Trx Y2)		491	14	21	plastid stroma	C	p1S(5); p2S(1); p3S(1); p3LM(1)	21.1 redox.thioredoxin
	AT1G44575.1	19	psbS (NPQ4 - null mutant)		10908	97	298	thylakoid-integral	C	p2T(6); p3S(4); p3T(4); p1S(3); p2S(1); p3LM(1)	1.1.1.2 PS.lightreaction.photosystem II.PSII polypeptide subunits
	AT1G44920.1	5	expressed protein		323	5	7		C	p2T(2); p2S(1); p3T(1); p3LM(1)	35.2 not assigned.unknown
	AT1G45230.1	5	defective chloroplasts and leaves protein-like (DCL-like)		379	5	9	plastid	C	p2S(2); p1S(2); p3S(1)	33.99 development.unspecified
	AT1G45474.1	3	LHCI-5 - new		763	10	18	thylakoid-integral	M	p2T(2); p3T(1)	1.1.2.1 PS.lightreaction.photosystem I.LHC-I
	AT1G48350.1	6	50S ribosomal protein L18p		500	8	13	plastid ribosome	C	p1S(3); p3S(1); p2S(1); p3LM(1)	29.2.1.1 protein.synthesis.chloroplast/mito.plastid
	AT1G48420.1	7	putative ACC deaminase (Pyridoxal-phosphate dependent enzyme domain)		1088	10	17	plastid	M	p2S(3); p3S(2); p1S(2)	17.5.1 hormone metabolism.ethylene.synthesis-degradation
	AT1G48470.1	2	GLN1;5 (GLUTAMINE SYNTHETASE 1;5); glutamate-ammonia ligase		104	2	4		_	p3S(2)	12.2.2 N-metabolism.ammonia metabolism.glutamine synthase
	AT1G48520.1	14	Glu-tRNA(Gln) amidotransferase subunit B (GATB or GLU-ADT subunit B)		1721	31	51	plastid stroma	M	p1S(6); p3S(2); p2S(2); p2T(2); p3LM(2)	19.1 tetrapyrrole synthesis.glu-tRNA synthetase
	AT1G48850.1	3	chorismate synthase		223	4	6	plastid	C	p2S(1); p3S(1); p1S(1)	13.1.6.1.7 amino acid metabolism.synthesis.aromatic aa.chorismate.chorismate synthase
	AT1G48860.1	1	3-phosphoshikimate 1-carboxyvinyltransferase, 5-enolpyruvylshikimate-3-phosphate / EPSP synthase		43	1	2		C	p1S(1)	13.1.6.1.6 amino acid metabolism.synthesis.aromatic aa.chorismate.5-enolpyruvylshikimate-3-phosphate synthase
	AT1G49630.1	4	AtPrep2 - metalloprotease (dual targeted)		1173	24	4	mitochondria; plastid stroma	C	p1S(4)	29.5.7 protein.degradation.metalloprotease
	AT1G49970.1	10	ClpR1		2182	30	50	plastid stroma; thylakoid-inner-peripheral-stromal-side	C	p1S(5); p3S(2); p3T(1); p2S(1); p3LM(1)	29.5.5 protein.degradation.serine protease
	AT1G50020.1	1	tubulin alpha-6 chain		246	2	4		C	p3T(1)	31.1 cell.organisation
	AT1G50170.1	6	sirohydrochlorin ferrochelase - SirB		406	6	9	plastid	C	p3S(2); p2S(2); p2T(1); p3LM(1)	19.32 tetrapyrrole synthesis.sirohydrochlorin ferrochelatase
	AT1G50250.1	7	FtsH1		8017	83	34	thylakoid-integral	C	p2T(5); p3T(2)	29.5.7 protein.degradation.metalloprotease
	AT1G50320.1	2	thioredoxin x (Trx X)		273	4	7	plastid stroma	C	p2S(1); p3LM(1)	21.1 redox.thioredoxin
	AT1G50450.1	2	saccharopine dehydrogenase family protein		139	3	3	plastid	M	p3T(1); p2T(1)	35.2 not assigned.unknown
	AT1G50900.1	1	Expressed protein - ankyrin domain		49	1	1		C	p2T(1)	35.2 not assigned.unknown
	AT1G51100.1	6	expressed protein		570	10	12	plastid stroma	C	p3S(4); p2S(2)	35.2 not assigned.unknown
	AT1G51110.1	3	fibrillin (FIB10)		709	10	13	thylakoid-peripheral-stromal-side	C	p2T(2); p3T(1)	26.31* misc. fibrillins
	AT1G52220.1	2	expressed protein		306	2	3	thylakoid	C	p3T(1); p2T(1)	35.2 not assigned.unknown
	AT1G52230.1	3	psaH-2 - subunit VI		1499	9	7	thylakoid-integral	C	p3S(1); p3T(1); p2T(1)	1.1.2.2 PS.lightreaction.photosystem I.PSI polypeptide subunits
	AT1G52400.1	1	6-phospho-beta-galactosidase (BG1)		109	1	3		S	p3LM(1)	26.3 misc.gluco-, galacto- and mannosidases
	AT1G52510.1	19	hydrolase, alpha/beta fold family		5543	74	121	plastid stroma	C	p1S(8); p2S(3); p2T(3); p3T(2); p3S(2); p3LM(1)	35.2 not assigned.unknown
	AT1G52670.1	4	Biotin carboxyl carrier protein of acetyl-CoA carboxylase (BCCP)		371	4	6	plastid	C	p1S(2); p2S(1); p3S(1)	35.1 not assigned.no ontology
	AT1G53120.1	3	RNA-binding S4 domain-containing protein		238	3	5	plastid	M	p3S(2); p1S(1)	35.1.14 not assigned.no ontology.S RNA-binding domain-containing protein
	AT1G53240.1	6	malate dehydrogenase [NAD], mitochondrial		1473	19	8	mitochondria	M	p1S(2); p3T(1); p2S(1); p3S(1); p3LM(1)	8.1.9 TCA / org. transformation.TCA.malate DH
	AT1G53280.1	6	DJ-1/PfpI family		693	13	19	plastid	C	p1S(4); p2S(1); p3S(1)	35.1 not assigned.no ontology
	AT1G53520.1	13	chalcone-flavanone isomerase-related		2916	46	74	plastid	C	p3S(5); p1S(5); p2S(2); p3LM(1)	16.8.2 secondary metabolism.flavonoids.chalcones
	AT1G53670.1	1	methione sulfoxide reductase type B - 1 (MSRB1)		74	2	3	plastid stroma	C	p2S(1)	29.11* protein.methione sulfoxide reductases
	AT1G54350.1	3	ABC transporter family protein		685	11	15	plastid	C	p2T(2); p3T(1)	34.16 transport.ABC transporters and multidrug resistance systems
	AT1G54500.1	4	rubredoxin (RubA)		1658	13	26	thylakoid-integral	C	p3T(2); p2T(2)	29.8 protein assembly and cofactor ligation
	AT1G54520.1	3	expressed protein (DUF1517 - InterPro:IPR010903)		251	3	4		C	p3T(2); p3S(1)	35.2 not assigned.unknown
	AT1G54570.1	3	Diacyl glycerol transferase (DAGAT)		643	5	9	plastoglobules	C	p2T(2); p3T(1)	11.1 lipid metabolism.glycolipid synthesis
	AT1G54580.1	3	acyl carrier protein, chloroplast		198	3	6	plastid	C	p1S(3)	11.1.12 lipid metabolism.FA synthesis and FA elongation.ACP protein
	AT1G54630.1	9	acyl carrier protein 3, chloroplast (ACP-3)		606	9	14	plastid	C	p1S(5); p3S(3); p3T(1)	11.1.12 lipid metabolism.FA synthesis and FA elongation.ACP protein
	AT1G54780.1	15	thylakoid lumen 18.3 kDa		3814	56	101	thylakoid-peripheral-lumenal-side	C	p3S(4); p2T(4); p3T(3); p1S(3); p2S(1)	35.2 not assigned.unknown
	AT1G55480.1	6	expressed protein		1563	18	31	thylakoid-peripheral-stromal-side	C	p2T(2); p3T(1); p2S(1); p3S(1); p3LM(1)	35.2 not assigned.unknown
	AT1G55490.1	27	Cpn60-beta-2		20814	241	123	plastid stroma	C	p1S(14); p2S(4); p3S(4); p2T(2); p3LM(2); p3T(1)	29.6 protein.folding
	AT1G55670.1	12	psaG - subunit V- stromal side		841	16	53	thylakoid-integral	C	p1S(4); p3T(2); p2S(2); p2T(2); p3S(1); p3LM(1)	1.1.2.2 PS.lightreaction.photosystem I.PSI polypeptide subunits
	AT1G56050.1	4	GTP-binding protein; DUF933		343	5	5	plastid stroma	C	p1S(2); p3S(1); p3LM(1)	30.5 signalling.G-proteins
	AT1G56070.1	8	elongation factor 2, EF-2		1243	10	20	not plastid	_	p3S(4); p3LM(2); p3T(1); p1S(1)	29.2.4 protein.synthesis.elongation
	AT1G56190.1	38	phosphoglycerate kinase-1 (PGK-2)		22408	295	149	plastid stroma	C	p1S(15); p3S(9); p2S(7); p3LM(3); p3T(2); p2T(2)	1.3.3 PS.calvin cyle.phosphoglycerate kinase; 4.1 glycolysis.phosphoglycerate kinase
	AT1G56500.1	8	haloacid dehalogenase-like hydrolase-1		2877	56	85	plastid stroma	C	p2T(4); p2S(2); p3T(1); p3S(1)	3.2 minor CHO metabolism.trehalose
	AT1G57770.1	6	amine oxidase family, contains similarity to carotenoid isomerase (Lycopersicon esculentum) GI:19550437, phytoene dehydrogenase (PDH1)		1269	28	37	plastid	C	p1S(3); p3S(1); p2S(1); p3LM(1)	16.1.4 secondary metabolism.isoprenoids.carotenoids
	AT1G58080.1	3	ATP phosphoribosyl transferase		265	3	3		C	p2S(1); p3S(1); p1S(1)	13.1.7.1 amino acid metabolism.synthesis.histidine.ATP phosphoribosyl transferase
	AT1G58280.1	1	phosphoglycerate/bisphosphoglycerate mutase (PGM-i)		38	1	1		_	p1S(1)	4.11 glycolysis.phosphoglycerate mutase
	AT1G59840.1	1	unknown protein		134	1	2		M	p3T(1)	35.2 not assigned.unknown
	AT1G59870.1	1	ABC transporter family		51	1	1		C	p3LM(1)	34.16 transport.ABC transporters and multidrug resistance systems
	AT1G59990.1	1	DEAD/DEAH box helicase		54	1	1		C	p1S(1)	27.5* RNA. DEAD/DEAH BOX helicase
	AT1G60950.1	1	Fd2-leaf		76	1	2	plastid stroma; thylakoid-peripheral-stromal-side	C	p1S(1)	1.1.5.2 PS.lightreaction.other electron carrier (ox/red).ferredoxin
	AT1G61520.1	21	LHCI-3 - LHCI-680A CAB4		11358	99	262	thylakoid-integral	C	p2T(8); p3S(5); p3T(3); p2S(2); p1S(2); p3LM(1)	1.1.2.1 PS.lightreaction.photosystem I.LHC-I
	AT1G62180.1	1	5'-adenylylsulfate reductase-2 (APR2)		121	1	2		C	p3S(1)	14.2 S-assimilation.APR
	AT1G62640.1	7	3-oxoacyl-(acyl-carrier-protein) synthase III / 3-ketoacyl-acyl carrier protein synthase III (KAS III)		686	14	21	plastid stroma	C	p1S(5); p2S(2)	11.1.3 lipid metabolism.FA synthesis and FA elongation.ketoacyl ACP synthase
	AT1G62750.1	29	elongation factor Tu-G (EF-G) (sco1)		14185	219	395	plastid stroma	C	p1S(11); p3S(7); p2S(6); p2T(2); p3LM(2); p3T(1)	29.2.4 protein.synthesis.elongation
	AT1G62780.1	14	expressed protein (NIPSNAP domain)		2835	36	64	plastid stroma	C	p3S(5); p1S(5); p2S(3); p3LM(1)	35.2 not assigned.unknown
	AT1G63610.1	7	expressed protein		404	10	12		C	p1S(5); p2S(1); p3S(1)	35.2 not assigned.unknown
	AT1G63770.1	13	glycyl aminopeptidase (M1) (model .2 is better than model .1)		1197	18	30	plastid stroma	C	p3S(7); p2S(2); p2T(2); p1S(1); p3LM(1)	29.5 protein.degradation
	AT1G63940.1	15	monodehydroascorbate reductase (MDHAR)		3574	45	74	mitochondria; plastid stroma	C	p1S(6); p3S(4); p2T(2); p2S(1); p3T(1); p3LM(1)	21.2.1 redox.ascorbate and glutathione.ascorbate
	AT1G63970.1	11	2C-methyl-D-erythritol 2,4-cyclodiphosphate synthase (ispF);		931	16	24	plastid stroma	C	p3S(4); p2S(2); p2T(2); p3T(1); p1S(1); p3LM(1)	16.1.1.5 secondary metabolism.isoprenoids.non-mevalonate pathway.MCS
	AT1G64190.1	3	6-phosphogluconate dehydrogenase-1		433	7	4	plastid	S	p2S(1); p3S(1); p1S(1)	7.1.3 OPP.oxidative PP.6-phosphogluconate dehydrogenase
	AT1G64510.1	6	30S ribosomal protein S6 (changed at1g64500)		505	8	11	plastid ribosome	C	p3S(2); p2S(1); p2T(1); p1S(1); p3LM(1)	29.2.1.1 protein.synthesis.chloroplast/mito.plastid
	AT1G64770.1	3	expressed protein		329	6	9	plastid	C	p2T(2); p3T(1)	35.2 not assigned.unknown
	AT1G65230.1	1	unknown protein		124	2	4		C	p3T(1)	35.2 not assigned.unknown
	AT1G65260.1	11	Vipp1 - mutant HCF155 - PspA like		3406	49	76	envelope; plastid stroma; thylakoid-peripheral-stromal-side	C	p1S(5); p2T(2); p3T(1); p2S(1); p3S(1); p3LM(1)	29.3.3 protein.targeting.chloroplast
	AT1G65410.1	2	ATNAP11 - non-intrinsic ABC protein 11		304	3	4		C	p3T(1); p3LM(1)	34.16 transport.ABC transporters and multidrug resistance systems
	AT1G65980.1	3	peroxiredoxin IIB (PrxII B)		160	3	4		_	p2S(1); p3S(1); p1S(1)	21.5 redox.periredoxins
	AT1G66430.1	11	pfkB family carbohydrate kinase		2046	38	61	plastid stroma	C	p1S(6); p3S(2); p2S(2); p3LM(1)	2.2.1.1 major CHO metabolism.degradation.sucrose.fructokinase
	AT1G66670.1	9	ClpP3		1372	21	36	plastid stroma; thylakoid-peripheral-stromal-side	C	p1S(5); p3S(2); p2S(1); p3LM(1)	29.5.5 protein.degradation.serine protease
	AT1G66970.1	1	glycerophosphoryl diester phosphodiesterase family protein, contains Pfam PF03009 : Glycerophosphoryl diester phosphodiesterase family		100	1	2		S	p3LM(1)	11.9.3.3 lipid metabolism.lipid degradation.lysophospholipases.glycerophosphodiester phosphodiesterase
	AT1G67090.1	63	Rubisco small subunit-4 (RBCS-4)		39506	313	461	plastid stroma	C	p2T(16); p1S(16); p3S(13); p2S(9); p3LM(5); p3T(4)	1.3.2 PS.calvin cyle.rubisco small subunit
	AT1G67280.1	14	glyoxalase I -1, putative (lactoylglutathione lyase)		3610	60	105	plastid stroma; thylakoid-peripheral-stromal-side	C	p1S(5); p3T(2); p2S(2); p3S(2); p2T(2); p3LM(1)	13.2.3.2 amino acid metabolism.degradation.aspartate family.threonine; 24.2 Biodegradation of Xenobiotics.lactoylglutathione lyase
	AT1G67700.1	12	auxin-regulated protein		3423	38	65	plastid	M	p3S(4); p2T(4); p3T(2); p2S(1); p3LM(1)	29.5 protein.degradation
	AT1G68010.1	4	glycerate dehydrogenase / NADH-dependent hydroxypyruvate reductase (HPR)		311	7	10	peroxisome	_	p3LM(2); p2S(1); p3S(1)	1.2.6 PS.photorespiration.hydroxypyruvate reductase; 13.2.5 amino acid metabolism.degradation.serine-glycine-cysteine group
	AT1G68590.1	2	PSRP-3A associates with 30S		261	6	7	plastid stroma	C	p3S(2)	29.2.1.99 protein.synthesis.chloroplast/mito.unknown
	AT1G68680.1	1	unknown protein		91	1	2		C	p3LM(1)	35.2 not assigned.unknown
	AT1G68830.1	5	Stt7-At1 kinase state transition thylakoid		634	11	17	thylakoid-integral	C	p2T(3); p3T(2)	1.1.30 PS.lightreaction.state transition
	AT1G69740.1	22	porphobilinogen synthase-1 (delta-aminolevulinic acid dehydratase-1) (ALAD-1)		2701	38	58	plastid stroma	C	p1S(9); p2S(6); p3S(3); p2T(2); p3T(1); p3LM(1)	19.4 tetrapyrrole synthesis.ALA dehydratase
	AT1G69830.1	21	alpha-amylase - AtAMY3		3835	80	134	plastid stroma	C	p1S(11); p2S(3); p3S(2); p2T(2); p3LM(2); p3T(1)	2.2.2.1 major CHO metabolism.degradation.starch.starch cleavage
	AT1G70070.1	7	DEAD/DEAH box helicase		2250	53	78	plastid	C	p1S(3); p3S(1); p2S(1); p2T(1); p3LM(1)	27.5* RNA. DEAD/DEAH BOX helicase
	AT1G70570.1	3	anthranilate phosphoribosyltransferase, putative		304	15	18		C	p1S(3)	13.1.6.5.2 amino acid metabolism.synthesis.aromatic aa.tryptophan.anthranilate phosphoribosyltransferase
	AT1G70610.1	1	ABC protein - transmembrane		127	2	3		C	p3LM(1)	34.16 transport.ABC transporters and multidrug resistance systems
	AT1G70710.1	1	CEL1 (cellulase 1); hydrolyzing O-glycosyl compounds		45	1	1		S	p3T(1)	10.6.1 cell wall.degradation.cellulases and beta -1,4-glucanases
	AT1G70820.1	10	phosphoglucomutase-2 (PGM-2)		2043	30	51	plastid stroma	C	p3S(5); p1S(3); p2S(1); p3LM(1)	4.2 glycolysis.PGM
	AT1G70890.1	1	major latex protein (MLP) related); Pathogenesis-related protein Bet v I family		39	1	1		_	p1S(1)	20.2.99 stress.abiotic.unspecified
	AT1G71440.1	1	PFI (PFIFFERLING); protein binding		38	1	1		_	p1S(1)	31.1 cell.organisation
	AT1G71480.1	2	nuclear transport factor 2 (NTF2) family protein		97	3	4	plastid	C	p3T(1); p2T(1)	29.3.1 protein.targeting.nucleus
	AT1G71500.1	13	Rieske [2Fe-2S] domain		3945	39	63	thylakoid	C	p2T(5); p3T(4); p3S(2); p1S(1); p3LM(1)	26.3 misc. other Ferredoxins and Rieske domain
	AT1G71810.1	2	ABC1 kinase - ABC1K1		390	12	18	plastoglobules	C	p3T(1); p2T(1)	26.56* misc.ABC1k family
	AT1G72370.1	1	40S ribosomal protein SA (RPSaA)		91	2	3	cytosol	_	p3LM(1)	29.2.2 protein.synthesis.misc ribososomal protein
	AT1G72640.1	5	expressed protein		634	6	9	plastid	C	p2T(2); p2S(1); p3S(1); p3T(1)	35.2 not assigned.unknown
	AT1G73060.1	17	expressed protein		3969	50	80	plastid	C	p1S(7); p3S(3); p2T(3); p2S(2); p3T(1); p3LM(1)	35.2 not assigned.unknown
	AT1G73110.1	12	activase -related		1335	15	26	plastid	C	p1S(5); p3S(3); p2S(2); p3T(1); p3LM(1)	1.3.13 PS.calvin cyle.rubisco interacting
	AT1G73170.1	4	ATP-dependent peptidase / serine-type endopeptidase		209	5	5		C	p1S(3); p3S(1)	29.5 protein.degradation
	AT1G73530.1	1	RNA recognition motif (RRM)-containing protein		49	1	2		C	p3S(1)	35.1 not assigned.no ontology
	AT1G73820.1	3	Ssu72-like family protein		122	3	3		M	p1S(2); p2S(1)	35.1 not assigned.no ontology
	AT1G73885.1	3	expressed protein		162	3	5	thylakoid	C	p2T(2); p3T(1)	35.2 not assigned.unknown
	AT1G73990.1	4	SppA		714	7	11	thylakoid-integral	C	p2T(2); p3T(1); p3LM(1)	29.5 protein.degradation
	AT1G74070.1	2	Isomerases TAT lTP		440	5	9		C	p3T(2)	29.6 protein.folding
	AT1G74260.1	14	AIR synthase related protein		4255	80	124	plastid stroma	M	p1S(6); p3S(3); p2S(2); p2T(2); p3LM(1)	23.1.2.4 nucleotide metabolism.synthesis.purine.FGAR amidotransferase
	AT1G74470.1	14	geranylgeranyl reductase (GGDR)		2608	39	59	thylakoid	C	p2T(7); p3T(3); p1S(3); p3LM(1)	16.1.1 secondary metabolism.isoprenoids.non-mevalonate pathway
	AT1G74640.1	1	expressed protein contains Pfam profile: PF00561 alpha/beta hydrolase fold		150	1	2		C	p2T(1)	35.2 not assigned.unknown
	AT1G74730.1	3	expressed protein		430	3	7	thylakoid	C	p2T(2); p3T(1)	35.2 not assigned.unknown
	AT1G74850.1	7	pentatricopeptide (PPR) repeat (pTAC2)		639	7	13	plastid nucleoid	C	p1S(3); p2T(2); p3T(1); p3LM(1)	28.3* DNA.plastid nucleoid interacting
	AT1G74880.1	1	NDH O		40	1	1	thylakoid	C	p3S(1)	1.1.6 PS.lightreaction.NADH DH
	AT1G74960.1	7	FAB1 (FATTY ACID BIOSYNTHESIS 1);beta-ketoacyl-ACP synthetase 2		421	10	15	plastid	C	p1S(4); p2S(2); p3S(1)	11.1.3 lipid metabolism.FA synthesis and FA elongation.ketoacyl ACP synthase
	AT1G74970.1	17	30S ribosomal protein S9		2771	38	70	plastid ribosome	C	p1S(6); p3S(5); p2S(2); p3T(2); p2T(1); p3LM(1)	29.2.1.1 protein.synthesis.chloroplast/mito.plastid
	AT1G75330.1	5	ornithine carbamoyltransferase		829	15	22	plastid stroma	C	p1S(3); p3S(1); p2S(1)	13.1.2.3.21 amino acid metabolism.synthesis.glutamate family.arginine.ornithine carbamoyltransferase
	AT1G75350.1	6	50S ribosomal protein L31 chloroplast		923	15	25	plastid ribosome	C	p1S(4); p3S(1); p3LM(1)	29.2.1.1 protein.synthesis.chloroplast/mito.plastid
	AT1G75460.1	1	ATP-dependent protease La (LON)		213	2	3	plastid	C	p2S(1)	29.5 protein.degradation
	AT1G75690.1	6	DnaJ domain family		808	6	11	plastid	C	p1S(3); p2T(2); p3T(1)	26.29* misc. DnaJ domain with unknown function
	AT1G76080.1	14	thioredoxin (CDSP32)		1670	44	65	plastid stroma	C	p1S(8); p2S(3); p3S(2); p3LM(1)	21.1 redox.thioredoxin
	AT1G76100.1	6	PC-2		403	6	8	thylakoid-peripheral-lumenal-side	C	p1S(3); p3T(1); p3S(1); p3LM(1)	1.1.5.1 PS.lightreaction.other electron carrier (ox/red).plastocyanin
	AT1G76140.1	1	prolyl oligopeptidase		42	1	1		C	p1S(1)	29.5 protein.degradation
	AT1G76180.1	1	dehydrin -ERD14		56	1	1		_	p3S(1)	20.2.99 stress.abiotic.unspecified
	AT1G76450.1	14	OEC23-like-2 Tat lTP		2382	23	40	thylakoid-peripheral-lumenal-side	C	p1S(5); p2T(4); p3S(2); p3T(2); p2S(1)	1.1.1.2 PS.lightreaction.photosystem II.PSII polypeptide subunits
	AT1G76730.1	2	5-formyltetrahydrofolate cyclo-ligase family protein		111	2	3		C	p1S(2)	25.4 C1-metabolism.5-formyltetrahydrofolate cyclo-ligase
	AT1G77060.1	5	isocitrate lyase (strange in the plastid) similar to carboxyphosphonoenolpyruvate mutase		738	9	7	plastid stroma	C	p3S(2); p1S(2); p2S(1)	6.9 gluconeogenese/ glyoxylate cycle.isocitrate lyase
	AT1G77090.1	11	OEC23-like-5 Tat lTP TL29.8		2489	34	57	thylakoid-peripheral-lumenal-side	C	p3S(4); p1S(3); p2T(2); p3T(1); p2S(1)	1.1.1.2 PS.lightreaction.photosystem II.PSII polypeptide subunits
	AT1G77490.1	10	thylakoid bound APX		1484	25	36	thylakoid-integral	C	p2T(5); p3T(3); p1S(2)	21.2.1 redox.ascorbate and glutathione.ascorbate
	AT1G77510.1	1	thioredoxin		41	1	1		S	p3LM(1)	21.1 redox.thioredoxin
	AT1G77590.1	5	LACS9 - acyl-CoA synthetase -plastid		1181	18	26	envelope-outer	C	p2T(2); p3T(1); p2S(1); p3LM(1)	11.1.9 lipid metabolism.FA synthesis and FA elongation.long chain fatty acid CoA ligase
	AT1G78060.1	3	glycosyl hydrolase family 3 protein		115	3	3		S	p1S(3)	10.6.2 cell wall.degradation.mannan-xylose-arabinose-fucose
	AT1G78140.1	3	Ubie_methyltransferase-related similar to delta(24)-sterol C-methyltransferase		165	3	4	plastoglobules	M	p2T(2); p3T(1)	35.1 not assigned.no ontology
	AT1G78370.1	11	glutathione transferase (Tau class) - ATGSTU20		795	14	21	not plastid	M	p3S(5); p1S(4); p2S(1); p3LM(1)	26.9 misc.glutathione S transferases
	AT1G78380.1	10	putative glutathione transferase		883	22	35	not plastid	_	p3S(5); p2S(2); p1S(2); p3LM(1)	26.9 misc.glutathione S transferases
	AT1G78560.1	1	bile acid:sodium symporter family		67	2	3		C	p3LM(1)	34.14 transport.unspecified cations
	AT1G78620.1	2	integral membrane family protein		103	2	3		C	p2S(1); p3LM(1)	35.1 not assigned.no ontology
	AT1G78630.1	13	30S ribosomal protein S5		4141	40	96	plastid ribosome	C	p3S(4); p2S(2); p2T(2); p1S(2); p3LM(2); p3T(1)	29.2.1.1 protein.synthesis.chloroplast/mito.plastid
	AT1G78900.1	1	ATPase 70 kDa		664	15	22	vacuole	_	p3LM(1)	34.1 transport.p- and v-ATPases
	AT1G78915.1	1	expressed protein		40	1	1	thylakoid	C	p3T(1)	35.2 not assigned.unknown
	AT1G79040.1	2	psbR		411	5	7	thylakoid-integral	C	p3T(1); p3LM(1)	1.1.1.2 PS.lightreaction.photosystem II.PSII polypeptide subunits
	AT1G79230.1	7	mercaptopyruvate/thiosulfate sulfurtransferase (Mst1/Rdh1) or AtStr1		542	9	11	mitochondria	C	p1S(6); p2S(1)	13.2.5.3 amino acid metabolism.degradation.serine-glycine-cysteine group.cysteine
	AT1G79440.1	1	succinate-semialdehyde dehydrogenase, putative (SSDH)		53	1	1		M	p3LM(1)	13.1.1.1.3 amino acid metabolism.synthesis.central amino acid metabolism.GABA.SSADH; 8.2.99 TCA / org. transformation.other organic acid transformaitons.misc
	AT1G79460.1	1	GA2 (GA REQUIRING 2); ent-kaurene synthase		43	1	1		C	p1S(1)	17.6.1.2 hormone metabolism.gibberelin.synthesis-degradation.ent-kaurene synthase
	AT1G79560.1	2	FtsH12		307	8	11		C	p3T(1); p3LM(1)	29.5.7 protein.degradation.metalloprotease
	AT1G79600.1	3	ABC1 kinase - ABC1K2		2100	32	55	plastoglobules	C	p2T(2); p3T(1)	26.56* misc.ABC1k family
	AT1G79790.1	8	haloacid dehalogenase-like hydrolase family protein		843	14	18	plastid stroma	C	p3S(4); p2S(2); p1S(2)	35.1 not assigned.no ontology
	AT1G79850.1	6	30S ribosomal protein S17 chloroplast		539	10	15	plastid ribosome	C	p1S(2); p3T(1); p3S(1); p2S(1); p3LM(1)	29.2.1.1 protein.synthesis.chloroplast/mito.plastid
	AT1G80030.1	2	DnaJ domain family		117	2	4	thylakoid	C	p3T(1); p2T(1)	26.29* misc. DnaJ domain with unknown function
	AT1G80380.2	19	phosphoribulokinase-1 (PRK-1) - Model .2 is better than model .2		5299	100	167	plastid stroma	C	p1S(9); p2S(3); p3S(2); p2T(2); p3LM(2); p3T(1)	1.3.12 PS.calvin cyle.PRK
	AT1G80480.1	3	similar to PRLI-interacting factor L (pTAC17)		288	6	3	plastid stroma	C	p1S(2); p2S(1)	28.3* DNA.plastid nucleoid interacting
	AT1G80560.1	5	3-isopropylmalate dehydrogenase-1		1901	23	10	plastid stroma	C	p2S(2); p1S(2); p3S(1)	13.1.4.4.3 amino acid metabolism.synthesis.branched chain group.leucine specific.3-isopropylmalate dehydrogenase
	AT1G80600.1	12	acetylornithine transaminase/AOTA/ACOAT)		2747	46	71	plastid stroma	C	p1S(6); p3S(3); p2S(3)	13.1.2.3.4 amino acid metabolism.synthesis.glutamate family.arginine.acetylornithine aminotransferase
	AT2G01110.1	1	TATC-like		64	1	2	thylakoid-integral	C	p3T(1)	29.3.3 protein.targeting.chloroplast
	AT2G01140.1	9	fructose-bisphosphate aldolase-3 (SFBA-3)		1251	28	30	plastoglobules	C	p1S(5); p2S(2); p3S(1); p3LM(1)	1.3.6 PS.calvin cyle.aldolase
	AT2G01210.1	25	leucine-rich repeat transmembrane protein kinase, putative		1025	25	37	plasma membrane	S	p2T(11); p2S(5); p3S(5); p3T(4)	30.2.3 signalling.receptor kinases.leucine rich repeat III
	AT2G01250.1	1	60S ribosomal protein L7 (RPL7B)		187	3	1	cytosol	_	p3LM(1)	29.2.2 protein.synthesis.misc ribososomal protein
	AT2G01320.1	1	ABC transporter family		100	2	3		_	p3LM(1)	34.16 transport.ABC transporters and multidrug resistance systems
	AT2G01350.1	2	quinolinate phosphoribosyl transferase family protein		147	3	4		M	p3S(1); p1S(1)	35.1 not assigned.no ontology
	AT2G01755.1	4	expressed protein		285	4	6		_	p1S(3); p3S(1)	35.2 not assigned.unknown
	AT2G01870.1	1	expressed protein		65	1	1		M	p2T(1)	35.2 not assigned.unknown
	AT2G02500.1	5	4-Diphosphocytidyl-2C-methyl-D-erythritol synthase (ISPD) - mevalonate-independent		332	7	11	plastid stroma	M	p1S(2); p3S(1); p2S(1); p3LM(1)	16.1.1.3 secondary metabolism.isoprenoids.non-mevalonate pathway.CMS
	AT2G02590.1	1	Putative small multi-drug export		48	1	1		C	p3LM(1)	34 transport
	AT2G02740.1	7	Why3 - DNA binding/transcription factor (p24 or Pbf-2) (pTAC11)		601	11	16	plastid nucleoid	C	p1S(3); p3T(1); p2S(1); p3S(1); p3LM(1)	27.3.82 RNA.regulation of transcription.plant TF (pbf2)
	AT2G03280.1	1	expressed protein		36	1	1		_	p3S(1)	35.1 not assigned.no ontology
	AT2G03390.1	3	uvrB/uvrC motif-containing protein		426	5	8	plastid stroma	C	p1S(2); p3S(1)	28.2 DNA.repair
	AT2G04030.1	23	cpHSP90		9618	144	264	plastid stroma	C	p1S(11); p3S(6); p2S(2); p2T(2); p3T(1); p3LM(1)	29.6 protein.folding
	AT2G04039.1	3	expressed protein		405	6	10	plastid	C	p2T(2); p3T(1)	35.2 not assigned.unknown
	AT2G04270.1	4	glycoside hydrolase starch-binding domain-containing protein		228	4	6		C	p1S(3); p2S(1)	2.2.2.4 major CHO metabolism.degradation.starch.D enzyme
	AT2G04400.1	5	indole-3-glycerol phosphate synthase (IGPS)		1220	25	39	plastid stroma	C	p2S(2); p1S(2); p3S(1)	13.1.6.5.4 amino acid metabolism.synthesis.aromatic aa.tryptophan.indole-3-glycerol phosphate synthase
	AT2G04842.1	12	Thr-tRNA synthetase (ThrRS-2) (dual targeted - cTP/mTP)		1140	24	35	mitochondria; plastid stroma	C	p1S(4); p2S(2); p3S(2); p2T(2); p3T(1); p3LM(1)	29.1.3 protein.aa activation.threonine-tRNA ligase
	AT2G05070.1	25	LHCII-2.2		11363	103	47	thylakoid-integral	C	p3T(7); p2T(7); p3S(6); p1S(4); p3LM(1)	1.1.1.1 PS.lightreaction.photosystem II.LHC-II
	AT2G05100.1	20	LHCII-2.1		8317	78	7	thylakoid-integral	C	p2T(7); p3T(4); p1S(4); p3S(3); p3LM(2)	1.1.1.1 PS.lightreaction.photosystem II.LHC-II
	AT2G05620.1	4	PGR5		392	4	9	thylakoid-peripheral-stromal-side	_	p2T(2); p3T(1); p1S(1)	1.1.40 PS.lightreaction.cyclic electron flow-chlororespiration
	AT2G05710.1	7	aconitate hydratase (citrate hydro-lyase/aconitase)		1833	39	63	plastid stroma	C	p1S(4); p3S(1); p2S(1); p3LM(1)	8.2.3 TCA / org. transformation.other organic acid transformaitons.aconitase
	AT2G05990.1	18	Enoyl-ACP reductase (MOD1 - (MOSAIC DEATH 1);		5243	71	119	plastid stroma	C	p1S(8); p3S(5); p2S(2); p3T(1); p2T(1); p3LM(1)	11.1.6 lipid metabolism.FA synthesis and FA elongation.enoyl ACP reductase
	AT2G07698.1	1	ATP synthase alpha chain, mitochondrial		62	2	1		S	p3T(1)	9.9 mitochondrial electron transport / ATP synthesis.F1-ATPase
	AT2G09990.1	1	40S ribosomal protein S16 (RPS16A), Same as GB:Q42340		55	1	2	cytosol	_	p3LM(1)	29.2.2 protein.synthesis.misc ribososomal protein
	AT2G10940.1	3	protease inhibitor/seed storage/lipid transfer protein (LTP) family		294	4	6		S	p3T(1); p2T(1); p3LM(1)	26.21 misc.protease inhibitor/seed storage/lipid transfer protein (LTP) family protein
	AT2G13360.1	12	alanine-glyoxylate aminotransferase (AGT1)		2135	29	56	peroxisome	_	p2S(4); p3S(3); p1S(3); p3LM(2)	1.2.3 PS.aminotransferases peroxisomal
	AT2G14260.1	5	PIP (proline iminopeptidase); prolyl aminopeptidase (PAP1)		374	7	9		S	p1S(4); p2S(1)	29.5 protein.degradation
	AT2G15290.1	5	Tic21 (cia5) also named PIC1 - Fe transporter		460	5	9	envelope-inner-integral	C	p2T(2); p3LM(2); p3T(1)	34.12 transport.metal
	AT2G15620.1	17	nitrite reductase (ferredoxin)		5997	98	194	plastid stroma	C	p1S(6); p3S(4); p2T(3); p3T(2); p2S(1); p3LM(1)	12.1.2 N-metabolism.nitrate metabolism.nitrite reductase
	AT2G15890.1	2	MEE14 (maternal effect embryo arrest 14)		209	2	3		C	p2S(1); p2T(1)	35.2 not assigned.unknown
	AT2G16600.1	1	peptidyl-prolyl cis-trans isomerase, cytosolic / cyclophilin / rotamase (ROC3) GI:1305455		154	2	3	not plastid	_	p2S(1)	29.6 protein.folding
	AT2G17265.1	6	homoserine kinase		1078	6	12	plastid	C	p3S(2); p2S(2); p3T(1); p3LM(1)	13.1.3.6.1.4 amino acid metabolism.synthesis.aspartate family.misc.homoserine.homoserine kinase
	AT2G17630.1	3	phosphoserine aminotransferase, putative		237	7	4		C	p3S(1); p2S(1); p1S(1)	13.1.5.1.2 amino acid metabolism.synthesis.serine-glycine-cysteine group.serine.phosphoserine aminotransferase
	AT2G17695.1	1	expressed protein		373	5	10		M	p3LM(1)	35.2 not assigned.unknown
	AT2G17972.1	3	expressed protein		150	3	4	thylakoid	C	p2T(2); p3T(1)	35.2 not assigned.unknown
	AT2G18710.1	3	cpSecY		373	6	8	thylakoid-integral	C	p2T(2); p3T(1)	29.3.3 protein.targeting.chloroplast
	AT2G19740.1	2	60S ribosomal protein L31 (RPL31A)		72	2	2	cytosol	_	p2S(1); p3S(1)	29.2.2 protein.synthesis.misc ribososomal protein
	AT2G19870.1	1	tRNA/rRNA methyltransferase (SpoU) family protein		79	1	1		M	p3S(1)	35.1 not assigned.no ontology
	AT2G19940.1	18	N-acetyl-gamma-glutamyl-phosphate reductase		3839	61	96	plastid stroma	_	p1S(9); p2S(4); p3S(2); p3T(1); p2T(1); p3LM(1)	13.1.2.3 amino acid metabolism.synthesis.glutamate family.arginine
	AT2G20260.1	10	psaE-2 subunit IV - stromal side		5420	27	42	thylakoid-peripheral-stromal-side	C	p2T(4); p3T(2); p2S(1); p3S(1); p1S(1); p3LM(1)	1.1.2.2 PS.lightreaction.photosystem I.PSI polypeptide subunits
	AT2G20270.1	10	glutaredoxin protein family		1336	17	29	plastid stroma	C	p1S(6); p3T(1); p3S(1); p2S(1); p3LM(1)	21.4 redox.glutaredoxins
	AT2G20670.1	1	unknown protein (Duf506)		36	1	1		_	p1S(1)	35.2 not assigned.unknown
	AT2G20690.1	7	riboflavin synthase alpha chain -related		464	8	13	plastid	C	p3S(5); p1S(2)	18.3.2 Co-factor and vitamine metabolism.riboflavin.riboflavin synthase
	AT2G20890.1	14	TF1 - thylakoid formation1		2240	35	64	envelope; plastid stroma; thylakoid-peripheral-stromal-side	C	p2T(6); p1S(3); p3T(2); p3S(1); p2S(1); p3LM(1)	29.3.3 protein.targeting.chloroplast
	AT2G21170.1	23	triosephosphate isomerase-1 (TPI-1)		7742	104	209	plastid stroma	C	p3S(8); p1S(6); p2T(3); p2S(2); p3T(2); p3LM(2)	1.3.5 PS.calvin cycle.TPI
	AT2G21280.1	1	GC1 (Giant Chloroplast 1) - plastid division		144	2	3	envelope-inner-peripheral-stromal-side	C	p3T(1)	31.2.5 cell.division.plastid
	AT2G21330.1	44	fructose-bisphosphate aldolase-1 (SFBA-1)		18840	235	345	plastid stroma; plastoglobules	C	p1S(15); p2S(9); p3S(9); p2T(6); p3T(4); p3LM(1)	1.3.6 PS.calvin cyle.aldolase
	AT2G21340.1	1	MatE domain protein (transport)		59	2	2		C	p3LM(1)	34 transport
	AT2G21370.1	6	xylulose kinase (DXK2)		669	8	12	plastid	M	p3S(2); p1S(2); p2S(1); p3LM(1)	3.7 minor CHO metabolism.sugar kinases
	AT2G21385.1	12	expressed protein		1117	25	39	plastid stroma	C	p1S(7); p3S(2); p2S(1); p3T(1); p3LM(1)	35.2 not assigned.unknown
	AT2G21530.1	14	unknown protein, forkhead domain		2026	30	47	plastid stroma; thylakoid-peripheral-stromal-side	C	p3S(5); p1S(4); p2T(2); p3T(1); p2S(1); p3LM(1)	35.1 not assigned.no ontology
	AT2G21660.1	3	glycine-rich RNA-binding protein (GRP7)		412	4	7	not plastid	_	p2T(3)	27.4 RNA.RNA binding
	AT2G21870.1	1	expressed protein		36	2	2		M	p3LM(1)	9.9 mitochondrial electron transport / ATP synthesis.F1-ATPase
	AT2G21960.1	3	expressed protein		517	5	10	plastid	C	p2T(2); p3T(1)	35.2 not assigned.unknown
	AT2G22230.1	10	beta-hydroxyacyl-ACP dehydratase, plastid		1285	30	38	plastid	C	p3S(5); p2T(2); p3T(1); p2S(1); p3LM(1)	11.1.5 lipid metabolism.FA synthesis and FA elongation.beta hydroxyacyl ACP dehydratase
	AT2G22250.1	5	aspartate aminotransferase		702	10	17	plastid	C	p1S(3); p2S(1); p3S(1)	13.1.1.2.1 amino acid metabolism.synthesis.central amino acid metabolism.aspartate.aspartate aminotransferase
	AT2G22360.1	5	DnaJ domain family		604	8	8	thylakoid	C	p1S(2); p3T(1); p2S(1); p2T(1)	26.29* misc. DnaJ domain with unknown function
	AT2G22450.1	3	riboflavin biosynthesis protein, putative		168	3	6	plastid	_	p1S(2); p2S(1)	18.3.1 Co-factor and vitamine metabolism.riboflavin.GTP cyclohydrolase II
	AT2G22780.1	2	peroxisomal NAD-malate dehydrogenase 1 (PMDH1)		187	2	2		_	p3T(1); p3LM(1)	6.3 gluconeogenesis.Malate DH
	AT2G23670.1	1	expressed protein		69	1	1	thylakoid	C	p3T(1)	35.1 not assigned.no ontology
	AT2G24020.1	11	expressed protein YbaB family (DUF149)		3630	39	61	plastid stroma	C	p1S(6); p2T(2); p2S(1); p3S(1); p3LM(1)	35.2 not assigned.unknown
	AT2G24060.1	2	translation initiation factor 3 (IF-3) family protein		214	2	2		C	p3S(1); p2S(1)	29.2.3 protein.synthesis.initiation
	AT2G24090.1	9	ribosomal protein L35 family protein		610	9	13	plastid ribosome	C	p1S(5); p3T(1); p3S(1); p2S(1); p3LM(1)	29.2.1.1 protein.synthesis.chloroplast/mito.plastid
	AT2G24820.1	8	Tic55 (putative Rieske iron-sulfur protein).		712	15	24	envelope-inner-integral	C	p3LM(4); p2T(2); p3T(1); p2S(1)	29.3.3 protein.targeting.chloroplast
	AT2G25080.1	22	glutathione peroxidase 2 (GPX2)		4726	100	169	plastid stroma	C	p1S(9); p3S(5); p2S(2); p3T(2); p2T(2); p3LM(2)	21.2 redox.ascorbate and glutathione
	AT2G25140.1	1	ClpB2		38	1	1		M	p2T(1)	29.6 protein.folding
	AT2G25830.1	10	YebC-related		1511	18	29	plastid stroma	C	p1S(7); p2S(1); p3S(1); p3LM(1)	35.1 not assigned.no ontology
	AT2G25840.1	6	Trp-tRNA synthetase (dual targeted - cTP/mTP)		416	7	8	mitochondria; plastid stroma	C	p2S(3); p3S(1); p1S(1); p3LM(1)	29.1 protein.aa activation
	AT2G26080.1	1	glycine dehydrogenase [decarboxylating]		96	4	2	mitochondria	M	p3LM(1)	13.2.5.2 amino acid metabolism.degradation.serine-glycine-cysteine group.glycine
	AT2G26340.1	6	expressed protein		1256	10	20	thylakoid	C	p3T(2); p3S(2); p2T(2)	35.2 not assigned.unknown
	AT2G26540.1	3	uroporphyrinogen-III synthase family protein (UROM)		483	3	7	plastid	C	p1S(2); p3S(1)	19.6 tetrapyrrole synthesis.uroporphyrinogen III synthase
	AT2G26670.1	6	heme oxygenase 1 - HO1 (Hy1)		457	7	14	plastid	C	p1S(3); p3S(2); p2S(1)	19.21 tetrapyrrole synthesis.heme oxygenase
	AT2G26930.1	3	ATCDPMEK (PIGMENT DEFECTIVE 277); 4-(cytidine 5'-diphospho)-2-C-methyl-D-erythritol kinase		191	3	4		C	p2S(2); p3T(1)	16.1.1.4 secondary metabolism.isoprenoids.non-mevalonate pathway.CMK
	AT2G27290.1	3	expressed protein		394	4	8	plastid	C	p2T(2); p3T(1)	35.2 not assigned.unknown
	AT2G27490.1	1	ATCOAE; ATP binding / dephospho-CoA kinase		46	1	1		_	p3LM(1)	35.1 not assigned.no ontology
	AT2G27680.1	17	aldo/keto reductase family		3857	59	98	plastid stroma	C	p1S(8); p3S(3); p2S(2); p2T(2); p3T(1); p3LM(1)	3.5 minor CHO metabolism.others
	AT2G27710.1	1	60S acidic ribosomal protein P2 (RPP2B)		144	2	3	cytosol	S	p3LM(1)	29.2.2 protein.synthesis.misc ribososomal protein
	AT2G28000.1	33	Cpn60-alpha-1		17630	218	449	plastid stroma	C	p1S(17); p3S(6); p2S(3); p2T(3); p3LM(3); p3T(1)	29.6 protein.folding
	AT2G28190.1	16	copper/zinc superoxide dismutase Cu,Zn-SOD (CSD2)		7255	62	148	plastid stroma; thylakoid-peripheral-stromal-side	C	p1S(6); p3S(5); p2T(2); p2S(1); p3T(1); p3LM(1)	21.6 redox.dismutases and catalases
	AT2G28605.1	5	PsbP domain - OEC23-like		512	10	12	thylakoid-peripheral-lumenal-side	C	p2T(2); p2S(1); p3T(1); p1S(1)	1.1.1.2 PS.lightreaction.photosystem II.PSII polypeptide subunits
	AT2G28900.1	1	OEP16 - HP15		142	2	2	envelope-outer	_	p1S(1)	34.8 transport.metabolite transporters at the envelope membrane
	AT2G29630.1	13	thiamine biosynthesis (thiC family)		1872	26	45	plastid stroma	C	p1S(6); p3S(3); p2S(2); p2T(1); p3LM(1)	18.2 Co-factor and vitamine metabolism.thiamine
	AT2G29690.1	8	ASA2 (anthranilate synthase 2); anthranilate synthase		422	8	11	plastid stroma	C	p1S(6); p3S(1); p2S(1)	13.1.6.5.1 amino acid metabolism.synthesis.aromatic aa.tryptophan.anthranilate synthase
	AT2G30170.1	3	expressed protein - protease phosphatase domain PP2C		589	8	15	plastid	C	p1S(2); p3S(1)	35.2 not assigned.unknown
	AT2G30200.1	8	malonyl-CoA:Acyl carrier protein transacylase		1640	25	43	plastid stroma	C	p1S(5); p3S(1); p2S(1); p3T(1)	11.1.2 lipid metabolism.FA synthesis and FA elongation.Acetyl CoA Transacylase
	AT2G30390.1	2	ferrochelatase II		352	3	6		C	p3T(2)	19.2 tetrapyrrole synthesis.ferrochelatase
	AT2G30695.1	15	similarity to Trigger factor		1488	27	43	plastid stroma	C	p3S(5); p1S(5); p2T(2); p2S(1); p3T(1); p3LM(1)	35.2 not assigned.unknown
	AT2G30860.1	15	glutathione S-transferase (AtGST9)		2592	41	90	not plastid	_	p3S(6); p1S(5); p2S(2); p3T(1); p3LM(1)	26.9 misc.glutathione S transferases
	AT2G30870.1	3	glutathione transferase -Phi class (ATGSTF10) - very abundant		267	7	11	not plastid	S	p1S(2); p3S(1)	26.9 misc.glutathione S transferases
	AT2G30930.1	1	expressed protein		125	1	1		C	p3LM(1)	35.2 not assigned.unknown
	AT2G30950.1	12	FtsH2 (VAR2 and Pftf)		10024	119	115	thylakoid-integral	C	p2T(6); p3T(4); p3S(1); p3LM(1)	29.5.7 protein.degradation.metalloprotease
	AT2G31170.1	2	Cys-tRNA synthetase class I (C) (dual targeted)		148	2	4	mitochondria; plastid stroma	C	p3S(1); p1S(1)	29.1.16 protein.aa activation.cysteine-tRNA ligase
	AT2G31610.1	1	40S ribosomal protein S3 (RPS3A)	9)	49	2	0	cytosol	_	p3LM(1)	29.2.2 protein.synthesis.misc ribososomal protein
	AT2G31670.1	12	expressed protein		2530	34	54	plastid stroma	M	p3S(5); p1S(4); p2S(2); p3LM(1)	35.2 not assigned.unknown
	AT2G31810.1	3	acetolactate synthase small subunit, putative		134	3	3		C	p1S(3)	13.1.4.1 amino acid metabolism.synthesis.branched chain group.common
	AT2G32290.1	1	beta-amylase 6 (BAM6)		81	1	1		_	p3LM(1)	2.2.2.1 major CHO metabolism.degradation.starch.starch cleavage
	AT2G32480.1	1	membrane zinc metalloprotease (M50)		320	4	1	envelope-inner	C	p3T(1)	29.5.7 protein.degradation.metalloprotease
	AT2G32520.1	1	dienelactone hydrolase family protein		122	1	2		_	p3S(1)	26.1 misc.misc2
	AT2G32640.1	3	expressed protein - lycopene cycle domain?		593	7	12	thylakoid	C	p2T(2); p3T(1)	35.2 not assigned.unknown
	AT2G33040.1	1	ATP synthase gamma chain, mitochondrial (ATPC)		109	1	1	mitochondria	M	p3LM(1)	9.9 mitochondrial electron transport / ATP synthesis.F1-ATPase
	AT2G33255.1	1	haloacid dehalogenase-like hydrolase		71	2	2		M	p1S(1)	35.1 not assigned.no ontology
	AT2G33430.1	3	DAG protein - affects maturation rRNA -		475	4	6	plastid	M	p2S(1); p3T(1); p2T(1)	27.1 RNA.processing
	AT2G33450.1	8	50S ribosomal protein L28, chloroplast (CL28)		505	13	16	plastid stroma	C	p1S(5); p3S(1); p2S(1); p3LM(1)	29.2.1.1 protein.synthesis.chloroplast/mito.plastid
	AT2G33800.1	11	30S Ribosomal p S5 Isolog L13		1466	19	34	plastid stroma	C	p1S(7); p2T(2); p3S(1); p2S(1)	29.2.1.1 protein.synthesis.chloroplast/mito.plastid
	AT2G34420.1	24	LHCII-1.5		11190	105	6	thylakoid-integral	C	p3T(9); p2T(8); p1S(4); p2S(2); p3LM(1)	1.1.1.1 PS.lightreaction.photosystem II.LHC-II
	AT2G34430.1	22	LHCII-1.4		13802	117	25	thylakoid-integral	C	p3T(10); p2T(6); p1S(4); p3S(1); p3LM(1)	1.1.1.1 PS.lightreaction.photosystem II.LHC-II
	AT2G34460.1	9	flavin reductase-related (3Beta_HSD;adh_short;DapB_N;GlutR_NAD_bind;Isoflavone_redu)		1435	20	37	plastoglobules	C	p1S(3); p3T(2); p2T(2); p3S(1); p3LM(1)	35.1 not assigned.no ontology
	AT2G34640.1	1	expressed protein (pTAC12)		93	1	1	plastid nucleoid	C	p2T(1)	28.3* DNA.plastid nucleoid interacting
	AT2G34860.1	2	DnaJ central domain (4 repeats)		222	2	4		C	p2T(2)	26.29* misc. DnaJ domain with unknown function
	AT2G35040.1	8	AICARFT/IMPCHase bienzyme family protein		1036	24	38	plastid stroma	C	p1S(3); p3S(2); p2S(2); p3LM(1)	23.1.2.9 nucleotide metabolism.synthesis.purine.AICAR transformylase and IMP synthase
	AT2G35410.1	12	putative RNA binding protein		2833	41	72	plastid stroma	C	p1S(6); p2T(2); p3S(1); p3T(1); p2S(1); p3LM(1)	27.4 RNA.RNA binding
	AT2G35450.1	4	expressed protein- domain Amidohydrolase 2 (InterPro:IPR006992)		274	5	7	plastid stroma	C	p1S(3); p3S(1)	35.1 not assigned.no ontology
	AT2G35490.1	5	fibrillin (FIB2)		817	12	19	plastoglobules; thylakoid-peripheral-stromal-side	C	p2T(3); p2S(1); p3T(1)	26.31* misc. fibrillins
	AT2G35500.1	8	shikimate kinase-related		969	13	21	plastid stroma	C	p1S(6); p3S(1); p2S(1)	13.1.6.1.5 amino acid metabolism.synthesis.aromatic aa.chorismate.shikimate kinase
	AT2G36145.1	4	expressed protein		314	4	8	thylakoid	C	p2T(2); p3S(1); p2S(1)	35.2 not assigned.unknown
	AT2G36230.1	2	phosphoribosylformimino-5-aminoimidazole carboxamide ribotide isomerase		110	2	3		M	p2S(1); p3S(1)	13.1.7.4 amino acid metabolism.synthesis.histidine.N-5-phosphoribosyl-formimino-5-aminoimidazole-4-carboxamide ribonucleotide isomerase
	AT2G36250.1	6	FtsZ2.1 plastid division - tubulin motifs		1465	10	16	plastid stroma	C	p2S(2); p3S(2); p1S(1); p3LM(1)	31.2.5 cell.division.plastid
	AT2G36390.1	11	1,4-alpha-glucan branching enzyme SBEII (starch branching enzyme class II/sbe2-1)		2818	58	80	plastid stroma	C	p1S(6); p2S(2); p3S(2); p3LM(1)	2.1.2.3 major CHO metabolism.synthesis.starch.starch branching
	AT2G37020.1	2	translin family protein		78	2	2		_	p1S(2)	35.1 not assigned.no ontology
	AT2G37080.1	2	unknown protein		78	2	2		C	p3S(2)	35.2 not assigned.unknown
	AT2G37190.1	1	60S ribosomal protein L12 (RPL12A)	10)	94	2	0	cytosol	_	p3LM(1)	29.2.2 protein.synthesis.misc ribososomal protein
	AT2G37220.1	14	RNA binding protein CP29 B'		4749	41	73	plastid stroma	C	p1S(4); p3S(3); p3T(2); p2S(2); p2T(2); p3LM(1)	27.4 RNA.RNA binding
	AT2G37240.1	9	expressed protein		918	9	16	plastid stroma	C	p3S(5); p1S(3); p2S(1)	35.2 not assigned.unknown
	AT2G37270.1	1	40S ribosomal protein S5 (RPS5A)		208	2	4	cytosol	_	p3LM(1)	29.2.2 protein.synthesis.misc ribososomal protein
	AT2G37500.1	9	glutamate/ornithine acetyltransferase -related		980	14	18	plastid stroma	C	p3S(4); p1S(4); p2S(1)	13.1.2.3.2 amino acid metabolism.synthesis.glutamate family.arginine.acetylglutamate kinase
	AT2G37660.1	11	3-beta-hydroxy-delta5-steroid dehydrogenase/epimerase domain		6006	74	143	plastid stroma	C	p2S(3); p1S(3); p3S(2); p3LM(2); p3T(1)	35.2 not assigned.unknown
	AT2G37690.1	5	phosphoribosylaminoimidazole carboxylase		627	14	21	plastid	C	p1S(2); p2S(1); p3S(1); p3LM(1)	23.1.2.6 nucleotide metabolism.synthesis.purine.AIR carboxylase
	AT2G37720.1	2	unknown protein - DUF231 domain		98	2	3		_	p3T(1); p2T(1)	35.2 not assigned.unknown
	AT2G37860.1	2	LCD1 (LOWER CELL DENSITY 1)		302	3	5		C	p3LM(2)	33.99 development.unspecified
	AT2G38040.1	11	putative alpha-carboxyltransferase ;		3277	60	85	envelope-inner	C	p1S(3); p2S(2); p3S(2); p2T(2); p3T(1); p3LM(1)	16.99 secondary metabolism.unspecified
	AT2G38140.1	3	PSRP-4 associates with 30S		268	5	8	plastid stroma	C	p2S(1); p3T(1); p3S(1)	29.2.1.99 protein.synthesis.chloroplast/mito.unknown
	AT2G38270.1	9	CAX-interacting protein, CAXIP1-like, glutaredoxin-related protein		930	21	32	plastid stroma	C	p1S(5); p3S(2); p2S(1); p3LM(1)	34.21 transport.calcium
	AT2G38550.1	2	putative non-green plastid inner envelope membrane protein		263	3	5	envelope-inner-integral	C	p3T(1); p3LM(1)	35.2 not assigned.unknown
	AT2G39080.1	3	expressed protein		173	4	5	plastid stroma	C	p1S(2); p3S(1)	35.2 not assigned.unknown
	AT2G39290.1	1	Phosphatidylglycero-phosphate synthase 1 (PGP1)-dual targeted		301	3	5	mitochondria; plastid	C	p3LM(1)	11.3 lipid metabolism.Phospholipid synthesis; 11.1 lipid metabolism.glycolipid synthesis
	AT2G39470.1	4	OEC23-like Tat lTP		1416	18	37	thylakoid-peripheral-lumenal-side	C	p3T(2); p2T(2)	1.1.1.2 PS.lightreaction.photosystem II.PSII polypeptide subunits
	AT2G39730.1	91	Rubisco activase		78176	827	1894	plastid stroma	C	p1S(35); p2T(15); p3S(14); p2S(13); p3T(8); p3LM(6)	1.3.13 PS.calvin cyle.rubisco interacting
	AT2G39930.1	6	isoamylase 1 (starch debranching enzyme) (AtlSA1)		467	10	14	plastid	C	p1S(3); p2S(1); p3S(1); p3LM(1)	2.1.2.4 major CHO metabolism.synthesis.starch.debranching
	AT2G40100.1	5	LHCII-4.3 -CP29		990	15	23	thylakoid-integral	C	p3T(2); p2T(2); p3S(1)	1.1.1.1 PS.lightreaction.photosystem II.LHC-II
	AT2G40300.1	9	Ferritin-4		821	16	19	plastid stroma	C	p3S(5); p2S(2); p3T(1); p3LM(1)	15.2 metal handling.binding, chelation and storage
	AT2G40490.1	13	uroporphyrinogen decarboxylase (UPD)		3948	70	108	plastid stroma	C	p1S(6); p2S(3); p3S(2); p2T(1); p3LM(1)	19.7 tetrapyrrole synthesis.uroporphyrinogen decarboxylase
	AT2G40925.1	1	F-box family protein		39	1	1		_	p2S(1)	29.5.11.4.3.2 protein.degradation.ubiquitin.E3.SCF.FBOX
	AT2G41040.1	1	Ubie_methyl transferase - SAM-dependent methyltransferase		85	2	2	plastoglobules	C	p3T(1)	35.1 not assigned.no ontology
	AT2G41220.1	4	ferredoxin-dependent glutamate synthase (glu2 or Fd-GOGAT 2)		1570	29	16	plastid stroma	C	p1S(3); p2S(1)	12.2.1 N-metabolism.ammonia metabolism.glutamate synthase
	AT2G41560.1	1	calcium-transporting ATPase 4, plasma membrane-type / Ca2+-ATPase, isoform 4 (ACA4), identical to SP:O22218 Calcium-transporting ATPase 4, plasma membrane-type (EC 3.6.3.8) (Ca(2+)-ATPase isoform 4) {Arabidopsis thaliana} Belongs to plant 2B ATPase-		183	1	2		_	p3LM(1)	30.3 signalling.calcium
	AT2G41670.1	2	GTP-binding family protein		85	2	2		_	p3T(1); p2T(1)	35.1 not assigned.no ontology
	AT2G41680.1	12	AtNTRC - NADPH reductase - oxidative stress defense		1802	28	44	plastid stroma	C	p1S(7); p3S(3); p2S(2)	21.1 redox.thioredoxin
	AT2G41950.1	1	expressed protein		271	4	6	plastid stroma	C	p3S(1)	35.2 not assigned.unknown
	AT2G42130.4	14	fibrillin (FIB7b) - model .4 scores better than models 1-3 and 5		2962	46	76	thylakoid-peripheral-stromal-side	_	p1S(5); p3T(2); p3S(2); p2T(2); p3LM(2); p2S(1)	26.31* misc. fibrillins
	AT2G42210.1	1	mitochondrial import inner membrane translocase subunit Tim17/Tim22/Tim23 family protein, weak similarity to SP:P25710 NADH-ubiquinone oxidoreductase 21.3 kDa subunit (EC 1.6.5.3) (EC 1.6.99.3) {Neurospora crassa}, SP:Q12328 Mitochondrial import inne		66	1	1		_	p3LM(1)	29.3.2 protein.targeting.mitochondria
	AT2G42220.1	8	rhodanese-like domain protein		1201	20	30	thylakoid	C	p2T(5); p3T(2); p1S(1)	26.23 misc.rhodanese
	AT2G42530.1	1	cold-regulated protein (cor15b)		46	1	1	plastid stroma	C	p1S(1)	20.2.2 stress.abiotic.cold
	AT2G42540.1	3	cold-regulated protein (cor15a)		164	4	4	plastid stroma	M	p3S(1); p2S(1); p1S(1)	20.2.2 stress.abiotic.cold
	AT2G42600.1	3	ATPPC2 (PHOSPHOENOLPYRUVATE CARBOXYLASE 2); phosphoenolpyruvate carboxylase		143	5	5		_	p1S(2); p2S(1)	4.14 glycolysis.PEPCase
	AT2G42770.1	5	peroxisomal membrane protein family (22 kDa)		327	5	7	envelope	_	p3S(2); p2S(1); p2T(1); p3LM(1)	35.1 not assigned.no ontology
	AT2G42975.1	3	expressed protein		126	3	3		C	p2T(2); p3T(1)	35.2 not assigned.unknown
	AT2G43030.1	13	50S ribosomal protein L3		4065	61	110	plastid ribosome	C	p1S(4); p2S(3); p3T(2); p2T(2); p3S(1); p3LM(1)	29.2.1.1 protein.synthesis.chloroplast/mito.plastid
	AT2G43090.1	8	aconitase		1509	18	31	plastid stroma	C	p1S(4); p2S(2); p3S(1); p3LM(1)	8.2.4 TCA / org. transformation.other organic acid transformaitons.aconitase
	AT2G43180.1	5	expressed protein		263	5	6		C	p1S(4); p3LM(1)	35.2 not assigned.unknown
	AT2G43560.1	7	FKBP-type peptidyl-prolyl cis-trans isomerase		906	20	29	thylakoid-peripheral-lumenal-side	C	p3T(2); p3S(2); p2T(2); p2S(1)	29.6 protein.folding
	AT2G43630.1	4	expressed protein		443	6	11	plastid	C	p3T(1); p2S(1); p2T(1); p3LM(1)	35.2 not assigned.unknown
	AT2G43710.1	13	acyl-[acyl-carrier-protein] desaturase-1 (stearoyl-ACP desaturase)		1857	28	43	plastid stroma	C	p1S(7); p2S(4); p3S(1); p3LM(1)	11.1.15 lipid metabolism.FA synthesis and FA elongation.ACP desaturase
	AT2G43750.1	21	cysteine synthase		10360	159	291	plastid stroma	C	p1S(8); p2S(4); p2T(4); p3S(3); p3T(1); p3LM(1)	13.1.5.3.1 amino acid metabolism.synthesis.serine-glycine-cysteine group.cysteine.OASTL
	AT2G43945.1	7	expressed protein		2488	32	48	plastid stroma	C	p3S(4); p1S(2); p2S(1)	35.2 not assigned.unknown
	AT2G44040.1	2	dihydrodipicolinate reductase - very similar to AT3G59890	11)	273	5	0	plastid stroma	C	p3S(1); p1S(1)	13.1.3.5.2 amino acid metabolism.synthesis.aspartate family.lysine.dihydrodipicolinate reductase
	AT2G44050.1	9	6,7-dimethyl-8-ribityllumazine (DMRL) synthase (COS1) (vit B2 synthesis)		1144	17	29	plastid	C	p1S(5); p3T(1); p2S(1); p3S(1); p3LM(1)	18.3.2 Co-factor and vitamine metabolism.riboflavin.riboflavin synthase
	AT2G44120.1	1	60S ribosomal protein L7 (RPL7C)		235	3	2	cytosol	_	p3LM(1)	29.2.2 protein.synthesis.misc ribososomal protein
	AT2G44350.1	1	citrate synthase		100	1	2		M	p3LM(1)	8.1.2 TCA / org. transformation.TCA.CS
	AT2G44640.1	4	expressed protein		542	7	9	envelope	C	p2T(2); p3T(1); p3LM(1)	35.2 not assigned.unknown
	AT2G44650.1	10	Cpn10-1		1871	17	35	plastid stroma	C	p1S(6); p3S(1); p2S(1); p3T(1); p3LM(1)	29.6 protein.folding
	AT2G44870.1	1	contains InterPro domain Sigma factor, regions 3 and 4; (InterPro:IPR013324)		65	1	1		M	p2T(1)	35.2 not assigned.unknown
	AT2G44920.1	4	thylakoid lumen pentapeptide repeat		924	6	8	thylakoid-peripheral-lumenal-side	C	p3T(1); p2S(1); p2T(1); p3LM(1)	26.54* misc. Pentapeptide repeat (PPR) unknown function
	AT2G45290.1	3	transketolase-2 (TKL-2)		1137	23	10		C	p1S(3)	1.3.8 PS.calvin cyle.transketolase; 7.2.1 OPP.non-reductive PP.transketolase
	AT2G45300.1	1	3-phosphoshikimate 1-carboxyvinyltransferase (EPSP synthase)		44	1	1		C	p1S(1)	13.1.6.1.6 amino acid metabolism.synthesis.aromatic aa.chorismate.5-enolpyruvylshikimate-3-phosphate synthase
	AT2G45740.1	1	peroxisomal biogenesis factor 11 family protein / PEX11 family protein, contains Pfam profile PF05648: Peroxisomal biogenesis factor 11 (PEX11)		80	2	2		S	p3LM(1)	35.1 not assigned.no ontology
	AT2G45770.1	9	cpFtsY		1089	18	28	thylakoid-peripheral-stromal-side	C	p1S(5); p2S(1); p3T(1); p3S(1); p3LM(1)	29.3.3 protein.targeting.chloroplast
	AT2G45990.1	9	expressed protein		1367	24	40	plastid stroma	_	p1S(5); p3S(2); p2S(1); p3LM(1)	35.2 not assigned.unknown
	AT2G46820.1	6	Photosystem I protein TMP14 - PSI-P (also pTAC8)		1080	9	21	thylakoid	C	p2T(2); p3T(1); p2S(1); p3S(1); p3LM(1)	1.1.2.2 PS.lightreaction.photosystem I.PSI polypeptide subunits
	AT2G46910.1	3	fibrillin (FIB8)		318	4	7	plastoglobules	C	p3T(2); p1S(1)	26.31* misc. fibrillins
	AT2G47390.1	16	thylakoid associated glutamyl endopeptidase (cGEP) (AARE2,3)		3376	75	118	plastid stroma	C	p1S(7); p3S(3); p2S(2); p2T(2); p3T(1); p3LM(1)	29.5.5 protein.degradation.serine protease
	AT2G47400.1	3	CP12 protein		490	5	8		C	p1S(3)	35.1 not assigned.no ontology
	AT2G47450.1	5	cpSRP43		508	8	13	plastid stroma	C	p2S(2); p3T(1); p3S(1); p3LM(1)	29.3.3 protein.targeting.chloroplast
	AT2G47730.1	13	glutathione transferase (GST6) - very abundant		3677	56	86		C	p3S(5); p1S(5); p2S(2); p3LM(1)	26.9 misc.glutathione S transferases
	AT2G47840.1	7	IEP16 (low homology TIC20)		814	14	23	envelope-inner-integral	C	p3S(2); p2T(2); p3T(1); p2S(1); p3LM(1)	29.3.3 protein.targeting.chloroplast
	AT2G47910.1	13	chlororespiratory reduction 6 (CRR6) - needed for thylakoid NDH complex accumulation		1892	37	55	plastid stroma	M	p3S(5); p1S(5); p2S(2); p3LM(1)	29.8 protein assembly and cofactor ligation
	AT2G47940.1	14	DegP2 - HhoA homologue or DegQ		2124	40	66	plastid stroma	C	p1S(6); p3S(3); p2S(3); p2T(1); p3LM(1)	29.5.5 protein.degradation.serine protease
	AT2G48070.1	2	expressed protein		138	2	2		C	p2T(2)	35.2 not assigned.unknown
	AT3G01120.1	1	chloroplast cystathionine gamma-synthase, O-succinylhomoserine (Thiol)-lyase (CGS) - also MTO1 (METHIONINE OVERACCUMULATION 1)		36	1	1		C	p1S(1)	13.1.3.4.2 amino acid metabolism.synthesis.aspartate family.methionine.cystathionine beta-lyase
	AT3G01180.1	1	glycogen synthase, putative		70	1	1		C	p3T(1)	2.1.2.2 major CHO metabolism.synthesis.starch.starch synthase
	AT3G01280.1	1	porin -related		79	1	1		_	p3LM(1)	34.2 transport.porins
	AT3G01440.1	2	PsbQ domain Tat lTP		687	7	14	thylakoid-peripheral-lumenal-side	C	p3T(1); p2T(1)	1.1.1.2 PS.lightreaction.photosystem II.PSII polypeptide subunits
	AT3G01480.1	14	Tlp-40		4973	66	118	thylakoid-peripheral-lumenal-side	C	p1S(5); p2T(4); p2S(2); p3S(1); p3T(1); p3LM(1)	29.6 protein.folding
	AT3G01500.1	68	beta carbonic anhydrase-1 (beta CA1) - the gene model is incorrect - it lacks the cTP		41603	406	1230	plastid stroma	_	p1S(26); p3S(13); p2S(12); p3T(6); p3LM(6); p2T(5)	8.3 TCA / org. transformation.carbonic anhydrases
	AT3G01510.1	6	phosphatase; starch binding?		317	7	8	plastid stroma	C	p1S(4); p3S(2)	26.13 misc.acid and other phosphatases
	AT3G02090.1	1	mitochondrial processing peptidase (M16)		93	1	2	mitochondria	M	p3LM(1)	29.5 protein.degradation
	AT3G02560.1	1	40S ribosomal protein S7 (RPS7B)		69	1	1	cytosol	_	p3LM(1)	29.2.2 protein.synthesis.misc ribososomal protein
	AT3G02630.1	6	acyl-[acyl-carrier-protein] desaturase-2 (stearoyl-ACP desaturase)		727	12	14	plastid	C	p1S(4); p2S(1); p3S(1)	11.1.15 lipid metabolism.FA synthesis and FA elongation.ACP desaturase
	AT3G02660.1	2	tRNA synthetase class I (W and Y) (dual targeted- cTP/mTP)		378	5	7	mitochondria; plastid stroma	C	p3S(1); p2S(1)	29.1.1 protein.aa activation.tyrosine-tRNA ligase
	AT3G02690.1	1	integral membrane family (Duf6)		77	1	1		C	p3T(1)	35.2 not assigned.unknown
	AT3G02730.1	12	thioredoxin f1 (Trx F1)		1206	23	36	plastid stroma; thylakoid-peripheral-stromal-side	C	p1S(6); p3S(2); p2T(2); p2S(1); p3LM(1)	21.1 redox.thioredoxin
	AT3G02780.1	1	isopentenyl-diphosphate delta-isomerase II (IPP2)		186	2	2		C	p3S(1)	16.1.2.7 secondary metabolism.isoprenoids.mevalonate pathway.isopentenyl pyrophosphate:dimethyllallyl pyrophosphate isomerase
	AT3G03630.1	1	(chloroplast) cysteine synthase 2 (CS26		72	1	1		C	p1S(1)	13.1.5.3.1 amino acid metabolism.synthesis.serine-glycine-cysteine group.cysteine.OASTL
	AT3G03710.1	11	3'-5' exoribonuclease (RIF10 also named RNR1)		3823	72	118	plastid stroma	C	p1S(6); p3T(1); p3S(1); p2S(1); p2T(1); p3LM(1)	27.1.19 RNA.processing.ribonucleases
	AT3G03780.1	5	methionine synthase (AtMS2)		1185	30	13		_	p1S(3); p3S(1); p2S(1)	13.1.3.4.3 amino acid metabolism.synthesis.aspartate family.methionine.methionine synthase
	AT3G03810.1	1	EDA30 (embryo sac development arrest 30) (duf246)		38	1	2		S	p3LM(1)	33.99 development.unspecified
	AT3G04260.1	5	SAP domain-containing protein (pTAC3)		397	5	7	plastid	C	p1S(4); p2S(1)	28.3* DNA.plastid nucleoid interacting
	AT3G04340.1	3	FtsH protease family (new plastid member)		300	8	12	plastid	_	p2S(1); p2T(1); p3LM(1)	29.5.7 protein.degradation.metalloprotease
	AT3G04550.1	5	expressed protein		667	10	14	plastid stroma	C	p3S(2); p2S(1); p1S(1); p3LM(1)	35.2 not assigned.unknown
	AT3G04790.1	22	ribose 5-phosphate isomerase (PRI)		8482	122	267	plastid stroma; thylakoid-peripheral-stromal-side	C	p3S(8); p1S(5); p2S(3); p2T(3); p3T(2); p3LM(1)	1.3.10 PS.calvin cyle.Rib5P Isomerase; 7.2.4 OPP.non-reductive PP.ribose 5-phosphate isomerase
	AT3G04870.1	7	zeta-carotene desaturase (ZDS) [carotene 7\,8-desaturase]		632	13	19	plastid	C	p1S(5); p3S(1); p2S(1)	16.1.4 secondary metabolism.isoprenoids.carotenoids
	AT3G05350.1	15	aminopeptidase (M24) (APP2)		2533	43	66	plastid stroma	_	p1S(5); p2S(3); p3S(3); p2T(2); p3T(1); p3LM(1)	29.5 protein.degradation
	AT3G05590.1	1	60S ribosomal protein L18 (RPL18B), similar to GB:P42791	12)	81	2	0	cytosol	_	p3LM(1)	29.2.2 protein.synthesis.misc ribososomal protein
	AT3G05625.1	3	expressed protein (TPR)		150	3	4	plastid	C	p1S(2); p2S(1)	26.33* misc. tetratricopeptide repeat (TPR) unknown function
	AT3G06350.1	5	dehydroquinate dehydratase, putative / shikimate dehydrogenase		490	14	20	plastid	C	p1S(3); p3S(1); p2S(1)	13.1.6.1.10 amino acid metabolism.synthesis.aromatic aa.chorismate.dehydroquinate/shikimate dehydrogenase
	AT3G06510.1	7	glycosyl hydrolase family 1		1189	19	28	envelope	S	p2T(2); p3LM(2); p3S(1); p3T(1); p2S(1)	26.3 misc.gluco-, galacto- and mannosidases
	AT3G06530.1	2	unknown protein - BP28CT (NUC211) domain		75	2	2		S	p2S(1); p3S(1)	35.1 not assigned.no ontology
	AT3G06730.1	5	thioredoxin family protein		262	5	9	plastid	C	p2T(2); p1S(2); p3T(1)	21.1 redox.thioredoxin
	AT3G06960.1	1	PDE320 (PIGMENT DEFECTIVE 320)		89	1	1		_	p3LM(1)	35.2 not assigned.unknown
	AT3G06980.1	1	DEAD/DEAH box helicase		39	1	1		C	p1S(1)	27.5* RNA. DEAD/DEAH BOX helicase
	AT3G07430.1	1	YGGT family protein		92	1	2		C	p3LM(1)	35.1 not assigned.no ontology
	AT3G07700.1	2	ABC1 kinase family		125	2	2		_	p3T(1); p2T(1)	26.56* misc.ABC1k family
	AT3G08530.1	1	clathrin heavy chain, putative, similar to Swiss-Prot:Q00610 clathrin heavy chain 1 (CLH-17) (Homo sapiens)	13)	363	7	0		_	p3LM(1)	31.4 cell. vesicle transport
	AT3G08580.1	3	mitochondrial ADP,ATP carrier protein 1		908	10	19	mitochondria	_	p3LM(2); p3T(1)	34.9 transport.metabolite transporters at the mitochondrial membrane
	AT3G08640.1	3	glycine-rich protein		448	4	7		C	p3LM(2); p3T(1)	35.1 not assigned.no ontology
	AT3G08740.1	13	elongation factor P (EF-P)		4359	71	128	plastid stroma	C	p3S(4); p1S(3); p2S(2); p2T(2); p3T(1); p3LM(1)	29.2.4 protein.synthesis.elongation
	AT3G08840.2	2	D-alanine--D-alanine ligase family		92	2	3		_	p1S(2)	35.1 not assigned.no ontology
	AT3G08920.1	3	rhodanese-like domain-containing protein		1080	18	28	thylakoid	M	p2T(2); p3T(1)	26.23 misc.rhodanese
	AT3G08940.2	22	LHCII-4.2 - CP29 - model .2 is better than model .1		8672	100	170	thylakoid-integral	C	p2T(11); p3T(5); p1S(3); p2S(1); p3S(1); p3LM(1)	1.1.1.1 PS.lightreaction.photosystem II.LHC-II
	AT3G09050.1	2	expressed protein		87	2	2	thylakoid	C	p3T(1); p2T(1)	35.2 not assigned.unknown
	AT3G09250.1	5	DNA binding / nuclease		631	5	8		C	p3S(4); p2S(1)	35.2 not assigned.unknown
	AT3G09580.1	3	amine oxidase family		309	6	9	plastid	C	p2T(2); p2S(1)	16.1.4 secondary metabolism.isoprenoids.carotenoids
	AT3G10060.1	6	Isomerases TAT lTP		951	12	23	thylakoid-peripheral-lumenal-side	C	p2T(2); p2S(1); p3S(1); p3T(1); p3LM(1)	29.6 protein.folding
	AT3G10130.1	1	SOUL heme-binding		128	2	3	plastoglobules	C	p3T(1)	21.2 redox.heme
	AT3G10350.1	13	anion-transporting ATPase family protein,		1234	24	36	plastid	C	p1S(6); p2S(3); p3T(1); p3S(1); p2T(1); p3LM(1)	34.18.1 transport.unspecified anions.arsenite-transporting ATPase
	AT3G10420.2	1	unknown protein		47	1	1		C	p3S(1)	35.1 not assigned.no ontology
	AT3G10670.1	7	AtNAP7 - ABC proteins - plastidic SufC-like - Fe-S cluster maintenance		400	10	14	plastid stroma	C	p1S(4); p2S(1); p3S(1); p3LM(1)	14 S-assimilation
	AT3G10690.1	3	DNA gyrase subunit A family (TAC)		248	5	7	plastid	C	p2T(2); p3T(1)	28.2 DNA.repair
	AT3G10790.1	2	F-box family protein		87	2	2		_	p2S(1); p2T(1)	29.5.11.4.3.2 protein.degradation.ubiquitin.E3.SCF.FBOX
	AT3G10940.1	3	protein phosphatase-related		167	3	3		C	p2S(1); p3S(1); p3LM(1)	35.2 not assigned.unknown
	AT3G11170.1	1	Plastidial Linoleate Desaturase (FAD7/FAD8) (Lipid Gene Database: Beisson)		139	1	2	envelope-inner-integral	C	p3LM(1)	11.2.3 lipid metabolism.FA desaturation.omega 3 desaturase
	AT3G11560.1	1	expressed protein		50	1	1		C	p3LM(1)	35.2 not assigned.unknown
	AT3G11630.1	38	2-Cys Peroxiredoxin A (Prx A; formerly named BAS1)		17217	212	225	plastid stroma; thylakoid-peripheral-stromal-side	C	p1S(16); p3S(9); p2S(4); p3LM(4); p3T(3); p2T(2)	21.5 redox.periredoxins
	AT3G11950.1	1	homogentisate solanesyltransferase (AtHST) (psds2)		94	1	2		_	p3LM(1)	16.1 secondary metabolism.isoprenoids
	AT3G12290.1	2	C1 tetrahydrofolate dehydrogenase/cyclohydrolase, putative		73	2	2		_	p1S(2)	25.5 C1-metabolism.Methylenetetrahydrofolate dehydrogenase & Methenyltetrahydrofolate cyclohydrolase
	AT3G12345.1	3	expressed protein		212	5	8	thylakoid	M	p2T(2); p3T(1)	35.2 not assigned.unknown
	AT3G12780.1	67	phosphoglycerate kinase-1 (PGK-1)		44530	563	805	plastid stroma	C	p1S(27); p2S(13); p3S(13); p2T(8); p3LM(4); p3T(2)	1.3.3 PS.calvin cyle.phosphoglycerate kinase; 4.1 glycolysis.phosphoglycerate kinase
	AT3G12930.1	4	Iojap-related		632	5	8	plastid stroma	C	p3S(2); p2S(1); p1S(1)	35.2 not assigned.unknown
	AT3G13120.1	8	30S ribosomal protein S10		1087	23	38	plastid ribosome	C	p3S(4); p3T(1); p2S(1); p2T(1); p3LM(1)	29.2.1.1 protein.synthesis.chloroplast/mito.plastid
	AT3G13470.1	22	Cpn60-beta-1		14975	170	11	plastid stroma	C	p1S(13); p3S(4); p2S(4); p3LM(1)	29.6 protein.folding
	AT3G13490.1	7	tRNA synthetase class II (D, K and N) protein (dual targeted cTP/mTP)		445	11	14	mitochondria; plastid stroma	M	p1S(3); p3S(2); p2S(1); p3LM(1)	29.1.6 protein.aa activation.lysine-tRNA ligase
	AT3G14110.1	3	Flu gene - TPR motif, regulation tetrapyrole biosynthesis		667	10	16	envelope-inner; thylakoid	C	p2T(2); p3T(1)	19.4 tetrapyrrole synthesis.regulation
	AT3G14210.1	12	GDSL-like Lipase/Acylhydrolase - very abundant		3080	34	65		S	p2T(4); p3LM(3); p3T(2); p3S(2); p2S(1)	16.5.1 secondary metabolism.sulfur-containing.glucosinolates
	AT3G14415.1	7	glycolate oxidase-1 (GOX-1)		935	24	12	peroxisome	_	p2S(2); p3S(1); p3T(1); p2T(1); p1S(1); p3LM(1)	1.2.2 PS.photorespiration.glycolate oxydase
	AT3G14420.1	10	glycolate oxidase-2 (GOX-2)		1589	42	36	peroxisome	_	p1S(4); p3S(2); p2S(2); p3T(1); p3LM(1)	1.2.2 PS.photorespiration.glycolate oxydase
	AT3G14900.1	2	zinc finger protein-related		86	2	3		C	p1S(2)	35.2 not assigned.unknown
	AT3G14930.1	11	uroporphyrinogen decarboxylase (UPD)		1219	29	38	plastid stroma	C	p1S(5); p2S(3); p3S(2); p3LM(1)	19.7 tetrapyrrole synthesis.uroporphyrinogen decarboxylase
	AT3G15190.1	15	30S ribosomal protein S20		3345	41	82	plastid ribosome	C	p3S(5); p1S(4); p2S(2); p2T(2); p3T(1); p3LM(1)	29.2.1.1 protein.synthesis.chloroplast/mito.plastid
	AT3G15360.1	9	thioredoxin m4		779	17	27	plastid stroma; thylakoid-peripheral-stromal-side	C	p1S(4); p2S(1); p3T(1); p3S(1); p2T(1); p3LM(1)	21.1 redox.thioredoxin
	AT3G15520.1	8	peptidyl-prolyl cis-trans isomerase TLP38		1500	20	30	thylakoid-peripheral-lumenal-side	C	p2S(2); p2T(2); p1S(2); p3T(1); p3S(1)	29.6 protein.folding
	AT3G15690.1	2	biotin carboxylase (BC) - part of ACCase complex		180	4	6	envelope-inner-peripheral-stromal-side	C	p1S(2)	11.1.1 lipid metabolism.FA synthesis and FA elongation.Acetyl CoA Carboxylation
	AT3G15730.1	1	phospholipase D alpha 1 / PLD alpha 1 (PLDALPHA1) (PLD1)		55	1	1		_	p1S(1)	11.9.3.1 lipid metabolism.lipid degradation.lysophospholipases.phospholipase D
	AT3G15840.1	7	PIFI (post-illumination chl fluorescence increase)		304	8	10	plastid	C	p3S(3); p3T(2); p2T(1); p1S(1)	1.1.40 PS.lightreaction.cyclic electron flow-chlororespiration
	AT3G15900.1	2	expressed protein		92	2	3		C	p2T(2)	35.2 not assigned.unknown
	AT3G16000.1	3	MFP1 - nucleoid binding		1769	32	57	plastid nucleoid	C	p2T(2); p3T(1)	28.3* DNA.plastid nucleoid interacting
	AT3G16140.1	2	psaH-1 - subunit VI		1323	8	4	thylakoid-integral	C	p3T(1); p2T(1)	1.1.2.2 PS.lightreaction.photosystem I.PSI polypeptide subunits
	AT3G16290.1	2	FtsH - new plastid member		479	7	11	plastid	C	p2T(1); p3LM(1)	29.5.7 protein.degradation.metalloprotease
	AT3G16390.1	1	jacalin lectin family protein		39	1	1		_	p2T(1)	17.7.3 hormone metabolism.jasmonate.induced-regulated-responsive-activated
	AT3G16470.1	2	JR1 (Jacalin lectin family protein)		343	2	4		_	p3S(1); p3LM(1)	17.7.3 hormone metabolism.jasmonate.induced-regulated-responsive-activated
	AT3G16640.1	2	TCTP homolog - tumor protein homologue		141	2	3		_	p3S(2)	35.2 not assigned.unknown
	AT3G17040.1	1	HCF107 TPR - psbH expression (mbb1 homol, C. reinharditii.)		82	1	1	plastid stroma	C	p2T(1)	27.1 RNA.processing
	AT3G17810.1	6	dihydropyrimidine dehydrogenase (DHODH); homologue of C reinhardtii Tba1; translation D1 proteins		554	10	14	plastid	C	p1S(4); p2S(1); p3S(1)	23.2 nucleotide metabolism.degradation
	AT3G17820.1	2	glutamine synthetase		108	2	2		_	p1S(2)	12.2.2 N-metabolism.ammonia metabolism.glutamine synthase
	AT3G17970.1	1	TPR protein (homology to Toc64V)		201	2	4		S	p3LM(1)	26.33* misc. tetratricopeptide repeat (TPR) unknown function
	AT3G18270.1	1	CYP77A5P (cytochrome P450, family 77, subfamily A, polypeptide 5 pseudogene); catalytic		54	1	2		C	p1S(1)	26.1 misc.misc2
	AT3G18295.1	2	expressed protein		82	2	2		M	p2S(1); p1S(1)	35.2 not assigned.unknown
	AT3G18390.1	1	EMB1865 (EMBRYO DEFECTIVE 1865)		53	1	1		C	p2S(1)	33.99 development.unspecified
	AT3G18420.1	1	expressed protein contains TPR domain		338	3	7		C	p3LM(1)	26.33* misc. tetratricopeptide repeat (TPR) unknown function
	AT3G18680.1	2	aspartate/glutamate/uridylate kinase family protein		139	2	3		C	p1S(2)	23.4.3 nucleotide metabolism.phosphotransfer and pyrophosphatases.uridylate kinase
	AT3G18890.1	7	UOS1 - extensin doman and dehydrogenase domain		3257	51	87	thylakoid	C	p2T(4); p3T(1); p1S(1); p3LM(1)	20.2.5 stress.abiotic.light; 30.11 signalling.light
	AT3G19170.1	30	AtPrep1 - (AtZnMP) metalloprotease dually targeted		16642	310	469	mitochondria; plastid stroma	C	p3S(9); p1S(9); p2S(6); p2T(4); p3T(1); p3LM(1)	29.5.7 protein.degradation.metalloprotease
	AT3G19480.1	8	D-3-phosphoglycerate dehydrogenase, putative / 3-PGDH		1855	24	32	plastid stroma	C	p1S(3); p3S(2); p2S(1); p2T(1); p3LM(1)	13.1.5.1.1 amino acid metabolism.synthesis.serine-glycine-cysteine group.serine.phosphoglycerate dehydrogenase
	AT3G19900.1	1	similar to hypothetical protein [Oryza sativa (japonica cultivar-group)] (GB:BAD22944.1)		61	1	1		C	p2T(1)	35.2 not assigned.unknown
	AT3G20320.1	3	phoshatidic acid-binding protein (TGD2)		610	8	11	envelope-inner	C	p3T(2); p3LM(1)	11.1.31 lipid metabolism.FA synthesis and FA elongation.pyruvate DH
	AT3G20330.1	5	chloroplast aspartate transcarbamylase / ATCase (PYRB)		781	13	21	plastid stroma	C	p1S(3); p3S(1); p2S(1)	23.1.1.2 nucleotide metabolism.synthesis.pyrimidine.aspartate transcarbamoylase
	AT3G20390.1	16	Endoribonuclease L-PSP		3495	50	81	plastid stroma; thylakoid-peripheral-stromal-side	C	p1S(6); p3S(4); p2T(2); p3LM(2); p3T(1); p2S(1)	27.1 RNA.processing; 27.1.19 RNA.processing.ribonucleases
	AT3G20440.1	2	BE1/EMB2729 (BRANCHING ENZYME 1, EMBRYO DEFECTIVE 2729); alpha-amylase		80	2	3		C	p1S(2)	2.1.2.3 major CHO metabolism.synthesis.starch.starch branching
	AT3G20680.1	4	expressed protein NAD(P)-binding Rossmann-fold domains (SSF51735)		404	5	8		C	p3LM(2); p3T(1); p2T(1)	35.2 not assigned.unknown
	AT3G21110.1	5	PUR7 (purin 7); phosphoribosylaminoimidazolesuccinocarboxamide synthase		426	5	7	plastid stroma	C	p2S(3); p3S(1); p1S(1)	23.1.2.7 nucleotide metabolism.synthesis.purine.SAICAR synthetase
	AT3G21580.2	1	cobalt ion transporter		123	1	2		C	p3LM(1)	34 transport
	AT3G22890.1	8	ATP sulfurylase (ATPS1)		1685	21	32	plastid stroma	C	p2S(4); p3S(2); p1S(2)	14.1 S-assimilation.APS
	AT3G22960.1	10	pyruvate kinase-1 (typically homotetramer)		2320	46	74	plastid stroma	C	p1S(6); p3S(2); p2S(1); p3LM(1)	11.1.30 lipid metabolism.FA synthesis and FA elongation.pyruvate kinase
	AT3G23070.1	1	expressed protein		49	2	2		C	p1S(1)	35.2 not assigned.unknown
	AT3G23400.1	11	fibrillin (FIB4)		3028	52	84	plastoglobules; thylakoid-peripheral-stromal-side	C	p3T(2); p3S(2); p2T(2); p1S(2); p3LM(2); p2S(1)	26.31* misc. fibrillins
	AT3G23460.1	1	cyclopropane fatty acid synthase-related		37	1	1		M	p1S(1)	11.3.7 lipid metabolism.Phospholipid synthesis.cyclopropane-fatty-acyl-phospholipid synthase
	AT3G23640.1	3	HGL1 (HETEROGLYCAN GLUCOSIDASE 1); hydrolase, hydrolyzing O-glycosyl compounds		256	6	7		_	p1S(3)	2.2.2.1 major CHO metabolism.degradation.starch.starch cleavage; 26.3 misc.gluco-, galacto- and mannosidases
	AT3G23700.1	7	S1 RNA-binding/ribosomal protein		756	12	17	plastid	C	p1S(4); p2S(2); p3S(1)	35.1.14 not assigned.no ontology.S RNA-binding domain-containing protein
	AT3G23940.1	10	dihydroxyacid dehydratase		1608	25	38	plastid stroma	C	p1S(3); p2S(2); p3S(2); p2T(2); p3LM(1)	35.1 not assigned.no ontology
	AT3G24190.1	6	ABC1 kinase - ABC1K5		1280	17	25	plastid	C	p2T(2); p3S(1); p3T(1); p1S(1); p3LM(1)	26.56* misc.ABC1k family
	AT3G24430.1	5	hcf101 - 2Fe-2S assembly PSI (also NFU-1)		537	7	12	plastid stroma	C	p1S(3); p2S(1); p3S(1)	29.8 protein assembly and cofactor ligation
	AT3G24590.1	2	TPP-2 lumen		84	2	2	thylakoid-peripheral-lumenal-side	C	p2T(2)	29.9* protein. processing
	AT3G25480.1	2	rhodanese-like domain		188	3	5	thylakoid	C	p2T(2)	26.23 misc.rhodanese
	AT3G25520.1	1	60S ribosomal protein L5, similar to 60S ribosomal protein L5 GB:P49625 from (Oryza sativa)	14)	282	2	0	cytosol	M	p3LM(1)	29.2.2 protein.synthesis.misc ribososomal protein
	AT3G25660.1	2	glutamyl-tRNA amidotransferase subunit A		157	2	3		C	p3S(1); p1S(1)	19.1 tetrapyrrole synthesis.glu-tRNA synthetase
	AT3G25680.1	1	unknown protein		104	2	2		C	p3LM(1)	35.2 not assigned.unknown
	AT3G25690.1	1	CHUP1 (CHLOROPLAST UNUSUAL POSITIONING 1)		83	2	2		S	p2T(1)	35.1.41 not assigned.no ontology.hydroxyproline rich proteins
	AT3G25760.1	14	allene oxide cyclase family (ERD12-1)		3459	58	70	plastid	C	p3S(4); p2T(4); p3T(2); p1S(2); p2S(1); p3LM(1)	17.7.1.3 hormone metabolism.jasmonate.synthesis-degradation.allene oxidase synthase
	AT3G25770.1	16	allene oxide cyclase family - (ERD12-2)		5676	85	116	thylakoid-peripheral-stromal-side	C	p3S(5); p2T(3); p1S(3); p2S(2); p3T(2); p3LM(1)	17.7.1.4 hormone metabolism.jasmonate.synthesis-degradation.allene oxidase cyclase
	AT3G25860.1	14	E2 - dihydrolipoamide acetyltransferase, plastid - subunit of pyruvate dehydrogenase complex		2384	25	41	plastid	C	p3S(4); p2S(3); p1S(3); p2T(2); p3T(1); p3LM(1)	11.1.31 lipid metabolism.FA synthesis and FA elongation.pyruvate DH
	AT3G25920.1	16	50S ribosomal protein L15		3848	38	59	plastid ribosome	C	p3S(5); p1S(5); p2S(2); p3T(2); p2T(1); p3LM(1)	29.2.1.1 protein.synthesis.chloroplast/mito.plastid
	AT3G26060.1	14	Peroxiredoxin Q (Prx Q) (monomeric)		2809	43	66	plastid	C	p3S(5); p1S(3); p3T(2); p2T(2); p2S(1); p3LM(1)	21.5 redox.periredoxins
	AT3G26070.1	6	fibrillin (FIB3a)		1731	34	52	thylakoid-peripheral-stromal-side	C	p2T(4); p3T(2)	26.31* misc. fibrillins
	AT3G26080.1	1	fibrillin (FIB3b)		194	3	2	thylakoid-peripheral-stromal-side	C	p3T(1)	26.31* misc. fibrillins
	AT3G26520.1	1	tonoplast intrinsic protein, putative		189	1	2		_	p3LM(1)	34.19.2 transport.Major Intrinsic Proteins.TIP
	AT3G26570.1	4	PHt2;1 Phosphate translocator - Na+/Pi transporter		529	5	8	envelope-inner-integral	_	p3T(2); p3S(1); p3LM(1)	34.7 transport.phosphate
	AT3G26650.1	71	glyceraldehyde 3-phosphate dehydrogenase A-1 (GAPA-1)		57351	558	553	plastid stroma	C	p1S(30); p3S(13); p2S(12); p2T(6); p3T(5); p3LM(5)	1.3.4 PS.calvin cyle.GAP
	AT3G26710.1	6	expressed protein		529	6	9	thylakoid	C	p2T(4); p3T(2)	35.2 not assigned.unknown
	AT3G26740.1	1	light responsive protein-related - CCL (CCR-LIKE)		36	1	1		C	p2T(1)	30.11 signalling.light
	AT3G26900.1	4	shikimate kinase family protein		339	5	8	plastid stroma	C	p1S(2); p2S(1); p3S(1)	13.1.6.1.5 amino acid metabolism.synthesis.aromatic aa.chorismate.shikimate kinase
	AT3G27260.1	2	GTE8 (GLOBAL TRANSCRIPTION FACTOR GROUP E8); DNA binding		80	2	3		_	p1S(2)	27.3.52 RNA.regulation of transcription.Global transcription factor group
	AT3G27300.1	1	G6PD5 - glucose-6-phosphate 1-dehydrogenase		36	1	1		_	p2S(1)	7.1.1 OPP.oxidative PP.G6PD
	AT3G27740.1	3	carbamoyl phosphate synthetase small subunit		230	8	13	plastid stroma	C	p1S(2); p3S(1)	13.1.2.3.11 amino acid metabolism.synthesis.glutamate family.arginine.carbamoyl-phosphate synthase; 23.1.1.1 nucleotide metabolism.synthesis.pyrimidine.carbamoyl phosphate synthetase
	AT3G27750.1	2	similar to vacuolar sorting protein 9 (VPS9) domain-containing protein		131	2	2		C	p2S(1); p3LM(1)	35.2 not assigned.unknown
	AT3G27830.1	14	50S ribosomal protein L12-A (homologous to L12-C)	15)	3500	43	0	plastid ribosome	C	p3S(4); p2T(3); p2S(2); p3T(2); p1S(2); p3LM(1)	29.2.1.1 protein.synthesis.chloroplast/mito.plastid
	AT3G27890.1	10	NADPH-dependent FMN reductase - very abundant?		2287	27	55		M	p3S(5); p1S(3); p2S(1); p3LM(1)	35.1 not assigned.no ontology
	AT3G27925.1	14	DegP1 - HhoA homologue or DegQ		2426	43	63	thylakoid-peripheral-lumenal-side	C	p1S(4); p2S(3); p3S(2); p3T(2); p2T(2); p3LM(1)	29.5.5 protein.degradation.serine protease
	AT3G29240.1	1	expressed protein, similar to At1g33780		103	1	1		C	p3S(1)	35.1 not assigned.no ontology
	AT3G29320.1	15	starch phosphorylase-1		8240	153	248	plastid stroma	C	p1S(6); p3S(3); p2S(2); p2T(2); p3T(1); p3LM(1)	2.2.2.2 major CHO metabolism.degradation.starch.starch phosphorylase
	AT3G30645.1	1	unknown protein		42	1	1		_	p3S(1)	35.2 not assigned.unknown
	AT3G42050.1	1	vacuolar ATP synthase subunit H family protein, identical to probable vacuolar ATP synthase subunit H (EC 3.6.3.14)(V-ATPase H subunit) (Vacuolar proton pump H subunit) (Vacuolar proton pump subunit SFD) SP:Q9LX65 from (Arabidopsis thaliana); contain		53	1	1		_	p3LM(1)	34.1.1 transport.p- and v-ATPases.H+-transporting two-sector ATPase
	AT3G43520.1	11	expressed protein , glycine rich domain - thylakoid or envelope		2140	11	21	plastid	C	p3S(3); p2T(2); p1S(2); p3LM(2); p3T(1); p2S(1)	35.1.40 not assigned.no ontology.glycine rich proteins
	AT3G43540.1	7	expressed protein slr1699 - PIR:S75306		865	11	15	thylakoid	M	p3T(2); p1S(2); p3S(1); p2T(1); p3LM(1)	35.2 not assigned.unknown
	AT3G44310.1	8	nitrilase 1 (NIT1 or NITI)		815	14	19		_	p1S(4); p3S(2); p2S(1); p3LM(1)	17.2.1 hormone metabolism.auxin.synthesis-degradation
	AT3G44620.1	7	protein phosphatase- Low molecular weight phosphotyrosine		1292	19	29	plastid stroma	C	p3S(4); p1S(2); p2S(1)	29.4.5 protein.postranslational modification.phosphatase
	AT3G44880.1	1	Pheophorbide a oxygenase (PaO) or ACD1		49	1	1	envelope-inner	C	p2T(1)	19.50* tetrapyrrole degradation
	AT3G44890.1	15	50S ribosomal protein L9		3559	47	87	plastid ribosome	C	p3S(5); p1S(4); p2T(2); p3LM(2); p2S(1); p3T(1)	29.2.1.1 protein.synthesis.chloroplast/mito.plastid
	AT3G45140.1	55	lipoxygenase AtLOX2, plastid		37167	581	1283	plastid stroma	C	p1S(15); p3S(14); p2S(12); p2T(7); p3LM(4); p3T(3)	17.7.1.2 hormone metabolism.jasmonate.synthesis-degradation.lipoxygenase
	AT3G45770.1	1	oxidoreductase, zinc-binding dehydrogenase family protein		62	1	1		C	p1S(1)	35.1.12 not assigned.no ontology.pumilio/Puf RNA-binding domain-containing protei
	AT3G46100.1	1	His-tRNA synthetase (ATHRS1) / histidine--tRNA ligase (dual targeted)		104	1	1	mitochondria; plastid stroma	M	p3S(1)	29.1.21 protein.aa activation.histidine-tRNA ligase
	AT3G46630.1	6	similar to defective chloroplasts and leaves protein ( DCL-like)		475	11	16	plastid	M	p3S(4); p2S(2)	33.99 development.unspecified
	AT3G46740.1	5	OEP75 (TOC75-III) = Chloroplast import-associated channel homolog		2927	44	68	envelope-outer	C	p2T(2); p3T(1); p2S(1); p3LM(1)	29.3.3 protein.targeting.chloroplast
	AT3G46780.1	14	expressed protein (pTAC16)		6218	92	161	thylakoid	C	p2T(7); p3T(3); p1S(3); p3LM(1)	28.3* DNA.plastid nucleoid interacting
	AT3G46970.1	1	starch phosphorylase-2 (AtPHS2)		220	2	2		_	p3S(1)	2.2.2.2 major CHO metabolism.degradation.starch.starch phosphorylase
	AT3G47070.1	4	thylakoid phosphoprotein (TSP9)		1028	11	24	thylakoid-peripheral-stromal-side	_	p2T(2); p3T(1); p3LM(1)	1.1.30 PS.lightreaction.state transition
	AT3G47090.1	1	leucine-rich repeat transmembrane protein kinase, putative		38	1	1		S	p2T(1)	30.2.12 signalling.receptor kinases.leucine rich repeat XII
	AT3G47450.1	1	ATNOS1/NOS1; nitric-oxide synthase		128	1	2		M	p2S(1)	35.2 not assigned.unknown
	AT3G47470.1	27	LHCI-4 - LHCI-730		10724	115	342	thylakoid-integral	C	p2T(11); p3T(5); p3S(4); p1S(3); p2S(2); p3LM(2)	1.1.2.1 PS.lightreaction.photosystem I.LHC-I
	AT3G47520.1	27	malate dehydrogenase [NAD], plastidic		9452	122	197	plastid stroma	C	p1S(8); p2S(5); p3S(5); p2T(4); p3LM(3); p3T(2)	8.2.99 TCA / org. transformation.other organic acid transformaitons.misc
	AT3G47650.1	2	bundle-sheath defective protein 2 (bsd2) (DnaJ domain)		215	4	7	plastid stroma	C	p2S(1); p3S(1)	33.99 development.unspecified
	AT3G47850.1	1	expressed protein		43	1	2		_	p2T(1)	35.2 not assigned.unknown
	AT3G47860.1	6	apolipoprotein D-related		843	15	23	thylakoid	C	p3T(2); p2T(2); p1S(1); p3LM(1)	35.2 not assigned.unknown
	AT3G48110.1	25	Gly t-RNA synthetase (GlyRS-2) (EDD1)- EMBRYO-DEFECTIVE-DEVELOPMENT 1) (dual targeted - cTP/mTP)		5044	94	146	mitochondria; plastid stroma	C	p3S(8); p1S(6); p2S(5); p2T(4); p3T(1); p3LM(1)	29.1.14 protein.aa activation.glycine-tRNA ligase
	AT3G48420.1	12	haloacid dehalogenase-like hydrolase-2		2368	47	73	plastid stroma	C	p1S(5); p3S(3); p2S(2); p3T(1); p3LM(1)	35.1 not assigned.no ontology
	AT3G48500.1	4	expressed protein (pTAC10)		221	7	8		C	p1S(3); p2T(1)	35.2 not assigned.unknown
	AT3G48560.1	5	acetolactate synthase		555	10	16	plastid stroma	C	p1S(3); p2S(1); p3LM(1)	13.1.4.1 amino acid metabolism.synthesis.branched chain group.common
	AT3G48730.1	22	glutamate-1-semialdehyde 2,1-aminomutase 2 (GSA 2)		6144	92	65	plastid stroma	C	p2S(8); p1S(8); p3S(3); p2T(2); p3T(1)	19.3 tetrapyrrole synthesis.GSA
	AT3G48870.1	10	ClpC2 (also named HSP93-III)		11554	158	15	plastid stroma	C	p1S(3); p3S(2); p2T(2); p3LM(2); p3T(1)	29.5.5 protein.degradation.serine protease; 29.6 protein.folding
	AT3G48990.1	1	OSB-CoA ligase (menE), At4CL8		91	1	2		_	p3S(1)	11.1.8 lipid metabolism.FA synthesis and FA elongation.acyl coa ligase
	AT3G49240.1	2	EMB1796 (EMBRYO DEFECTIVE 1796);PPR motif		93	3	4		M	p1S(2)	35.1.5 not assigned.no ontology.pentatricopeptide (PPR) repeat-containing protein
	AT3G49560.1	4	similar to inner membrane translocase subunit Tim17 (maye outer p. envelope)		637	8	12	envelope	_	p2T(2); p3S(1); p3LM(1)	29.3.2 protein.targeting.mitochondria
	AT3G49680.1	6	branched-chain-amino-acid transaminase (ATBCAT-3)		837	16	20	plastid stroma	C	p1S(4); p2S(1); p3S(1)	13.1.4.1 amino acid metabolism.synthesis.branched chain group.common
	AT3G50820.1	23	psbO OEC33-like		11060	127	59	thylakoid-peripheral-lumenal-side	C	p2T(10); p3T(5); p2S(3); p3S(2); p1S(2); p3LM(1)	1.1.1.2 PS.lightreaction.photosystem II.PSII polypeptide subunits
	AT3G51140.1	11	expressed protein - Synechocystis sp., EMBL:D90903		670	11	18		C	p3S(4); p2S(2); p2T(2); p3LM(2); p3T(1)	35.2 not assigned.unknown
	AT3G51820.1	4	chlorophyll synthase		916	9	15	thylakoid	C	p3T(2); p2T(2)	19.15 tetrapyrrole synthesis.chlorophyll synthase
	AT3G51870.1	1	putative carrier protein peroxisomal Ca-dependent		64	1	2		C	p3LM(1)	34 transport
	AT3G52150.1	11	PSRP-2 associates with 30S		1451	19	32	plastid stroma; thylakoid-peripheral-stromal-side	C	p1S(5); p2S(3); p3T(1); p3S(1); p3LM(1)	29.2.1.99 protein.synthesis.chloroplast/mito.unknown
	AT3G52155.1	7	expressed protein - Phosphoglycerate mutase domain		742	9	15	plastid	C	p3S(4); p1S(3)	35.2 not assigned.unknown
	AT3G52180.1	12	protein tyrosine phosphatase, DSP4 (SEX4)		1752	32	51	plastid stroma	C	p1S(6); p2S(3); p3S(2); p3LM(1)	2.2.2.2 major CHO metabolism.degradation.starch.starch phosphorylase
	AT3G52230.1	14	OM24 orthologue		1007	15	21	envelope-outer	_	p3S(4); p2T(3); p3T(2); p1S(2); p3LM(2); p2S(1)	35.2 not assigned.unknown
	AT3G52300.1	1	ATP synthase D chain		63	1	1	mitochondria	_	p3LM(1)	9.9 mitochondrial electron transport / ATP synthesis.F1-ATPase
	AT3G52380.1	13	RNA-binding protein cp33		2607	52	81	plastid stroma	C	p1S(6); p3S(2); p2T(2); p2S(1); p3T(1); p3LM(1)	27.4 RNA.RNA binding
	AT3G52750.1	5	FtsZ2.2 plastid division - tubulin motifs		1289	12	15	plastid stroma	_	p3S(2); p2S(1); p1S(1); p3LM(1)	31.2.5 cell.division.plastid
	AT3G52930.1	4	Aldolase		212	5	6	cytosol	_	p1S(2); p2S(1); p3S(1)	4.7 glycolysis.aldolase
	AT3G52960.1	25	Peroxiredoxin IIE (PrxII E)		12746	132	258	plastid stroma	C	p1S(8); p3S(6); p2T(4); p2S(3); p3T(2); p3LM(2)	21.5 redox.periredoxins
	AT3G53130.1	4	lutein - LUT1 -cytochrome P450-type monooxygenase CYP91C1; alpha hydroxylase		473	4	7	plastid	C	p3T(1); p3S(1); p1S(1); p3LM(1)	16.1.4 secondary metabolism.isoprenoids.carotenoids
	AT3G53460.1	11	RNA binding protein CP29 A' (RNP29A')		1280	17	27	plastid stroma	C	p3S(3); p1S(3); p2S(2); p2T(2); p3LM(1)	27.4 RNA.RNA binding
	AT3G53470.1	1	expressed protein		36	1	1	thylakoid	C	p3T(1)	35.1 not assigned.no ontology
	AT3G53560.1	2	TPR protein		164	2	3	plastid	C	p2S(1); p3S(1)	35.1 not assigned.no ontology
	AT3G53580.1	12	diaminopimelate epimerase family protein		1294	23	34	plastid stroma	C	p1S(8); p3S(2); p2S(1); p3LM(1)	13.1.3.5.4 amino acid metabolism.synthesis.aspartate family.lysine.diaminopimelate epimerase
	AT3G53900.1	13	uracil phosphoribosyltransferase, putative / UMP pyrophosphorylase, putative / UPRTase,		3298	59	97	plastid stroma	C	p3S(5); p1S(5); p2S(2); p3LM(1)	23.3.1.3 nucleotide metabolism.salvage.phosphoribosyltransferases.upp
	AT3G54050.1	27	fructose-bisphosphatase (FBPA)		7420	124	222	plastid stroma	C	p1S(9); p3S(8); p2T(4); p2S(3); p3T(2); p3LM(1)	1.3.7 PS.calvin cyle.FBPase
	AT3G54210.1	5	ribosomal protein L17 family protein		233	6	7	plastid	C	p1S(2); p3S(1); p2S(1); p3LM(1)	29.2.1.1 protein.synthesis.chloroplast/mito.plastid
	AT3G54440.1	4	beta-galactosidase		171	4	6		_	p1S(4)	26.3 misc.gluco-, galacto- and mannosidases
	AT3G54640.1	7	tryptophan synthase, alpha subunit (TSA1)		1095	20	34	plastid stroma	C	p1S(4); p3S(2); p2S(1)	13.1.6.5.5 amino acid metabolism.synthesis.aromatic aa.tryptophan.tryptophan synthase
	AT3G54660.1	9	gluthatione reductase,		1119	23	34	plastid stroma	C	p1S(5); p2S(2); p3S(2)	21.2.2 redox.ascorbate and glutathione.glutathione
	AT3G54890.1	24	LHCI-1-1 - LHCI-730		5778	53	170	thylakoid-integral	C	p2T(9); p3S(5); p3T(3); p1S(3); p2S(2); p3LM(2)	1.1.2.1 PS.lightreaction.photosystem I.LHC-I
	AT3G54900.1	1	Glutaredoxin (formerly CAX-interacting protein 1; CAXIP1)		35	1	1	plastid	C	p1S(1)	21.5 redox.periredoxins
	AT3G55010.1	4	phosphoribosylformylglycinamidine cyclo-ligase, chloroplast / phosphoribosyl-aminoimidazole synthetase / AIR synthase (PUR5)		482	10	15	plastid stroma	C	p1S(3); p3S(1)	23.1.2.5 nucleotide metabolism.synthesis.purine.AIR synthase
	AT3G55040.1	8	gluthatione Transferase Lamda -2 (GSTL2) - chloroplast spinach		2458	29	48	plastid stroma	C	p1S(4); p3S(2); p2S(1); p3LM(1)	26.9 misc.glutathione S transferases
	AT3G55250.1	7	expressed protein		489	9	11	plastid	C	p2T(2); p3T(1); p3S(1); p2S(1); p1S(1); p3LM(1)	35.2 not assigned.unknown
	AT3G55330.1	8	OEC23-like-4 Tat lTP TL25.6		1625	21	39	thylakoid-peripheral-lumenal-side	C	p2T(4); p3T(2); p2S(1); p3S(1)	1.1.1.2 PS.lightreaction.photosystem II.PSII polypeptide subunits
	AT3G55400.1	6	Met-tRNA synthetase / methionine--tRNA ligase / MetRS (dual targeted)		909	20	32	mitochondria; plastid stroma	C	p1S(3); p3S(1); p2S(1); p3LM(1)	29.1.10 protein.aa activation.methionine-tRNA ligase
	AT3G55440.1	1	triosephosphate isomerase-2 (TPI-2)		367	5	11	not plastid	_	p3S(1)	4.8 glycolysis.TPI
	AT3G55760.1	5	importin doman protein		235	9	11	plastid	C	p1S(3); p3S(1); p2S(1)	35.2 not assigned.unknown
	AT3G55800.1	36	sedoheptulose-bisphosphatase (SBPase)		16372	209	552	plastid stroma	C	p3S(12); p1S(12); p2S(7); p2T(3); p3T(1); p3LM(1)	1.3.9 PS.calvin cyle.seduheptulose bisphosphatase
	AT3G56090.1	4	Ferritin-3		302	7	6	plastid stroma	C	p3S(1); p2S(1); p1S(1); p3LM(1)	15.2 metal handling.binding, chelation and storage
	AT3G56130.1	2	Biotin carboxyl carrier protein of acetyl-CoA carboxylase (BCCP)		136	2	4	plastid	C	p1S(2)	11.1.1 lipid metabolism.FA synthesis and FA elongation.Acetyl CoA Carboxylation
	AT3G56140.1	1	unknown protein (Duf399)		51	1	1		C	p3T(1)	35.2 not assigned.unknown
	AT3G56160.1	1	expressed protein		36	1	1		C	p3S(1)	35.2 not assigned.unknown
	AT3G56240.1	4	copper homeostasis factor / copper chaperone (CCH) (ATX1)		267	4	4		S	p3S(3); p2S(1)	15.2 metal handling.binding, chelation and storage
	AT3G56650.1	14	OEC23-like-1		2322	37	57	thylakoid-peripheral-lumenal-side	C	p3S(5); p1S(3); p3T(2); p2T(2); p2S(1); p3LM(1)	1.1.1.2 PS.lightreaction.photosystem II.PSII polypeptide subunits
	AT3G56690.1	2	calmodulin-binding protein		105	2	3		C	p2T(2)	30.3 signalling.calcium
	AT3G56910.1	4	PSRP-5 associates with 50S		446	4	6	plastid stroma	C	p3S(1); p2S(1); p1S(1); p3LM(1)	29.2.1.99 protein.synthesis.chloroplast/mito.unknown
	AT3G56940.1	4	CHL27 or Crd1		1652	22	38	envelope-inner-peripheral-stromal-side; thylakoid-peripheral-stromal-side	C	p2T(3); p3T(1)	19.12 tetrapyrrole synthesis.magnesium-protoporphyrin IX monomethyl ester (oxidative) cyclase
	AT3G57050.1	8	CYSTATHIONINE BETA-LYASE (CBL)		871	11	14	plastid	C	p2S(2); p3S(2); p1S(2); p3T(1); p3LM(1)	13.1.3.4.2 amino acid metabolism.synthesis.aspartate family.methionine.cystathionine beta-lyase
	AT3G57090.1	1	TPR protein		242	2	5		_	p3LM(1)	26.33* misc. tetratricopeptide repeat (TPR) unknown function
	AT3G57180.1	3	GTP binding		164	4	5		C	p1S(3)	35.2 not assigned.unknown
	AT3G57280.1	1	expressed protein		488	2	6		C	p3LM(1)	35.2 not assigned.unknown
	AT3G57330.1	1	putative / Ca2+-ATPase		72	1	1	vacuole	C	p3LM(1)	30.3 signalling.calcium
	AT3G57560.1	10	aspartate/glutamate/uridylate kinase		1412	20	29	plastid stroma	C	p1S(3); p2S(2); p2T(2); p3T(1); p3S(1); p3LM(1)	13.1.2.3.2 amino acid metabolism.synthesis.glutamate family.arginine.acetylglutamate kinase; 23.4.99 nucleotide metabolism.phosphotransfer and pyrophosphatases.misc
	AT3G57610.1	11	adenylosuccinate synthetase (ADSS)		1726	22	33	plastid stroma	C	p1S(4); p3S(2); p2S(2); p2T(2); p3T(1)	23.1.2.20 nucleotide metabolism.synthesis.purine.adenyosuccinate synthase
	AT3G58010.1	4	fibrillin FIB7a)		1106	15	27	plastoglobules; thylakoid-peripheral-stromal-side	C	p1S(2); p3T(1); p2T(1)	26.31* misc. fibrillins
	AT3G58140.1	13	Phe-tRNA synthetase (dual targeted - cTP/mTP)		2288	45	75	mitochondria; plastid stroma	C	p1S(6); p2S(3); p3S(2); p2T(1); p3LM(1)	29.1.20 protein.aa activation.phenylalanine-tRNA ligase
	AT3G58610.1	15	ketol-acid reductoisomerase		4853	70	126	plastid stroma	C	p1S(6); p2T(3); p2S(2); p3S(2); p3LM(2)	13.1.4.1 amino acid metabolism.synthesis.branched chain group.common
	AT3G59400.1	11	Porphyrin-binding protein enhances Mg-chelatase (GUN4)		1698	19	32	plastid	C	p3S(4); p1S(3); p2S(2); p2T(2)	19.4 tetrapyrrole synthesis.regulation
	AT3G59760.1	2	cysteine synthase, mitochondrial (O-acetylserine (thiol)-lyase/O-acetylserine sulfhydrylase)		117	4	2		C	p1S(1); p3LM(1)	13.1.5.3.1 amino acid metabolism.synthesis.serine-glycine-cysteine group.cysteine.OASTL
	AT3G59780.1	7	expressed protein		2937	35	59	thylakoid	_	p2T(4); p3T(2); p3S(1)	35.2 not assigned.unknown
	AT3G59840.1	1	expressed protein		108	1	1		C	p3LM(1)	35.2 not assigned.unknown
	AT3G59870.1	9	expressed protein		2383	36	50	plastid stroma	C	p3S(4); p1S(3); p2S(2)	35.2 not assigned.unknown
	AT3G59980.1	3	t-RNA binding protein		436	9	13	plastid stroma	C	p1S(2); p3S(1)	29.2.4 protein.synthesis.initiation
	AT3G60370.1	4	Isomerases		519	10	19	thylakoid-peripheral-lumenal-side	C	p2T(2); p2S(1); p3T(1)	29.6 protein.folding
	AT3G60440.1	1	related to Phosphoglycerate mutase		102	2	2		_	p3S(1)	35.2 not assigned.unknown
	AT3G60620.1	1	Plastidial CDP-Diacylglycerol Synthetase (lipid Gene database; Beisson)		48	1	1		C	p3LM(1)	11.3.3 lipid metabolism.Phospholipid synthesis.phosphatidate cytidylyltransferase
	AT3G60750.1	47	transketolase-1 (TKL-1)		52558	415	1492	plastid stroma	C	p1S(19); p3S(10); p2S(8); p2T(7); p3LM(2); p3T(1)	1.3.8 PS.calvin cyle.transketolase; 7.2.1 OPP.non-reductive PP.transketolase
	AT3G61080.1	1	ribulosamine/erythrulosamine3-kinase		65	1	1	plastid stroma	C	p3S(1)	29.4.1 protein.postranslational modification.kinase
	AT3G61440.1	1	cysteine synthase (O-acetylserine (thiol)-lyase/O-acetylserine sulfhydrylase/AtcysC1)		77	1	2		M	p3LM(1)	13.1.5.3.1 amino acid metabolism.synthesis.serine-glycine-cysteine group.cysteine.OASTL
	AT3G61470.1	19	LHCI-2.1 - LHCI-680B		5904	55	117	thylakoid-integral	C	p3S(7); p3T(4); p2T(4); p1S(3); p3LM(1)	1.1.2.1 PS.lightreaction.photosystem I.LHC-I
	AT3G61870.1	3	expressed protein		401	6	10		C	p3T(2); p2T(1)	35.2 not assigned.unknown
	AT3G62030.1	31	peptidylprolyl isomerase ROC4		17159	174	561	plastid stroma	C	p3S(10); p1S(9); p2S(4); p2T(4); p3T(2); p3LM(2)	29.6 protein.folding
	AT3G62410.1	6	CP12 domain-containing protein		449	6	8	plastid stroma	C	p2S(3); p3S(3)	1.3 PS.calvin cyle
	AT3G62530.1	10	PBS lyase HEAT-like repeat-containing protein		1234	16	24		M	p3S(4); p1S(3); p2T(2); p2S(1)	35.1 not assigned.no ontology
	AT3G63140.1	18	Rap41 or CSP41A		5803	99	171	plastid stroma	C	p1S(6); p3S(4); p2S(4); p2T(2); p3T(1); p3LM(1)	27 RNA
	AT3G63160.1	1	OEP6		85	1	2	envelope-outer-integral	_	p3T(1)	35.2 not assigned.unknown
	AT3G63170.1	14	expressed protein		2949	45	71	plastid stroma	C	p3S(5); p1S(5); p2S(3); p3LM(1)	35.2 not assigned.unknown
	AT3G63190.1	15	Putative ribosome recycling factor		4924	62	105	plastid stroma	C	p3S(5); p1S(5); p2S(2); p3T(1); p2T(1); p3LM(1)	29.2.9* protein.synthesis.ribosome recycling
	AT3G63410.1	21	vte3 - MPBQ/MSBQ methyl transferase (also APG1 or E37)		5110	59	92	envelope-inner	C	p1S(6); p2T(5); p2S(3); p3S(3); p3LM(3); p3T(1)	16.1.3.3 secondary metabolism.isoprenoids.tocopherol biosynthesis.MPBQ/MSBQ methyltransferase
	AT3G63490.1	17	50S ribosomal protein L1p family		4990	81	159	plastid ribosome	C	p1S(8); p2S(3); p3S(2); p2T(2); p3T(1); p3LM(1)	29.2.1.1 protein.synthesis.chloroplast/mito.plastid
	AT4G00290.1	1	mechanosensitive ion channel domain-containing protein		63	1	1		M	p3LM(1)	35.1 not assigned.no ontology
	AT4G00370.1	4	ANTR2 - anion transporter		377	4	7	envelope-inner-integral	C	p2S(2); p3T(1); p3LM(1)	34.18 transport.unspecified anions
	AT4G00490.1	9	beta-amylase 2 (BAM2 or BMY9)		1677	34	54	plastid stroma	C	p1S(5); p2T(2); p3S(1); p2S(1)	2.2.2.1 major CHO metabolism.degradation.starch.starch cleavage
	AT4G00620.1	1	tetrahydrofolate dehydrogenase/cyclohydrolase; Methenyltetrahydrofolate cyclohydrolase		53	1	1	plastid stroma	C	p3S(1)	25.5 C1-metabolism.Methylenetetrahydrofolate dehydrogenase & Methenyltetrahydrofolate cyclohydrolase
	AT4G00630.1	6	K+ efflux antiporter		1933	21	18	envelope	M	p2S(2); p2T(2); p3T(1); p3LM(1)	34.15 transport.potassium
	AT4G00640.1	2	expressed protein		94	2	3		_	p2S(1); p3LM(1)	35.2 not assigned.unknown
	AT4G01050.1	11	expressed protein - Rhodanese-like domain		2158	27	47	thylakoid	C	p2T(8); p3T(2); p3S(1)	26.23 misc.rhodanese
	AT4G01150.1	8	expressed protein		1156	18	40	thylakoid-integral	C	p1S(3); p2T(2); p3T(1); p3S(1); p3LM(1)	35.2 not assigned.unknown
	AT4G01310.1	17	50S ribosomal protein L5p family		3446	63	109	plastid ribosome	C	p1S(5); p3S(4); p3T(3); p2S(3); p2T(1); p3LM(1)	29.2.1.1 protein.synthesis.chloroplast/mito.plastid
	AT4G01690.1	3	protoporphyrinogen oxidase (PPO) (PPOX)		1612	20	33	plastid	M	p2T(2); p3T(1)	19.9 tetrapyrrole synthesis.protoporphyrin IX oxidase
	AT4G01800.1	15	cpSecA		5793	101	154	plastid stroma; thylakoid-peripheral-stromal-side	C	p1S(5); p2T(4); p2S(3); p3S(1); p3T(1); p3LM(1)	29.3.3 protein.targeting.chloroplast
	AT4G01883.1	5	expressed protein, cyclase/dehydrase domain		376	5	9	plastid	C	p1S(3); p2S(1); p3LM(1)	35.2 not assigned.unknown
	AT4G01900.1	8	PII nitrogen sensing protein GLB I		500	9	12	plastid stroma	C	p1S(3); p2T(2); p2S(1); p3S(1); p3LM(1)	30.1 signalling.in sugar and nutrient physiology
	AT4G02260.1	3	RSH1 (RELA-SPOT HOMOLOG); catalytic		119	3	4		C	p1S(3)	35.1 not assigned.no ontology
	AT4G02510.1	9	OEP86 (TOC159) (putative chloroplast outer envelope 86-like protein) OEP75 (TOC75)		5023	90	141	envelope-outer	_	p2T(3); p3T(2); p3LM(2); p2S(1); p3S(1)	29.3.3 protein.targeting.chloroplast
	AT4G02520.1	13	glutathione transferase Phi (ATGSTF2) - very abundant		4032	60	89	not plastid	_	p3S(5); p1S(5); p2S(2); p3LM(1)	26.9 misc.glutathione S transferases
	AT4G02530.1	12	thylakoid lumen protein TL16.5		2587	32	57	thylakoid-peripheral-lumenal-side	C	p1S(4); p3S(3); p2T(2); p3T(1); p2S(1); p3LM(1)	35.2 not assigned.unknown
	AT4G02660.1	1	WD-40 repeat family protein / beige-related		51	1	1		_	p2T(1)	35.1 not assigned.no ontology
	AT4G02725.1	3	expressed protein		301	3	6		C	p2T(2); p3T(1)	35.2 not assigned.unknown
	AT4G02770.1	14	psaD-2 subunit II - stromal side-tight		7391	67	52	thylakoid-peripheral-stromal-side	C	p3T(5); p2T(4); p3S(3); p2S(1); p3LM(1)	1.1.2.2 PS.lightreaction.photosystem I.PSI polypeptide subunits
	AT4G03200.1	5	DUF255 motif and ATP/GTP-binding site motif A (P-loop)		799	13	23	plastid	C	p1S(3); p3S(1); p2S(1)	35.2 not assigned.unknown
	AT4G03280.1	24	petC - Rieske Fe-S protein		5674	65	171	thylakoid-peripheral-lumenal-side	C	p2T(7); p3S(5); p3T(4); p1S(4); p2S(3); p3LM(1)	1.1.3 PS.lightreaction.cytochrome b6/f
	AT4G03400.1	1	DFL2 (DWARF IN LIGHT 2)		35	1	1		_	p3T(1)	33.99 development.unspecified
	AT4G03520.1	13	thioredoxin m2		1784	30	50	plastid stroma; thylakoid-peripheral-stromal-side	C	p1S(6); p2T(2); p3LM(2); p3S(1); p2S(1); p3T(1)	21.1 redox.thioredoxin
	AT4G04020.1	11	fibrillin (FIB1a)		3886	53	76	plastoglobules; thylakoid-peripheral-stromal-side	C	p1S(5); p2T(3); p3T(2); p3S(1)	26.31* misc. fibrillins
	AT4G04350.1	10	Leu-tRNA synthase (EMB2369 (EMBRYO DEFECTIVE 2369)		2093	39	63	plastid stroma	C	p1S(7); p2S(1); p3S(1); p3LM(1)	29.1.4 protein.aa activation. leucine-tRNA ligase
	AT4G04640.1	32	CF1y - atpC		7808	107	261	thylakoid-peripheral-stromal-side	C	p2T(16); p1S(7); p3T(5); p3S(2); p2S(1); p3LM(1)	1.1.4 PS.lightreaction.ATP synthase
	AT4G04770.1	5	ATNAP1 or AtABC1, LAF6 - SufB-like (ABC/ATPase) - interacts with NAP7		705	13	21	plastid	C	p1S(3); p2S(1); p3S(1)	14 S-assimilation
	AT4G04850.1	1	KEA3 (K+ efflux antiporter 3); potassium:hydrogen antiporter		71	1	2		_	p2T(1)	34.15 transport.potassium
	AT4G05090.1	2	inositol monophosphatase family protein		109	2	3		M	p3S(1); p2S(1)	23.2 nucleotide metabolism.degradation
	AT4G05180.1	19	psbQ OEC16-like Tat lTP		7464	103	255	thylakoid-peripheral-lumenal-side	C	p1S(6); p3S(5); p3T(2); p2S(2); p2T(2); p3LM(2)	1.1.1.2 PS.lightreaction.photosystem II.PSII polypeptide subunits
	AT4G08390.1	11	L-ascorbate peroxidase, stromal (sAPX)		2818	46	73	mitochondria; plastid stroma	C	p1S(5); p2S(3); p3S(2); p3LM(1)	21.2.1 redox.ascorbate and glutathione.ascorbate
	AT4G09000.1	1	14-3-3 protein GF14 chi (grf1)		93	1	2		_	p3S(1)	30.7 signalling.14-3-3 proteins
	AT4G09010.1	11	Putative Asc-perox lumen Tat ltp		3430	44	81	thylakoid-peripheral-lumenal-side	C	p2T(5); p3T(2); p1S(2); p3S(1); p3LM(1)	21.2.1 redox.ascorbate and glutathione.ascorbate
	AT4G09020.1	8	isoamylase 3 (ISA3)		1578	33	52	plastid stroma	C	p1S(3); p3T(1); p2S(1); p3S(1); p2T(1); p3LM(1)	2.1.2.4 major CHO metabolism.synthesis.starch.debranching
	AT4G09040.1	11	RNA recognition motif (RRM) protein		1655	26	43	plastid stroma	C	p1S(7); p2S(1); p3T(1); p3S(1); p3LM(1)	27.4 RNA.RNA binding
	AT4G09320.1	8	NDPK1 - very abundant		671	10	15		_	p1S(5); p3S(1); p2S(1); p3LM(1)	23.4.10 nucleotide metabolism.phosphotransfer and pyrophosphatases.nucleoside diphosphate kinase
	AT4G09350.1	1	DNAJ heat shock N-terminal domain-containing protein, similar to SP:Q45552 Chaperone protein dnaJ {Bacillus stearothermophilus}; contains Pfam profile PF00226: DnaJ domain		73	1	1		_	p3T(1)	20.2.1 stress.abiotic.heat
	AT4G09430.1	1	disease resistance protein (TIR-NBS-LRR class), putative		45	1	2		_	p2S(1)	20.1 stress.biotic
	AT4G09620.1	9	contains InterPro domain Mitochodrial transcription termination factor-related		865	9	15		C	p3S(5); p2S(1); p3T(1); p1S(1); p3LM(1)	35.2 not assigned.unknown
	AT4G09650.1	20	CF1d - atpD		9505	106	294	thylakoid-peripheral-stromal-side	C	p1S(6); p3S(4); p2T(4); p2S(2); p3T(2); p3LM(2)	1.1.4 PS.lightreaction.ATP synthase
	AT4G10000.1	1	expressed protein - Thioredoxin-like fold; (InterPro:IPR012336)		271	2	4		C	p3T(1)	35.2 not assigned.unknown
	AT4G10300.1	6	expressed protein (domains - cupin; DUF861)		801	12	20	plastid	C	p1S(3); p2S(1); p3S(1); p3LM(1)	35.2 not assigned.unknown
	AT4G10340.1	45	LHCII-5 - CP26		18470	202	506	thylakoid-integral	C	p2T(18); p3S(9); p3T(8); p1S(5); p2S(4); p3LM(1)	1.1.1.1 PS.lightreaction.photosystem II.LHC-II
	AT4G10760.1	1	EMB1706 (EMBRYO DEFECTIVE 1706); S-adenosylmethionine-dependent methyltransferase		49	1	3		_	p2T(1)	25 C1-metabolism
	AT4G11980.1	1	ATNUDT14 (Arabidopsis thaliana Nudix hydrolase homolog 14); hydrolase		49	1	1		M	p1S(1)	35.1 not assigned.no ontology
	AT4G12060.1	14	ClpT2 (formerly ClpS2)		3744	57	101	plastid stroma; thylakoid-peripheral-stromal-side	C	p1S(5); p3S(4); p2T(2); p2S(1); p3T(1); p3LM(1)	29.5.5 protein.degradation.serine protease
	AT4G12800.1	19	psaL - subunit XI (also named V)		2634	37	106	thylakoid-integral	C	p2T(8); p1S(4); p3T(3); p2S(2); p3S(1); p3LM(1)	1.1.2.2 PS.lightreaction.photosystem I.PSI polypeptide subunits
	AT4G13010.1	2	ceQORH - oxidoreductase, Zn binding dehydrogenase family		301	5	7	envelope-inner-peripheral-stromal-side	_	p3T(1); p3LM(1)	26.7 misc.oxidases - copper, flavone etc.
	AT4G13110.1	1	unknown protein (BSD domain)		39	1	1		C	p3T(1)	35.1.8 not assigned.no ontology.BSD domain-containing protein
	AT4G13200.1	3	expressed protein		1125	13	22	plastoglobules	C	p2T(2); p3T(1)	35.2 not assigned.unknown
	AT4G13430.1	5	aconitase - abundant		613	10	13		C	p1S(3); p3S(2)	8.2.3 TCA / org. transformation.other organic acid transformaitons.aconitase
	AT4G13500.1	1	expressed protein		78	2	3		C	p3T(1)	35.2 not assigned.unknown
	AT4G13550.1	3	lipase class 3 family protein		143	4	5	plastid	M	p1S(2); p3LM(1)	11.9.2.1 lipid metabolism.lipid degradation.lipases.triacylglycerol lipase
	AT4G13590.1	1	expressed protein		35	1	1		C	p3LM(1)	35.2 not assigned.unknown
	AT4G13670.1	1	DnaJ domain family		410	3	7		C	p3LM(1)	26.29* misc. DnaJ domain with unknown function
	AT4G14070.1	9	Plastidial Long-Chain Acyl-CoA Synthetase (Lipid Gene Database; Beisson)		1902	39	61	envelope	C	p2T(2); p1S(2); p3LM(2); p3T(1); p3S(1); p2S(1)	11.1.8 lipid metabolism.FA synthesis and FA elongation.acyl coa ligase
	AT4G14210.1	2	phytoene dehydrogenase precursor [phytoene desaturase] (PDS)		148	2	2		C	p2T(2)	16.1.4.2 secondary metabolism.isoprenoids.carotenoids.phytoene dehydrogenase
	AT4G14570.1	3	acylaminoacyl-peptidase (AARE1)		152	3	4		_	p1S(3)	29.5 protein.degradation
	AT4G14880.1	6	cysteine synthase / O-acetylserine (thiol)-lyase / O-acetylserine sulfhydrylase (OAS1) - very abundant		397	8	10		_	p1S(4); p3S(1); p2S(1)	13.1.5.3.1 amino acid metabolism.synthesis.serine-glycine-cysteine group.cysteine.OASTL
	AT4G14890.1	1	Fd-like-1		147	1	2		C	p2S(1)	26.3 misc. other Ferredoxins and Rieske domain
	AT4G15110.1	4	cytochrome P450-type monooxygenase CYP97B3; beta hydroxylase		273	6	9		M	p1S(4)	26.1 misc.cytochrome P450
	AT4G15510.1	5	OEC23-like-3 Tat lTP		418	14	22	thylakoid-peripheral-lumenal-side	C	p1S(2); p3T(1); p3S(1); p2S(1)	1.1.1.2 PS.lightreaction.photosystem II.PSII polypeptide subunits
	AT4G15530.1	11	pyruvate phosphate dikinase (PPDK) spluce form 1- plastid		1872	64	87	plastid stroma	_	p1S(7); p3LM(2); p3S(1); p2S(1)	4.4 glycolysis.PPFK
	AT4G15560.1	1	CLA1 (CLOROPLASTOS ALTERADOS 1)		61	1	1		C	p3LM(1)	16.1.1.1 secondary metabolism.isoprenoids.non-mevalonate pathway.DXS
	AT4G16060.1	5	expressed protein		474	8	12	plastid	_	p1S(2); p3S(1); p2S(1); p3LM(1)	35.2 not assigned.unknown
	AT4G16155.1	6	E3 - dihydrolipoamide dehydrogenase 2 (ptlpd2), plastid- subunit of pyruvate dehydrogenase complex		921	8	14	plastid	C	p1S(3); p3S(1); p2T(1); p3LM(1)	11.1.31 lipid metabolism.FA synthesis and FA elongation.pyruvate DH
	AT4G16390.1	6	RNA-binding protein P67; PPR protein		773	15	21	plastid stroma	C	p1S(4); p2S(1); p3S(1)	27.4 RNA.RNA binding
	AT4G17040.1	12	ClpR4		2083	31	48	plastid stroma; thylakoid-peripheral-stromal-side	C	p3S(5); p1S(3); p2S(2); p3T(1); p3LM(1)	29.5.5 protein.degradation.serine protease
	AT4G17300.1	6	Asp-tRNA synthetase (dual targeted)		605	14	22	mitochondria; plastid stroma	C	p1S(3); p3S(1); p2S(1); p2T(1)	29.1.22 protein.aa activation.asparagine-tRNA ligase
	AT4G17560.1	9	50S ribosomal protein L19		1906	22	23	plastid stroma	C	p3S(4); p1S(3); p3T(1); p2S(1)	29.2.1.1 protein.synthesis.chloroplast/mito.plastid
	AT4G17600.1	4	Lil3.2		330	6	9	thylakoid-integral	C	p3T(2); p2T(2)	1.1.8* light stress chlorophyll binding
	AT4G18240.1	3	starch synthase-related protein		556	8	11	plastid	C	p2T(2); p2S(1)	2.1.2.2 major CHO metabolism.synthesis.starch.starch synthase
	AT4G18370.1	3	DegP5 - HhoA homologue or DegQ		315	6	9	thylakoid-peripheral-lumenal-side	C	p3T(1); p2S(1); p3S(1)	29.5.5 protein.degradation.serine protease
	AT4G18440.1	18	adenylosuccinate lyase		2999	41	69	plastid stroma	C	p2S(8); p3S(5); p1S(3); p2T(1); p3LM(1)	23.1.2.8 nucleotide metabolism.synthesis.purine.SAICAR lyase
	AT4G18480.1	11	Mg-protoporphyrin IX chelatase- CHLI-1 (cs, ch42, non-gun phenotype)		2645	50	55	plastid stroma	C	p1S(5); p2S(3); p3S(3)	19.1 tetrapyrrole synthesis.magnesium chelatase
	AT4G18810.1	9	similar to UV-B and ozone similarly regulated protein 1 UOS1 (Pisum sativum)		1113	26	33	plastid stroma	C	p1S(3); p3S(2); p2T(2); p2S(1); p3LM(1)	20.2.99 stress.abiotic.unspecified; 30.11 signalling.light
	AT4G19100.1	3	expressed protein		146	4	5		C	p2T(2); p3T(1)	35.2 not assigned.unknown
	AT4G19170.1	12	9-cis-epoxycarotenoid dioxygenase (CCD4 also NCED4)		2293	39	56	plastoglobules	C	p2T(4); p1S(3); p3T(2); p3S(1); p2S(1); p3LM(1)	16.1.4 secondary metabolism.isoprenoids.carotenoids
	AT4G19710.2	10	aspartate kinase/homoserine dehydrogenase (ak-hsdh) model.2 has higher score than model.1		2113	26	26	plastid	C	p1S(6); p2S(2); p3S(1); p3LM(1)	13.1.3.6.1.10 amino acid metabolism.synthesis.aspartate family.misc.homoserine.bifunctional aspartate kinase/homoserine dehydrogenase
	AT4G20360.1	76	elongation factor Tu (EF-Tu-1), plastid		28624	368	714	plastid stroma	C	p1S(30); p3S(13); p2S(12); p2T(12); p3LM(6); p3T(3)	29.2.4 protein.synthesis.elongation
	AT4G20850.1	14	subtilase family protein, Tripeptidyl-peptidase (TTP2)		5331	120	189	plastid stroma	C	p1S(6); p3S(2); p2S(2); p2T(2); p3T(1); p3LM(1)	29.5.1 protein.degradation.subtilases
	AT4G20960.1	9	cytidine/deoxycytidylate deaminase, Riboflavin biosynthesis protein ribD		1054	20	27	plastid	C	p1S(5); p2S(3); p3S(1)	23.5.3 nucleotide metabolism.deoxynucleotide metabolism.cytosine deaminase
	AT4G21210.1	12	expressed protein - DUF299 domain		982	17	27	plastid stroma	C	p1S(7); p2S(3); p3S(1); p3LM(1)	35.2 not assigned.unknown
	AT4G21280.1	20	psbQ OEC16 Tat ltp		10307	101	269	thylakoid-peripheral-lumenal-side	C	p3S(5); p1S(5); p2T(4); p2S(2); p3T(2); p3LM(2)	1.1.1.2 PS.lightreaction.photosystem II.PSII polypeptide subunits
	AT4G21445.1	5	expressed protein		338	5	7	plastid stroma	C	p1S(3); p3S(1); p3LM(1)	35.2 not assigned.unknown
	AT4G21860.1	3	methionine sulfoxide reductase type B - 2 (MSRB2)		190	4	5	plastid stroma	C	p3S(1); p2S(1); p1S(1)	29.11* protein.methione sulfoxide reductases
	AT4G21990.1	1	5'-adenylylsulfate reductase-3 (APR3)		42	1	1		C	p2S(1)	14.2 S-assimilation.APR
	AT4G22240.1	6	fibrillin (FIB1b)		2097	22	30	plastoglobules; thylakoid-peripheral-stromal-side	C	p1S(3); p2T(2); p3T(1)	26.31* misc. fibrillins
	AT4G22890.1	9	expressed protein TPP/C/M		2243	29	44	thylakoid-integral	C	p3T(5); p2T(4)	35.2 not assigned.unknown
	AT4G22930.1	14	dihydroorotase, mitochondrial / DHOase (PYR4)		1457	21	31	plastid	_	p1S(6); p2S(3); p3S(3); p3T(1); p3LM(1)	23.1.1.3 nucleotide metabolism.synthesis.pyrimidine.dihydroorotase
	AT4G23100.1	9	gamma-glutamylcysteine synthetase (GSH1)		1366	24	41	plastid stroma	C	p1S(6); p2T(2); p3S(1)	21.2.2 redox.ascorbate and glutathione.glutathione
	AT4G23280.1	1	protein kinase, putative and Duf26 domain		35	1	1		S	p3LM(1)	30.2.17 signalling.receptor kinases.DUF 26
	AT4G23430.1	1	short-chain dehydrogenase/reductase family protein		94	1	1		_	p3LM(1)	26.22 misc.short chain dehydrogenase/reductase (SDR)
	AT4G23890.1	3	expressed protein Synechocystis sp., PIR:S76577		286	6	11	thylakoid	C	p2T(2); p3T(1)	35.2 not assigned.unknown
	AT4G23940.1	3	FtsH hypothetical		630	5	9		C	p3T(1); p2T(1); p3LM(1)	29.5.7 protein.degradation.metalloprotease
	AT4G24190.1	1	HSP90 or GRP94 - similar to Sheperd		39	1	1		S	p3LM(1)	29.6 protein.folding
	AT4G24280.1	17	cpHSP70-1 (DnaK homologue)		12191	179	151	plastid stroma	C	p1S(7); p2S(3); p3S(3); p2T(2); p3T(1); p3LM(1)	29.6 protein.folding
	AT4G24460.1	1	unknown protein		38	1	1		C	p3LM(1)	35.2 not assigned.unknown
	AT4G24620.1	8	glucose-6-phosphate isomerase		2485	56	86	plastid stroma	C	p1S(5); p3S(2); p2S(1)	4.3 glycolysis.G6PIsomerase
	AT4G24750.1	1	rhodanese domain protein		210	2	4		C	p3T(1)	35.2 not assigned.unknown
	AT4G24770.1	16	RNA binding protein CP31		5113	54	110	plastid stroma	C	p1S(5); p3S(4); p2S(3); p2T(2); p3T(1); p3LM(1)	27.4 RNA.RNA binding
	AT4G24810.1	2	ABC1 kinase family		175	3	3		_	p3LM(2)	26.56* misc.ABC1k family
	AT4G24830.1	16	argininosuccinate synthase		2527	26	52	plastid stroma	C	p3S(6); p1S(3); p3LM(3); p2T(2); p2S(1); p3T(1)	13.1.2.3.22 amino acid metabolism.synthesis.glutamate family.arginine.arginosuccinate synthase
	AT4G24930.1	9	thylakoid lumen 17.9 kDa protein		1340	20	32	thylakoid-peripheral-lumenal-side	C	p2T(4); p1S(3); p3T(2)	35.2 not assigned.unknown
	AT4G25050.1	18	acyl carrier protein, plastid		2066	19	36	plastid stroma	C	p1S(9); p3S(4); p2S(2); p3T(1); p2T(1); p3LM(1)	11.1.12 lipid metabolism.FA synthesis and FA elongation.ACP protein
	AT4G25080.1	6	magnesium-protoporphyrin IX methyltransferase		1360	32	52	plastid	C	p2T(3); p2S(1); p3T(1); p1S(1)	19.11 tetrapyrrole synthesis.magnesium protoporphyrin IX methyltransferase
	AT4G25100.1	8	FE-SOD -1 (FSD1)		1873	14	31	plastid stroma	_	p3S(5); p2S(1); p1S(1); p3LM(1)	21.6 redox.dismutases and catalases
	AT4G25130.1	11	methionine sulfoxide reductase type A 4 (MSRA4)		1639	25	45	plastid stroma	C	p3S(5); p1S(3); p2S(2); p3LM(1)	29.11* protein.methione sulfoxide reductases
	AT4G25370.1	9	ClpT1 (formerly ClpS1)		2430	48	81	plastid stroma; thylakoid-peripheral-stromal-side	C	p3S(4); p1S(3); p2S(1); p3LM(1)	29.5.5 protein.degradation.serine protease
	AT4G25450.1	8	ABC transporter family		1790	18	33	envelope	M	p3S(2); p2T(2); p3LM(2); p2S(1); p3T(1)	34.16 transport.ABC transporters and multidrug resistance systems
	AT4G25570.1	1	ACYB-2 (Arabidopsis cytochrome b561 -2); carbon-monoxide oxygenase		50	1	2		S	p3LM(1)	35.2 not assigned.unknown
	AT4G26300.1	5	Arg-tRNA synthetase		822	17	27	plastid stroma	_	p1S(3); p2S(1); p3S(1)	29.1.19 protein.aa activation.arginine-tRNA ligase
	AT4G26500.1	8	CpSufE or SufE1, interacts with cpNifS		942	17	27	plastid	C	p2S(3); p1S(3); p3S(1); p3LM(1)	14 S-assimilation
	AT4G26555.1	1	immunophilin / FKBP-type peptidyl-prolyl cis-trans isomerase family protein		123	1	2		C	p2T(1)	29.6 protein.folding
	AT4G26670.1	2	mitochondrial import inner membrane translocase subunit Tim17/Tim22/Tim24		292	3	5		_	p2S(1); p3T(1)	29.3.2 protein.targeting.mitochondria
	AT4G26900.1	7	imidazole glycerol phosphate synthase hisHF, chloroplast / IGP synthase / ImGPP synthase / IGPS,		1437	31	44	plastid stroma	C	p3S(3); p1S(3); p2S(1)	35.1 not assigned.no ontology
	AT4G26970.1	1	aconitate hydratase (citrate hydro-lyase/aconitase) [cytoplasmic],		132	2	1		C	p3LM(1)	8.1.3 TCA / org. transformation.TCA.aconitase
	AT4G27440.1	11	PORB - constitutive expression - main protein in barley		3337	47	65	thylakoid-peripheral-stromal-side	C	p2T(3); p1S(3); p2S(2); p3T(2); p3LM(1)	19.14 tetrapyrrole synthesis.protochlorophyllide reductase
	AT4G27520.1	1	plastocyanin-like domain-containing protein		54	1	1		S	p3LM(1)	26.19 misc.plastocyanin-like
	AT4G27700.1	2	rhodanese-like domain protein; also AtStr14		210	7	8	thylakoid	C	p3T(1); p2T(1)	26.23 misc.rhodanese
	AT4G27800.1	1	protein phosphatase 2C PPH1 / PP2C		81	1	1		M	p3T(1)	29.4.5 protein.postranslational modification.phosphatase
	AT4G27990.1	1	YGGT family protein		42	1	1		C	p3LM(1)	35.1 not assigned.no ontology
	AT4G28030.1	1	GCN5-related N-acetyltransferase (GNAT)		43	1	1		C	p1S(1)	26.24 misc.GCN5-related N-acetyltransferase
	AT4G28130.1	1	diacylglycerol kinase		37	1	1		_	p3T(1)	11.3.5 lipid metabolism.Phospholipid synthesis.diacylglycerol kinase
	AT4G28660.1	3	psbW -like sequencing project		178	3	3	thylakoid-peripheral-lumenal-side	C	p3S(1); p2T(1); p1S(1)	1.1.1.2 PS.lightreaction.photosystem II.PSII polypeptide subunits
	AT4G28706.1	7	pfkB-type carbohydrate kinase family protein		665	13	18	plastid stroma	C	p1S(5); p2S(1); p3S(1)	3.5 minor CHO metabolism.others
	AT4G28730.1	2	glutaredoxin family protein - likely plastid		102	3	3		C	p2S(1); p3LM(1)	21.4 redox.glutaredoxins
	AT4G28740.1	2	similar to LPA1 (LOW PSII ACCUMULATION1)		266	2	4		_	p2T(2)	35.2 not assigned.unknown
	AT4G28750.1	12	psaE-1 subunit IV - stromal side		3876	31	34	thylakoid-peripheral-stromal-side	C	p3S(4); p2T(4); p3T(2); p2S(2)	1.1.2.2 PS.lightreaction.photosystem I.PSI polypeptide subunits
	AT4G29060.1	23	PSRP-7 - homologue of C. reinhardtii PETS		10864	192	334	plastid stroma	C	p1S(11); p2S(5); p3S(3); p2T(2); p3T(1); p3LM(1)	29.2.1.99 protein.synthesis.chloroplast/mito.unknown
	AT4G29350.1	1	profilin 2 - actin monomer binding protein		78	1	1		_	p1S(1)	31.6* cell organization-cytoskeleton/myosin/actin/tubulin/movement
	AT4G29590.1	3	methyltransferase domain protein		232	4	6	plastid	C	p1S(2); p2S(1)	29.4 protein.postranslational modification
	AT4G29670.1	5	thioredoxin family protein		384	6	10	plastid stroma	C	p1S(4); p2S(1)	21.1 redox.thioredoxin
	AT4G29840.1	8	threonine synthase, chloroplast - MTO2 (METHIONINE OVER-ACCUMULATOR)		987	17	27	plastid stroma	C	p1S(6); p3S(2)	13.1.3.2.1 amino acid metabolism.synthesis.aspartate family.threonine.threonine synthase
	AT4G30310.1	1	ribitol kinase, putative, similar to ribitol kinase (Klebsiella pneumoniae) gi:2905643:gb:AAC26495		102	1	2		_	p3S(1)	3.3 minor CHO metabolism.sugar alcohols
	AT4G30580.1	1	LPAAT (ACT2) = plastidial lysophosphatidic/ 1-acylglycerol-Phosphate Acyltransferase		131	3	5	envelope-inner-integral	C	p3LM(1)	11.1 lipid metabolism.glycolipid synthesis
	AT4G30620.1	5	expressed protein hypothetical protein - Arabidopsis thaliana,PID:g3738329		747	10	16		C	p1S(4); p3S(1)	35.2 not assigned.unknown
	AT4G30690.1	1	translation initiation factor 3 (IF-3) family protein		52	1	2	plastid stroma	C	p1S(1)	29.2.3 protein.synthesis.initiation
	AT4G30720.1	8	expressed protein - domain Pyridine nucleotide-disulphide oxidoreductase (homologue Synechocystis sp.PIR2:S76076 )		712	13	18	plastid stroma	C	p1S(3); p3S(2); p3T(1); p2T(1); p3LM(1)	35.2 not assigned.unknown
	AT4G30920.1	12	leucyl aminopeptidase (LAP2)		2249	41	65	plastid	C	p1S(9); p3S(3)	29.5 protein.degradation
	AT4G30950.1	4	FD6C = omega-6 fatty acid desaturase 'chloroplast omega-6 fatty acid desaturase (fad6)		239	4	5	envelope-inner-integral	C	p2S(2); p2T(2)	11.2.4 lipid metabolism.FA desaturation.omega 6 desaturase
	AT4G31390.1	3	ABC1 kinase - ABC1K3		1396	31	46	plastoglobules	C	p2T(2); p3T(1)	26.56* misc.ABC1k family
	AT4G31530.1	6	expressed protein - dehydrogenase domain		1131	10	16	plastid stroma	C	p2T(2); p1S(2); p3S(1); p3LM(1)	35.2 not assigned.unknown
	AT4G31990.1	18	aspartate aminotransferase, chloroplast (transaminase A/AAT1/Asp5		9090	135	227	plastid stroma	C	p1S(8); p2S(3); p3S(2); p2T(2); p3LM(2); p3T(1)	13.1.1.2.1 amino acid metabolism.synthesis.central amino acid metabolism.aspartate.aspartate aminotransferase
	AT4G32250.1	2	protein kinase family protein		200	4	6		_	p2S(1); p3LM(1)	29.4.1 protein.postranslational modification.kinase
	AT4G32260.1	6	CFO-II - atpG		2590	26	57	thylakoid-integral	C	p2T(4); p3T(2)	1.1.4 PS.lightreaction.ATP synthase
	AT4G32400.1	2	carrier protein		164	2	3		_	p3LM(2)	2.1.2.5 major CHO metabolism.synthesis.starch.transporter
	AT4G32520.1	1	glycine/serine hydroxymethyltransferase		45	1	1		C	p3S(1)	1.2.5 PS.photorespiration.serine hydroxymethyltransferase; 13.1.5.2.1 amino acid metabolism.synthesis.serine-glycine-cysteine group.glycine.glycine hydroxymethyltransferase
	AT4G32770.1	2	tocopherol cyclase (vte1)		263	2	3	plastoglobules	C	p3T(1); p2T(1)	16.1.3.4 secondary metabolism.isoprenoids.tocopherol biosynthesis.tocopherol cyclase
	AT4G33010.1	3	glycine decarboxylase/glycine cleavage system P-protein		280	7	4	mitochondria	M	p3LM(2); p3S(1)	13.2.5.2 amino acid metabolism.degradation.serine-glycine-cysteine group.glycine
	AT4G33350.1	5	Tic22		404	8	12	envelope-intermembranespace	C	p2T(2); p2S(1); p3T(1); p3LM(1)	29.3.3 protein.targeting.chloroplast
	AT4G33470.1	1	HDA14 (histone deacetylase 14); histone deacetylase		39	1	1		C	p1S(1)	27.3.55 RNA.regulation of transcription.HDA
	AT4G33500.1	8	protein phosphatase 2C-related / PP2C-related		590	12	16	plastid	C	p2T(3); p1S(3); p3S(1); p2S(1)	29.4.5 protein.postranslational modification.phosphatase
	AT4G33510.1	7	2-dehydro-3-deoxyphosphoheptonate aldolase 2 / 3-deoxy-D-arabino-heptulosonate 7-phosphate synthase 2 / DAHP synthetase 2 (DHS2),		800	9	17		C	p3S(4); p3T(1); p2S(1); p3LM(1)	13.1.6.1.1 amino acid metabolism.synthesis.aromatic aa.chorismate.3-deoxy-D-arabino-heptulosonate 7-phosphate synthase
	AT4G33520.2	5	PAA1 - copper transport envelope		323	5	7	envelope-inner	C	p1S(2); p3S(1); p2S(1); p3LM(1)	34.12 transport.metal
	AT4G33580.1	2	beta carbonate dehydratase 5 (CA5) (low expression in leaf)		142	2	3		C	p1S(2)	8.3 TCA / org. transformation.carbonic anhydrases
	AT4G33680.1	18	aminotransferase, classes I and II - AGD2 (ABERRANT GROWTH AND DEATH 2)		3250	54	84	plastid stroma	C	p1S(9); p2S(5); p2T(2); p3S(1); p3LM(1)	13.1.3.5.3 amino acid metabolism.synthesis.aspartate family.lysine.LL-diaminopimelic acid aminotransferase
	AT4G33760.1	15	tRNA synthetase class II (D, K and N) protein (dual targeted - cTP/mTP)		2229	35	51	mitochondria; plastid stroma	C	p1S(9); p3S(3); p2S(2); p3LM(1)	29.1.12 protein.aa activation.aspartate-tRNA ligase
	AT4G34020.2	1	DJ-1 protease		38	1	1		C	p3T(1)	29 protease
	AT4G34090.1	13	expressed protein		1717	26	39	plastid stroma	C	p1S(8); p3S(2); p2S(1); p3T(1); p2T(1)	35.2 not assigned.unknown
	AT4G34120.1	7	CBS domain-containing protein - LEJ1 (LOSS OF THE TIMING OF ET AND JA BIOSYNTHESIS 1)		1680	23	40	plastid stroma	C	p3S(4); p2S(2); p1S(1)	35.1 not assigned.no ontology
	AT4G34200.1	20	D-3-phosphoglycerate dehydrogenase (3-PGDH) - EDA9 (embryo sac development arrest 9) -very abundant		4496	62	92	plastid	C	p1S(10); p2S(3); p3S(3); p2T(2); p3T(1); p3LM(1)	13.1.5.1.1 amino acid metabolism.synthesis.serine-glycine-cysteine group.serine.phosphoglycerate dehydrogenase
	AT4G34240.1	2	aldehyde dehydrogenase (ALDH3); 3-chloroallyl aldehyde dehydrogenase		165	2	2		_	p2T(2)	5.1 fermentation.aldehyde dehydrogenase
	AT4G34450.1	4	Adaptin motif - putative coatomer gamma-2 subunit/ gamma-2 coat protein -		284	4	6	not plastid	_	p1S(3); p3LM(1)	31.4 cell. vesicle transport
	AT4G34620.1	6	30S ribosomal protein S16p family		855	10	16		M	p3S(3); p2T(2); p3LM(1)	29.2.2 protein.synthesis.misc ribososomal protein
	AT4G34730.1	4	ribosome-binding factor A family protein		475	6	9	plastid stroma	C	p2S(1); p3S(1); p2T(1); p1S(1)	29.2.7* protein.synthesis.ribosome biogenesis
	AT4G34740.1	5	ATASE2/ATD2 (GLN PHOSPHORIBOSYL PYROPHOSPHATE AMIDOTRANSFERASE 2)		345	6	7	plastid	C	p1S(3); p3S(2)	23.1.2.1 nucleotide metabolism.synthesis.purine.amidophosphoribosyltransferase
	AT4G34820.1	5	expressed protein		494	10	14	plastid	_	p2T(2); p1S(2); p3LM(1)	35.2 not assigned.unknown
	AT4G34830.1	2	pentatricopeptide repeat (PPR) protein		156	3	4	plastid	C	p2T(1); p3LM(1)	35.1.5 not assigned.no ontology.pentatricopeptide (PPR) repeat-containing protein
	AT4G35000.1	1	ascorbate peroxidase (APX3)		93	2	3	peroxisome	_	p3LM(1)	21.2.1 redox.ascorbate and glutathione.ascorbate
	AT4G35250.1	10	vestitone reductase-related		2769	39	72	thylakoid	C	p2T(4); p1S(3); p3T(2); p3LM(1)	35.1 not assigned.no ontology
	AT4G35630.1	12	phosphoserine aminotransferase - abundant		1136	18	27		C	p1S(5); p2S(3); p3S(2); p2T(1); p3LM(1)	13.1.5.1.2 amino acid metabolism.synthesis.serine-glycine-cysteine group.serine.phosphoserine aminotransferase
	AT4G35760.1	1	electron carrier/ protein disulfide oxidoreductase		167	2	4		C	p3T(1)	35.2 not assigned.unknown
	AT4G35860.1	1	Ras-related GTP-binding protein, putative		89	2	2		_	p3LM(1)	30.5 signalling.G-proteins
	AT4G36530.1	1	hydrolase, alpha/beta fold family protein		67	1	1		_	p3T(1)	35.1 not assigned.no ontology
	AT4G36810.1	9	geranylgeranyl pyrophosphate synthase (GGPS1) / GGPP synthetase / farnesyltranstransferase		847	16	22	plastid stroma	C	p1S(4); p3S(2); p3T(1); p2S(1); p3LM(1)	16.1.1.10 secondary metabolism.isoprenoids.mevalonate pathway.geranylgeranyl pyrophosphate synthase
	AT4G36910.1	5	CBS domain-containing protein - LEJ2 (LOSS OF THE TIMING OF ET AND JA BIOSYNTHESIS 2)		923	6	9	plastid stroma	C	p3S(3); p2S(1); p1S(1)	35.1 not assigned.no ontology
	AT4G37000.1	12	red chlorophyll catabolite reductase (RCCR) - also accelerated cell death 2 (ACD2)		3330	58	101	mitochondria; plastid stroma	C	p1S(5); p3T(2); p2S(2); p3S(1); p2T(1); p3LM(1)	19.50* tetrapyrrole degradation
	AT4G37040.1	1	methionine aminopeptidase - MAP1D		52	1	1	mitochondria; plastid	M	p2S(1)	29.5.7 protein.degradation.metalloprotease
	AT4G37200.1	1	HCF164 Fd like		251	2	4	thylakoid-peripheral-stromal-side	C	p3T(1)	29.8 protein assembly and cofactor ligation
	AT4G37270.1	5	Cu-ATPase, HMA1		903	10	15	envelope	M	p2T(2); p3LM(2); p3S(1)	34.12 transport.metal
	AT4G37925.1	1	NDH M		285	5	6	thylakoid	M	p2T(1)	1.1.6 PS.lightreaction.NADH DH
	AT4G38200.1	1	unknown protein - Sec7 domain		37	1	1		_	p2T(1)	35.1 not assigned.no ontology
	AT4G38225.1	5	expressed protein		381	8	11		C	p1S(5)	35.2 not assigned.unknown
	AT4G38380.1	1	MATE efflux protein-related		101	1	1		C	p3LM(1)	34.16 transport.ABC transporters and multidrug resistance systems
	AT4G38460.1	7	geranylgeranyl pyrophosphate synthase, putative / GGPP synthetase, putative / farnesyltranstransferase		1092	15	26	plastid stroma	C	p1S(5); p2S(1); p3S(1)	16.1.1.10 secondary metabolism.isoprenoids.mevalonate pathway.geranylgeranyl pyrophosphate synthase
	AT4G38970.1	60	fructose-bisphosphate aldolase-2 (SFBA-2)		26789	318	641	plastid stroma; plastoglobules	C	p1S(22); p3S(13); p2S(8); p2T(7); p3T(6); p3LM(4)	1.3.6 PS.calvin cyle.aldolase
	AT4G38990.1	2	glycosyl hydrolase family 9 protein		90	2	3		S	p3T(2)	10.6.1 cell wall.degradation.cellulases and beta -1,4-glucanases
	AT4G39040.1	1	RNA binding protein - CRS1/YhbY domain		174	1	2	plastid stroma	C	p3S(1)	27.4 RNA.RNA binding
	AT4G39080.1	1	vacuolar proton ATPase, putative, similar to Swiss-Prot:Q93050 vacuolar proton translocating ATPase 116 kDa subunit A isoform 1 (Clathrin-coated vesicle/synaptic vesicle proton pump 116 kDa subunit, Vacuolar proton pump subunit 1, Vacuolar adenosine		377	4	7		_	p3LM(1)	34.1 transport.p- and v-ATPases
	AT4G39120.1	6	Inositol monophosphatase-2		633	11	17	plastid	C	p1S(5); p3S(1)	3.4.5 minor CHO metabolism.myo-inositol.inositol phosphatase
	AT4G39460.1	5	S-Adenosylmethionine transporter (SAMT1)		1233	10	23	envelope	C	p3S(2); p3LM(2); p3T(1)	34.8 transport.metabolite transporters at the envelope membrane
	AT4G39710.1	3	Isomerases		598	7	13	thylakoid-peripheral-lumenal-side	C	p2T(2); p3T(1)	29.6 protein.folding
	AT4G39960.1	8	DnaJ domain family		807	12	14	thylakoid	M	p1S(3); p2S(2); p2T(2); p3T(1)	26.29* misc. DnaJ domain with unknown function
	AT4G39970.1	8	haloacid dehalogenase-like hydrolase-3		1153	19	33	plastid stroma	C	p1S(4); p3S(2); p2S(1); p3LM(1)	3.5 minor CHO metabolism.others
	AT5G01220.1	2	UDP-sulfoquinovose:DAG sulfoquinovosyltransferase (sulfolipid synthase) (SQD2)		178	3	4		C	p2T(1); p3LM(1)	11.10.4 lipid metabolism.glycolipid synthesis.sulfolipid synthase
	AT5G01500.1	3	mitochondrial carrier protein family		338	5	5		C	p3T(1); p2S(1); p3LM(1)	34.9 transport.metabolite transporters at the mitochondrial membrane
	AT5G01530.1	28	LHCII-4.1-CP29		10221	95	235	thylakoid-integral	C	p2T(13); p3T(8); p1S(4); p3S(1); p2S(1); p3LM(1)	1.1.1.1 PS.lightreaction.photosystem II.LHC-II
	AT5G01590.1	1	expressed protein		53	2	2		C	p3LM(1)	35.2 not assigned.unknown
	AT5G01600.1	10	Ferritin-1		1306	21	29	plastid stroma	C	p3S(5); p1S(3); p2S(1); p3LM(1)	15.2 metal handling.binding, chelation and storage
	AT5G01650.1	8	macrophage migration inhibitory factor family protein / MIF family protein		932	9	16		_	p1S(5); p2S(1); p3S(1); p3LM(1)	35.1 not assigned.no ontology
	AT5G01920.1	4	Stt7-Att2 kinase state transition thylakoid		470	4	7	thylakoid-integral	C	p2T(4)	1.1.30 PS.lightreaction.state transition
	AT5G01950.1	2	ATP binding / kinase/ protein serine/threonine kinase		74	2	2		S	p2S(1); p2T(1)	30.2.8.1 signalling.receptor kinases.leucine rich repeat VIII-1
	AT5G02120.1	1	Ohp1 or Lil2/Hlip/Scp		89	1	2	thylakoid-integral	C	p3T(1)	1.1.8* light stress chlorophyll binding
	AT5G02250.1	2	3'-5' exoribonuclease - RNR1 (this is not RIF10)		91	2	2	plastid	C	p1S(1); p3LM(1)	27.1.19 RNA.processing.ribonucleases
	AT5G02370.1	2	kinesin motor protein-related		77	2	3		C	p2T(2)	31.1 cell.organisation
	AT5G02500.1	6	HSP70-1 (HSC70-1) (not plastid) - very abundant		1003	20	19	cytosol	_	p1S(3); p3S(1); p2S(1); p3LM(1)	29.6 protein.folding
	AT5G02940.1	9	expressed protein		2963	54	83	envelope	M	p2S(3); p2T(2); p3LM(2); p3T(1); p1S(1)	35.2 not assigned.unknown
	AT5G03390.1	1	expressed protein		46	1	1		M	p2T(1)	35.2 not assigned.unknown
	AT5G03455.1	1	rhodanese-like domain-containing protein (cdc25)		39	1	2		M	p2T(1)	26.23 misc.rhodanese
	AT5G03650.1	7	starch branching enzyme class II (SBEII)		1368	27	36	plastid stroma	_	p1S(3); p2T(2); p3S(1); p3LM(1)	2.1.2.3 major CHO metabolism.synthesis.starch.starch branching
	AT5G03880.1	3	glutaredoxin		943	11	19	thylakoid	C	p2T(2); p3T(1)	35.2 not assigned.unknown
	AT5G03910.1	1	ABC transporter family protein		77	2	3		C	p2S(1)	34.16 transport.ABC transporters and multidrug resistance systems
	AT5G03940.1	11	cpSRP54		1095	19	28	plastid stroma	C	p1S(4); p2T(3); p2S(2); p3S(1); p3LM(1)	29.3.3 protein.targeting.chloroplast
	AT5G04140.1	39	ferredoxin-dependent glutamate synthase/glu1/Fd-GOGAT 1		50534	691	1469	plastid stroma	C	p3S(11); p1S(11); p2S(10); p2T(4); p3T(2); p3LM(1)	12.2.1 N-metabolism.ammonia metabolism.glutamate synthase
	AT5G04360.1	6	pullulanase (PUL1) or limit dextrinase 1 (LDA1)		1248	29	39	plastid	C	p1S(5); p3S(1)	2.1.2.4 major CHO metabolism.synthesis.starch.debranching
	AT5G04440.1	4	expressed protein		170	4	4		C	p3S(3); p1S(1)	35.2 not assigned.unknown
	AT5G04490.1	1	Phytol kinase or VTE5		74	1	2	plastid	C	p3LM(1)	19.50* tetrapyrrole degradation
	AT5G04590.1	17	sulphite reductase		3988	64	118	plastid stroma	C	p3S(6); p1S(4); p2S(3); p2T(2); p3T(1); p3LM(1)	14.3 S-assimilation.sulfite redox
	AT5G04740.1	9	ACT domain-containing protein		836	20	29	plastid stroma	C	p1S(5); p3S(2); p2S(1); p3LM(1)	13 amino acid metabolism
	AT5G04810.1	1	pentatricopeptide repeat (PPR) protein - maize PPR4 orthologue		36	1	1		C	p1S(1)	26.54* misc. Pentapeptide repeat (PPR) unknown function
	AT5G04900.1	1	short-chain dehydrogenase/reductase (SDR) family protein		49	1	1		C	p3T(1)	26.22 misc.short chain dehydrogenase/reductase (SDR)
	AT5G05000.1	1	Toc34, component of the import apparatus, GTP binding domain		42	1	1	envelope-outer-integral	_	p3T(1)	29.3.3 protein.targeting.chloroplast
	AT5G05200.1	2	ABC1 kinase - AB1K4 (DUF772; MecA_N)		77	2	2	plastoglobules	M	p2T(2)	26.56* misc.ABC1k family
	AT5G05730.1	3	ASA1 (ANTHRANILATE SYNTHASE ALPHA SUBUNIT 1); anthranilate synthase		268	5	7		C	p1S(2); p3S(1)	13.1.6.5.1 amino acid metabolism.synthesis.aromatic aa.tryptophan.anthranilate synthase
	AT5G05740.1	3	EGY2, metalloprotease		348	4	7	thylakoid	C	p2T(2); p3T(1)	29.5.7 protein.degradation.metalloprotease
	AT5G06290.1	26	2-Cys Peroxiredoxin B (Prx B)		13198	165	83	plastid stroma	C	p1S(11); p3S(8); p2S(3); p3T(2); p3LM(2)	21.5 redox.periredoxins
	AT5G07020.1	6	proline-rich protein family		724	9	12	thylakoid	_	p3T(4); p2T(1); p1S(1)	35.1.42 not assigned.no ontology.proline rich family
	AT5G08050.1	3	expressed protein		391	6	15	thylakoid	C	p2T(2); p3T(1)	35.2 not assigned.unknown
	AT5G08280.1	22	hydroxymethylbilane synthase (HEMC)		5601	95	168	plastid stroma	C	p1S(8); p2S(6); p3S(3); p3T(2); p2T(2); p3LM(1)	19.5 tetrapyrrole synthesis.porphobilinogen deaminase
	AT5G08410.1	8	ferredoxin-thioredoxin reductase (FTRAv2)		638	14	18	plastid stroma	C	p3S(3); p1S(3); p2S(2)	21.1 redox.thioredoxin
	AT5G08540.1	4	expressed protein - maybe RNA binding?		758	15	22	envelope	C	p3S(1); p3T(1); p2S(1); p3LM(1)	35.2 not assigned.unknown
	AT5G08610.1	2	DEAD box RNA helicase (RH26)		142	2	4		C	p3S(1); p3LM(1)	27.5* RNA. DEAD/DEAH BOX helicase
	AT5G08650.1	9	Elongation factor Tu with GTP-binding domain LepA, putative		920	16	25	plastid stroma	C	p1S(3); p3S(2); p3T(1); p2S(1); p2T(1); p3LM(1)	29.2.4 protein.synthesis.elongation
	AT5G08670.1	4	H+-transporting ATP synthase beta chain	16)	1576	12	0	mitochondria	M	p2T(2); p3T(1); p3LM(1)	9.9 mitochondrial electron transport / ATP synthesis.F1-ATPase
	AT5G08740.1	3	pyridine nucleotide-disulphide oxidoreductase (DhnA like)		788	10	18	plastoglobules	C	p2T(2); p3T(1)	9.2.3 mitochondrial electron transport / ATP synthesis.NADH-DH.type II.mitochondrial
	AT5G09650.1	16	Inorganic phosphatase like		2871	58	96	plastid stroma; thylakoid-peripheral-stromal-side	C	p1S(5); p3S(4); p2S(3); p3T(2); p2T(1); p3LM(1)	23.4.99 nucleotide metabolism.phosphotransfer and pyrophosphatases.misc
	AT5G09660.1	9	malate dehydrogenase, glyoxysomal/peroxisomal (PMDH2) - very abundant		2639	33	56	not plastid	_	p1S(4); p2T(2); p3S(1); p3T(1); p3LM(1)	6.3 gluconeogenesis.Malate DH
	AT5G09820.1	3	fibrillin (FIB5)		129	3	3	plastoglobules	C	p3S(2); p1S(1)	26.31* misc. fibrillins
	AT5G10160.1	5	beta-hydroxyacyl-ACP dehydratase, plastid (Lipid Gene Database; Beisson)		987	18	17		C	p2T(2); p2S(1); p3T(1); p1S(1)	11.1.5 lipid metabolism.FA synthesis and FA elongation.beta hydroxyacyl ACP dehydratase
	AT5G10460.1	1	haloacid dehalogenase-like hydrolase		39	1	1		_	p3S(1)	35.1 not assigned.no ontology
	AT5G10490.1	1	Mechanosensitive ion channel MSL2		55	1	1	envelope	C	p3LM(1)	31.2.5 cell.division.plastid
	AT5G10920.1	2	argininosuccinate lyase (AtArgH)		142	3	4		C	p3S(1); p3LM(1)	13.1.2.3.23 amino acid metabolism.synthesis.glutamate family.arginine.argininosuccinate lyase
	AT5G11450.1	5	OEC23-like-6 Tat lTP TP21.5		488	8	13	thylakoid-peripheral-lumenal-side	C	p2T(2); p1S(2); p3T(1)	1.1.1.2 PS.lightreaction.photosystem II.PSII polypeptide subunits
	AT5G11670.1	4	NADP dependent malic enzyme 2 (ATNADP-ME2) - very abundant		311	7	12	not plastid	_	p1S(3); p3S(1)	8.2.10 TCA / org. transformation.other organic acid transformaitons.malic
	AT5G11880.1	13	diaminopimelate decarboxylase, putative / DAP carboxylase		893	21	29	plastid	C	p1S(11); p3S(1); p3LM(1)	13.1.3.5.5 amino acid metabolism.synthesis.aspartate family.lysine.diaminopimelate decarboxylase
	AT5G12040.1	10	carbon-nitrogen hydrolase family protein, similar to Nit protein 2		1616	22	34	plastid stroma	C	p1S(6); p3S(2); p2S(1); p3LM(1)	35.1 not assigned.no ontology
	AT5G12470.1	11	expressed protein		3183	44	81	envelope	C	p2T(3); p3T(2); p1S(2); p3LM(2); p2S(1); p3S(1)	35.2 not assigned.unknown
	AT5G12860.1	13	IEP45 = 2-oxoglutarate/malate translocator		1176	22	34	envelope-inner-integral	C	p2S(3); p3S(2); p3T(2); p2T(2); p1S(2); p3LM(2)	34.8 transport.metabolite transporters at the envelope membrane
	AT5G13030.1	6	expressed protein		1194	28	42	plastid stroma	C	p1S(3); p3S(1); p2S(1); p3LM(1)	35.2 not assigned.unknown
	AT5G13120.1	13	peptidyl-prolyl isomerase protein - TLP21		2727	38	64	thylakoid-peripheral-lumenal-side	C	p3S(4); p2T(4); p3T(2); p1S(2); p2S(1)	29.6 protein.folding
	AT5G13410.1	8	Isomerases TAT lTP		1198	21	34	thylakoid-peripheral-lumenal-side	C	p2T(2); p1S(2); p2S(1); p3S(1); p3T(1); p3LM(1)	29.6 protein.folding
	AT5G13420.1	3	transaldolase-1 - very abundant		160	3	3		C	p1S(2); p3S(1)	7.2.2 OPP.non-reductive PP.transaldolase
	AT5G13450.1	1	ATP synthase delta chain, mitochondrial		119	2	3	mitochondria	M	p3LM(1)	9.9 mitochondrial electron transport / ATP synthesis.F1-ATPase
	AT5G13510.1	13	50S ribosomal protein L10		7459	91	176	plastid ribosome	C	p3S(4); p1S(3); p2S(2); p2T(2); p3LM(2)	29.2.1.1 protein.synthesis.chloroplast/mito.plastid
	AT5G13630.1	16	Mg-protoporphyrin IX chelatase (CHLH) (GUN5) - also ABA receptor (17051210)		5741	121	192	plastid	C	p1S(6); p2S(4); p3S(2); p2T(2); p3T(1); p3LM(1)	19.1 tetrapyrrole synthesis.magnesium chelatase
	AT5G13650.1	14	elongation factor protein, typeA/bipA like		3483	46	79	plastid stroma	C	p3S(6); p1S(6); p2S(1); p3LM(1)	29.2.4 protein.synthesis.elongation
	AT5G13720.1	1	ribonuclease domain		142	3	5		C	p3LM(1)	35.2 not assigned.unknown
	AT5G14080.1	2	pentatricopeptide repeat (PPR) protein		87	2	2		M	p3T(1); p2T(1)	26.54* misc. Pentapeptide repeat (PPR) unknown function
	AT5G14100.1	1	ATNAP14 (Non-intrinsic ABC protein 14)		83	1	2		C	p3LM(1)	34.16 transport.ABC transporters and multidrug resistance systems
	AT5G14200.1	8	3-isopropylmalate dehydrogenase-2, chloroplast		2614	33	13	plastid stroma	_	p1S(3); p2S(2); p2T(2); p3S(1)	13.1.4.4.3 amino acid metabolism.synthesis.branched chain group.leucine specific.3-isopropylmalate dehydrogenase
	AT5G14220.1	3	protoporphyrinogen oxidase (PPO) (PPOX)		230	4	6		_	p3T(1); p3S(1); p3LM(1)	19.9 tetrapyrrole synthesis.protoporphyrin IX oxidase
	AT5G14260.1	6	SET domain-containing protein, low similarity to ribulose-1,5-bisphosphate carboxylase/oxygenase small subunit N-methyltransferase I		937	17	25	plastid	C	p3S(3); p1S(3)	27.3.69 RNA.regulation of transcription.SET-domain transcriptional regulator family
	AT5G14320.1	8	30S ribosomal protein S13		727	17	25	plastid ribosome	C	p1S(5); p3S(1); p2S(1); p3LM(1)	29.2.1.1 protein.synthesis.chloroplast/mito.plastid
	AT5G14590.1	8	isocitrate dehydrogenase [NAD+],		855	13	18		C	p1S(4); p3T(1); p3S(1); p2S(1); p3LM(1)	8.1.4 TCA / org. transformation.TCA.IDH
	AT5G14660.1	7	peptide deformylase 1B (PDF1B)		856	13	22	mitochondria; plastid stroma	C	p1S(4); p3S(1); p2S(1); p3LM(1)	29.4 protein.postranslational modification
	AT5G14740.1	4	beta carbonic anhydrase 2 (CA2) - gene model with cTP		4574	39	5	plastid stroma	_	p3S(2); p1S(2)	8.3 TCA / org. transformation.carbonic anhydrases
	AT5G14910.1	12	expressed protein - heavy metal binding domain - also in CN-PAGE -stroma		1427	15	30	plastid stroma	C	p1S(6); p2T(2); p2S(1); p3S(1); p3T(1); p3LM(1)	15.2 metal handling.binding, chelation and storage
	AT5G15090.1	1	porin - voltage-dependent anion-selective channel protein hsr2		52	1	1		_	p3LM(1)	34.18 transport.unspecified anions
	AT5G15190.1	1	unknown protein		37	1	1		_	p3LM(1)	35.2 not assigned.unknown
	AT5G15200.1	1	40S ribosomal protein S9 (RPS9B)		38	1	1	cytosol	_	p3S(1)	29.2.2 protein.synthesis.misc ribososomal protein
	AT5G15450.1	9	ClpB3 -HSP100 family		3742	72	122	plastid stroma	C	p1S(4); p2T(2); p3S(1); p2S(1); p3LM(1)	29.6 protein.folding
	AT5G15970.1	1	stress-induced protein (KIN2) / cold-regulated protein (COR6.6)		48	1	1		_	p1S(1)	20.2.2 stress.abiotic.cold; 31.1 cell.organisation
	AT5G16010.1	1	3-oxo-5-alpha-steroid 4-dehydrogenase (steroid 5-alpha-reductase) family		73	1	2		_	p3LM(1)	17.3.1.1.1 hormone metabolism.brassinosteroid.synthesis-degradation.BRs.DET2
	AT5G16390.1	7	biotin carboxyl carrier protein BCCP-1 - part of ACCase complex		519	10	19	envelope-inner-peripheral-stromal-side; plastid stroma	C	p2S(2); p3S(2); p3T(1); p2T(1); p3LM(1)	11.1.1 lipid metabolism.FA synthesis and FA elongation.Acetyl CoA Carboxylation
	AT5G16400.1	4	thioredoxin f2 (Trx F2)		440	6	7	plastid stroma	C	p2T(2); p3S(1); p1S(1)	21.1 redox.thioredoxin
	AT5G16440.1	3	isopentenyl diphosphate isomerase (IPP1)		211	7	7		C	p3S(2); p2S(1)	16.1.2.7 secondary metabolism.isoprenoids.mevalonate pathway.isopentenyl pyrophosphate:dimethyllallyl pyrophosphate isomerase
	AT5G16620.1	3	Tic40 (PDE120 - PIGMENT DEFECTIVE EMBRYO)		423	6	8	envelope-inner-integral	C	p3T(1); p2T(1); p3LM(1)	29.3.3 protein.targeting.chloroplast
	AT5G16630.1	1	DNA repair protein Rad4 family		36	1	1		C	p2T(1)	28.2 DNA.repair
	AT5G16660.1	4	expressed protein - C/M - envelope/thylakoid		682	7	10	envelope	C	p2T(2); p3T(1); p3LM(1)	35.2 not assigned.unknown
	AT5G16710.1	14	dehydroascorbate reductase-2 (DHAR-2), plastid		2950	53	102	plastid stroma	C	p1S(6); p2S(3); p3S(2); p3T(1); p2T(1); p3LM(1)	21.2.1 redox.ascorbate and glutathione.ascorbate
	AT5G16715.1	8	Val-tRNA synthetase (ValRS-2)- EMB2247 (EMBRYO DEFECTIVE 2247)		1423	56	77	plastid stroma	C	p3S(3); p1S(3); p2S(1); p3LM(1)	29.1.9 protein.aa activation. valine-tRNA ligase
	AT5G17170.1	5	expressed protein Rubredoxin and PDZ domain		1750	18	39	thylakoid	C	p2T(3); p3T(2)	29.8 protein assembly and cofactor ligation
	AT5G17230.1	2	PSY (PHYTOENE SYNTHASE); geranylgeranyl-diphosphate geranylgeranyltransferase		233	2	5		C	p3T(1); p2T(1)	16.1.4.1 secondary metabolism.isoprenoids.carotenoids.phytoene synthase
	AT5G17420.1	4	cellulose synthase, catalytic subunit (IRX3		165	4	8		_	p2T(3); p2S(1)	10.2.1 cell wall.cellulose synthesis.cellulose synthase
	AT5G17530.1	6	phosphoglucosamine mutase		1563	31	46	plastid stroma	M	p1S(3); p3S(1); p2S(1); p3LM(1)	4.2 glycolysis.PGM
	AT5G17560.1	6	BolA-like family protein		480	10	14	plastid stroma	C	p1S(4); p3S(1); p2S(1)	35.1 not assigned.no ontology
	AT5G17710.1	14	GrpE-1 (EMB1241 - EMBRYO DEFECTIVE 1241); adenyl-nucleotide exchange factor		2347	27	52	plastid stroma	C	p1S(6); p3S(5); p3LM(2); p2S(1)	29.6 protein.folding
	AT5G17920.1	10	5-methyltetrahydropteroyltriglutamate--homocysteine S-methyltransferase - ATCIMS - very abundant		2187	48	40	not plastid	_	p3S(5); p1S(3); p2S(1); p3LM(1)	13.1.3.4 amino acid metabolism.synthesis.aspartate family.methionine
	AT5G17990.1	23	anthranilate phosphoribosyltransferase - TRP1 (TRYPTOPHAN BIOSYNTHESIS 1)		2754	46	68	plastid stroma	C	p1S(10); p3S(4); p2S(4); p2T(2); p3LM(2); p3T(1)	13.1.6.5.2 amino acid metabolism.synthesis.aromatic aa.tryptophan.anthranilate phosphoribosyltransferase
	AT5G18660.1	6	3,8-divinyl protochlorophyllide a 8-vinyl reductase - DVR (PALE-GREEN AND CHLOROPHYLL B REDUCED 2)		775	13	19	plastid	C	p2S(2); p2T(2); p3T(1); p3LM(1)	19.13 tetrapyrrole synthesis.divinyl chlorophyllide-a 8-vinyl-reductase
	AT5G18770.1	1	F-box family protein		43	1	2		_	p2T(1)	29.5.11.4.3.2 protein.degradation.ubiquitin.E3.SCF.FBOX
	AT5G19220.1	28	ADP-glucose pyrophosphorylase (ADG2) (APL1)		5878	95	154	plastid stroma	C	p1S(17); p3S(4); p2S(3); p2T(2); p3T(1); p3LM(1)	2.1.2.1 major CHO metabolism.synthesis.starch.AGPase
	AT5G19370.1	7	rhodanese-like domain-containing protein / PPIC-type PPIASE domain-containing protein,		874	19	28	plastid	C	p1S(3); p3S(2); p2S(1); p3LM(1)	26.23 misc.rhodanese
	AT5G19460.1	3	nudix hydrolase family protein (ATNUDT20), Thiamine pyrophosphokinase (TPK)		128	3	3		C	p1S(2); p2S(1)	35.1 not assigned.no ontology
	AT5G19620.1	4	Toc75-V- putative protein outer membrane protein (IAP75)		781	11	17	envelope-outer	C	p3T(1); p3S(1); p1S(1); p3LM(1)	29.3.3 protein.targeting.chloroplast
	AT5G19750.1	7	22kDa peroxisomal membrane protein-like		674	7	10		C	p3S(2); p2T(2); p3LM(2); p2S(1)	35.1 not assigned.no ontology
	AT5G19940.1	12	fibrillin (FIB6)		2138	34	52	plastid	C	p2T(4); p3S(2); p2S(2); p3T(2); p3LM(2)	26.31* misc. fibrillins
	AT5G20140.1	3	SOUL heme-binding		395	4	7	thylakoid	C	p2T(2); p3T(1)	21.3 redox.heme
	AT5G20250.1	3	similar to alkaline alpha galactosidase		137	3	4		_	p1S(3)	3.1.2.2 minor CHO metabolism.raffinose family.raffinose synthases.putative
	AT5G20290.1	3	40S ribosomal protein S8 (RPS8A)		201	3	5	cytosol	_	p1S(2); p3LM(1)	29.2.2 protein.synthesis.misc ribososomal protein
	AT5G20720.1	19	Cpn21 (also Cpn20)		11407	156	298	plastid stroma	C	p1S(6); p3S(5); p2S(3); p3T(2); p2T(2); p3LM(1)	29.6 protein.folding
	AT5G20980.1	4	5-methyltetrahydropteroyltriglutamate-homocysteine S-methyltransferase		764	17	13		C	p1S(3); p3S(1)	13.1.3.4.3 amino acid metabolism.synthesis.aspartate family.methionine.methionine synthase
	AT5G21430.1	6	DnaJ domain family		1681	22	37	thylakoid-integral	C	p2T(4); p3T(2)	26.29* misc. DnaJ domain with unknown function
	AT5G22500.1	3	acyl CoA reductase, putative / male-sterility protein, putative		225	3	6		_	p2T(2); p3T(1)	11.9.4.13 lipid metabolism.lipid degradation.beta-oxidation.acyl CoA reductase
	AT5G22510.1	6	alkaline/neutral invertase - Amylo-alpha-1,6-glucosidase		685	15	21	plastid stroma	C	p1S(4); p2S(1); p3S(1)	2.2.1.3.1 major CHO metabolism.degradation.sucrose.invertases.neutral
	AT5G22580.1	2	expressed protein		93	2	2		_	p1S(1); p3LM(1)	35.2 not assigned.unknown
	AT5G22640.1	2	MORN (Membrane Occupation and Recognition Nexus) repeat EMB1211 (EMBRYO DEFECTIVE 1211)		229	4	6		_	p3T(1); p3LM(1)	35.1 not assigned.no ontology
	AT5G22800.1	11	Ala-tRNA synthetases (Ala-RS2) (dual targeted - cTP/mTP)		5743	89	148	mitochondria; plastid stroma	C	p1S(6); p2S(2); p3S(2); p3LM(1)	29.1.7 protein.aa activation.alanine-tRNA ligase
	AT5G22830.1	1	magnesium transporter protein (GMN10)		70	1	1		C	p2T(1)	34.14 transport.unspecified cations
	AT5G23010.1	1	2-isopropylmalate synthase - HMGL-like domain (MAM1)		37	1	1		C	p1S(1)	13.1.4.4.1 amino acid metabolism.synthesis.branched chain group.leucine specific.2-isopropylmalate synthase
	AT5G23040.1	5	expressed protein		499	8	9	envelope	C	p3S(2); p2S(1); p2T(1); p3LM(1)	35.2 not assigned.unknown
	AT5G23060.1	13	expressed protein - C/M		6892	79	151	thylakoid-integral	C	p2T(7); p3T(5); p3S(1)	35.2 not assigned.unknown
	AT5G23120.1	17	HCF136 Tat ltp		9181	115	210	thylakoid-peripheral-lumenal-side	C	p1S(6); p3S(3); p2S(3); p3T(2); p2T(2); p3LM(1)	29.8 protein assembly and cofactor ligation
	AT5G23310.1	3	iron superoxide dismutase (FSD3)		231	4	6	plastid	C	p3S(2); p1S(1)	21.6 redox.dismutases and catalases
	AT5G23440.1	1	ferredoxin-thioredoxin reductase -variable subunit (subunit A) (FTRv2)		43	1	1	plastid stroma	C	p2S(1)	21.1 redox.thioredoxin
	AT5G23890.1	8	expressed protein		1581	24	35	envelope	C	p2T(3); p3LM(2); p3T(1); p2S(1); p3S(1)	35.1 not assigned.no ontology
	AT5G24020.1	5	MinD		361	6	10	envelope-inner; plastid stroma	C	p1S(4); p3S(1)	31.2.5 cell.division.plastid
	AT5G24300.1	12	starch synthase 1 (SS1)		2050	43	67	plastid stroma	C	p1S(6); p2S(2); p2T(2); p3S(1); p3LM(1)	2.1.2.2 major CHO metabolism.synthesis.starch.starch synthase
	AT5G24400.1	6	glucosamine/galactosamine-6-phosphate isomerase - EMB2024 (EMBRYO DEFECTIVE 2024)		603	10	13	plastid stroma	C	p1S(3); p3S(2); p2S(1)	7.1.2 OPP.oxidative PP.6-phosphogluconolactonase
	AT5G24490.1	7	PSRP-1 associates with 30S		732	17	23	plastid stroma	C	p3T(2); p3S(1); p2S(1); p2T(1); p1S(1); p3LM(1)	29.2.1.99 protein.synthesis.chloroplast/mito.unknown
	AT5G24650.1	3	mitochondrial import inner membrane translocase subunit Tim17/Tim22/Tim22		428	5	10		_	p3LM(2); p2T(1)	29.3.2 protein.targeting.mitochondria
	AT5G24690.1	5	expressed protein		816	6	11		C	p3S(2); p3LM(2); p3T(1)	35.2 not assigned.unknown
	AT5G25980.2	8	myrosinase or thioglucoside glucohydrolase 2 (TGG2)		948	16	20	not plastid	S	p1S(6); p3S(1); p3LM(1)	16.5.1 secondary metabolism.sulfur-containing.glucosinolates
	AT5G26000.1	9	thioglucoside glucohydrolase 1 (TGG1) (myrosinase)		1625	29	47	not plastid	S	p1S(6); p2S(1); p3S(1); p3LM(1)	16.5.1 secondary metabolism.sulfur-containing.glucosinolates
	AT5G26570.1	14	phosphoglucan water dikinase (PWD)		6629	121	192	plastid stroma	C	p1S(4); p3S(3); p3T(2); p2S(2); p2T(2); p3LM(1)	2.2.2.3 major CHO metabolism.degradation.starch.glucan water dikinase
	AT5G26742.1	14	DEAD box RNA helicase (RH3) - mRNA etiolated seedling		3283	73	113	plastid stroma	C	p1S(7); p2S(2); p2T(2); p3T(1); p3S(1); p3LM(1)	27.5* RNA. DEAD/DEAH BOX helicase
	AT5G27290.1	1	unknown protein		123	2	3		M	p3T(1)	35.2 not assigned.unknown
	AT5G27390.1	3	expressed protein		235	4	5		C	p2T(2); p3T(1)	35.2 not assigned.unknown
	AT5G27560.1	4	expressed protein (homologue Synechocystis sp., PIR:S75312)		215	6	9	plastid	C	p2S(2); p3S(1); p2T(1)	35.2 not assigned.unknown
	AT5G28500.1	9	expressed protein		1101	13	20	plastid stroma	C	p3S(2); p2S(2); p2T(2); p1S(2); p3LM(1)	35.2 not assigned.unknown
	AT5G28540.1	1	luminal binding protein 1 precursor (BiP-1)		351	4	4	ER	S	p3LM(1)	29.6 protein.folding
	AT5G28623.1	1	expressed protein		37	1	1		_	p2T(1)	35.2 not assigned.unknown
	AT5G30510.1	40	30S ribosomal protein S1		5416	88	138	plastid ribosome	C	p1S(20); p2S(8); p3S(5); p2T(3); p3LM(3); p3T(1)	29.2.1.1 protein.synthesis.chloroplast/mito.plastid
	AT5G33320.1	6	PPT - IEP33 = Phosphate/phosphoenolpyruvate translocator		1296	13	23	envelope-inner-integral	C	p3LM(2); p3T(1); p3S(1); p2T(1); p1S(1)	34.8 transport.metabolite transporters at the envelope membrane
	AT5G35100.1	5	peptidyl-prolyl cis-trans isomerase cyclophilin-type family protein		377	6	9	plastid	C	p3T(2); p2S(1); p3S(1); p2T(1)	29.6 protein.folding
	AT5G35170.1	8	adenylate kinase		822	16	23	plastid	C	p2T(4); p3S(2); p2S(1); p3T(1)	23.4.1 nucleotide metabolism.phosphotransfer and pyrophosphatases.adenylate kinase
	AT5G35220.1	1	EGY1, thylakoid metalloprotease		178	2	3	thylakoid-integral	C	p3T(1)	29.5.7 protein.degradation.metalloprotease
	AT5G35360.1	11	acetyl-CoA carboxylase		1171	27	38	envelope-inner-peripheral-stromal-side	C	p1S(5); p2T(2); p3T(1); p2S(1); p3S(1); p3LM(1)	11.1.1 lipid metabolism.FA synthesis and FA elongation.Acetyl CoA Carboxylation
	AT5G35570.1	4	unknown protein (Duf246 domain)		160	4	4		C	p3S(3); p2T(1)	35.2 not assigned.unknown
	AT5G35630.1	57	glutamate-ammonia ligase (GS2), chloroplast		15323	238	497	plastid stroma	C	p1S(23); p3S(13); p2S(11); p2T(4); p3LM(4); p3T(2)	12.2.2 N-metabolism.ammonia metabolism.glutamine synthase
	AT5G35790.1	5	glucose-6-phosphate 1-dehydrogenase		807	20	33	plastid stroma	C	p1S(3); p3S(1); p2S(1)	7.1.1 OPP.oxidative PP.G6PD
	AT5G35970.1	10	Deadbox DNA helicase-related		3202	58	86	plastid stroma	C	p1S(6); p3S(1); p2S(1); p2T(1); p3LM(1)	28.5* DNA. DEAD BOX helicase
	AT5G36120.1	1	expressed protein - YGGT family		43	1	1		C	p3T(1)	35.2 not assigned.unknown
	AT5G36210.1	2	serine-type acylpeptidase (AARE2)		101	3	3		C	p3S(1); p1S(1)	29.5 protein.degradation
	AT5G36700.1	15	2-phosphoglycolate phosphatase-1 (PGP-1)	17)	6980	102	0	plastid stroma	C	p1S(5); p2S(3); p3S(2); p3T(2); p2T(2); p3LM(1)	1.2.1 PS.photorespiration.phosphoglycolate phosphatase
	AT5G36880.1	9	acetyl-CoA synthetase (acetate-CoA ligase)		1032	30	41	plastid stroma	C	p1S(5); p3S(2); p2S(1); p3LM(1)	11.1.8 lipid metabolism.FA synthesis and FA elongation.acyl coa ligase
	AT5G37360.1	6	expressed protein -		1362	15	24	thylakoid	C	p2T(4); p3T(1); p3LM(1)	35.2 not assigned.unknown
	AT5G37510.1	1	NADH-ubiquinone dehydrogenase, mitochondrial		82	2	3	mitochondria	M	p3LM(1)	9.1.2 mitochondrial electron transport / ATP synthesis.NADH-DH.localisation not clear
	AT5G38410.1	48	Rubisco small subunit 3b (RBCS-3B)	18)	35056	261	0	plastid stroma	C	p1S(14); p3S(12); p2S(8); p2T(5); p3LM(5); p3T(4)	1.3.2 PS.calvin cyle.rubisco small subunit
	AT5G38430.1	28	Rubisco small subunit 1b (RBCS-1b)		29688	181	172	plastid stroma	C	p3S(8); p1S(8); p2S(6); p3LM(3); p2T(2); p3T(1)	1.3.2 PS.calvin cyle.rubisco small subunit
	AT5G38520.1	5	hydrolase		438	12	18	thylakoid	C	p3S(1); p2S(1); p3T(1); p2T(1); p3LM(1)	35.1 not assigned.no ontology
	AT5G38660.1	9	expressed protein - (APE1) (ACCLIMATION OF PHOTOSYNTHESIS TO ENVIRONMENT)		1589	35	55	thylakoid	C	p2T(5); p3T(2); p1S(1); p3LM(1)	35.2 not assigned.unknown
	AT5G39210.1	2	CRR7- novel subunit NDH complex		176	2	3	thylakoid	C	p1S(2)	1.1.6 PS.lightreaction.NADH DH
	AT5G39830.1	1	DegP8 - HhoA homologue or DegQ		53	2	3	thylakoid-peripheral-lumenal-side	C	p3T(1)	29.5.5 protein.degradation.serine protease
	AT5G40390.1	1	SIP1 (SEED IMBIBITION 1-LIKE); galactinol-sucrose galactosyltransferase/ hydrolase		40	1	1		_	p3S(1)	3.1.2.1 minor CHO metabolism.raffinose family.raffinose synthases.known
	AT5G40450.1	1	unknown protein		190	4	5		_	p3S(1)	35.2 not assigned.unknown
	AT5G40950.1	15	50S ribosomal protein L27		1299	26	55	plastid ribosome	C	p3S(5); p1S(4); p3T(2); p2S(2); p2T(1); p3LM(1)	29.2.1.1 protein.synthesis.chloroplast/mito.plastid
	AT5G41620.1	1	unknown protein		43	1	1		M	p2T(1)	35.1 not assigned.no ontology
	AT5G41670.1	6	6-phosphogluconate dehydrogenase-2 - vey abundant		913	14	13	not plastid	S	p1S(3); p3S(2); p2S(1)	7.1.3 OPP.oxidative PP.6-phosphogluconate dehydrogenase
	AT5G42070.1	1	expressed protein		45	1	1		C	p2T(1)	35.2 not assigned.unknown
	AT5G42130.1	6	mitochondrial substrate carrier family protein		1242	15	23	envelope	_	p3T(2); p2S(1); p3S(1); p2T(1); p3LM(1)	34.9 transport.metabolite transporters at the mitochondrial membrane
	AT5G42270.1	10	FtsH5 (VAR1)		9600	100	67	thylakoid-integral	C	p2T(8); p3T(2)	29.5.7 protein.degradation.metalloprotease
	AT5G42310.1	2	pentatricopeptide repeat (PPR) protein		100	3	3		M	p1S(2)	26.54* misc. Pentapeptide repeat (PPR) unknown function
	AT5G42390.1	13	stromal processing peptidase (SPP)		2046	54	77	plastid stroma	C	p3S(4); p1S(4); p2S(2); p2T(2); p3LM(1)	29.9* protein.processing
	AT5G42480.1	4	Arc6 (AtFN2) DnaJ family		752	13	18	envelope-inner	C	p3LM(2); p3T(1); p2T(1)	31.2.5 cell.division.plastid
	AT5G42590.1	1	CYP71A16 (cytochrome P450, family 71, subfamily A, polypeptide 16); oxygen binding		39	1	1		S	p2S(1)	26.1 misc.cytochrome P450
	AT5G42650.1	20	allene oxide synthase (AOS)		5684	75	123	plastoglobules; thylakoid-peripheral-stromal-side	C	p3S(6); p2T(6); p3T(3); p1S(3); p2S(1); p3LM(1)	17.7.1.3 hormone metabolism.jasmonate.synthesis-degradation.allene oxidase synthase
	AT5G42765.1	5	Expressed protein - new lumenal protein?		372	8	9	thylakoid	C	p2T(3); p3T(2)	35.2 not assigned.unknown
	AT5G42960.1	1	OEP24-II		193	2	4	envelope-outer	_	p3LM(1)	35.2 not assigned.unknown
	AT5G42980.1	1	thioredoxin h3 (Trx H3)		35	1	1		_	p3S(1)	21.1 redox.thioredoxin
	AT5G43745.1	1	phosphotransferase-related		133	2	1		C	p3LM(1)	35.1 not assigned.no ontology
	AT5G43750.1	3	expressed protein		248	5	7	thylakoid	_	p2T(2); p3T(1)	35.2 not assigned.unknown
	AT5G43780.1	1	ATPsulfurylase-4 (APS4)		148	1	2	plastid	C	p3S(1)	14.1 S-assimilation.APS
	AT5G44520.1	4	ribose 5-phosphate isomerase-related		389	6	7		C	p1S(2); p3S(1); p2S(1)	1.3.10 PS.calvin cyle.Rib5P Isomerase; 7.2.4 OPP.non-reductive PP.ribose 5-phosphate isomerase
	AT5G44650.1	4	expressed protein		338	6	7	thylakoid	C	p2T(3); p3T(1)	35.2 not assigned.unknown
	AT5G45170.1	9	lectin domain protein (CBBY-related)		2458	45	76	plastid stroma	C	p1S(5); p2S(2); p3S(1); p3LM(1)	35.2 not assigned.unknown
	AT5G45390.1	22	ClpP4		5458	63	122	plastid stroma; thylakoid-peripheral-stromal-side	C	p3S(9); p1S(5); p2S(3); p3LM(3); p3T(2)	29.5.5 protein.degradation.serine protease
	AT5G45520.1	3	expressed protein		124	3	5		_	p2T(3)	35.2 not assigned.unknown
	AT5G45680.1	4	AtFKBP13 - lTP-TAT (involved with Rieske)		539	9	13	thylakoid-peripheral-lumenal-side	C	p2T(2); p3T(1); p3S(1)	29.8 protein assembly and cofactor ligation
	AT5G45930.1	3	Mg-protoporphyrin IX chelatase - CHLI-2		346	9	2	plastid	C	p1S(2); p2S(1)	19.1 tetrapyrrole synthesis.magnesium chelatase
	AT5G46110.1	17	TPT - IEP30 = Phosphate/triose-phosphate translocator		3519	46	116	envelope-inner-integral	M	p2T(4); p3LM(4); p3T(3); p2S(2); p3S(2); p1S(2)	34.8 transport.metabolite transporters at the envelope membrane
	AT5G46290.1	19	Ketoacyl-ACP Synthase I (Lipid Gene Database; Beisson)		2422	27	42	plastid stroma	C	p1S(7); p3S(5); p2S(4); p3LM(2); p2T(1)	11.1.3 lipid metabolism.FA synthesis and FA elongation.ketoacyl ACP synthase
	AT5G46580.1	2	pentatricopeptide repeat (PPR) protein		145	3	4		C	p3T(1); p3LM(1)	26.54* misc. Pentapeptide repeat (PPR) unknown function
	AT5G46795.1	1	MSP2 (MICROSPORE-SPECIFIC PROMOTER 2)		39	1	2		_	p2S(1)	35.2 not assigned.unknown
	AT5G46800.1	1	mitochondrial carnitine/acyl (CAC) carrier, putative / a bout de souffle (BOU) / CAC-like protein,		103	1	2		_	p3LM(1)	34.9 transport.metabolite transporters at the mitochondrial membrane
	AT5G47110.1	3	Lil3.1		443	6	9	thylakoid-integral	C	p2T(2); p3T(1)	1.1.8* light stress chlorophyll binding
	AT5G47190.1	10	50S ribosomal protein L19		1590	38	54	plastid ribosome	C	p3S(4); p1S(3); p2S(1); p3T(1); p3LM(1)	29.2.1.1 protein.synthesis.chloroplast/mito.plastid
	AT5G47760.1	1	phosphoglycolate phosphatase, putative		147	2	2		_	p3S(1)	35.1 not assigned.no ontology
	AT5G47840.1	12	adenylate kinase or ATP-AMP transphosphorylase		1421	24	42	plastid stroma	C	p3S(5); p1S(4); p2S(2); p3LM(1)	23.4.1 nucleotide metabolism.phosphotransfer and pyrophosphatases.adenylate kinase
	AT5G47860.1	3	expressed protein		121	3	3		C	p3S(2); p1S(1)	35.2 not assigned.unknown
	AT5G47870.1	4	expressed protein		397	7	10	plastid	C	p2T(2); p2S(1); p1S(1)	35.2 not assigned.unknown
	AT5G48220.1	8	indole-3-glycerol phosphate synthase (IGPS)		1060	27	38	plastid stroma	C	p2S(3); p1S(3); p3S(2)	13.1.6.5.4 amino acid metabolism.synthesis.aromatic aa.tryptophan.indole-3-glycerol phosphate synthase
	AT5G48300.1	28	ADP-glucose pyrophosphorylase - small subunit 1 (APS1)		7605	119	205	plastid stroma	C	p1S(18); p3S(3); p2S(3); p2T(2); p3T(1); p3LM(1)	2.1.2.1 major CHO metabolism.synthesis.starch.AGPase
	AT5G48390.1	3	tetratricopeptide repeat (TPR)-containing protein		150	3	5		_	p2T(2); p3T(1)	26.33* misc. tetratricopeptide repeat (TPR) unknown function
	AT5G48790.1	3	expressed protein		252	6	9	thylakoid	C	p3T(2); p2T(1)	35.2 not assigned.unknown
	AT5G48960.1	6	similarity to 5'-nucleotidase		1247	27	44	plastid stroma	C	p1S(3); p2S(1); p3S(1); p3LM(1)	23.2 nucleotide metabolism.degradation
	AT5G49030.1	13	Ile-tRNA synthetase class II - OVA2 (OVULE ABORTION 2)		3094	69	104	plastid stroma	C	p1S(6); p3S(4); p2S(1); p2T(1); p3LM(1)	29.1.5 protein.aa activation.isoleucine-tRNA ligase
	AT5G49910.1	16	cpHSP70-2 (Dnak homologue)		10626	164	100	plastid stroma	C	p1S(6); p3S(3); p2S(3); p2T(2); p3T(1); p3LM(1)	29.6 protein.folding
	AT5G49940.1	3	CnfU-V - 2Fe-2S assembly PSI & Fd (also NFU-2)		169	3	3	plastid stroma	C	p1S(2); p3S(1)	29.8.1* protein assembly and cofactor ligation. Fe-S assembly
	AT5G50250.1	6	31 kDa ribonucleoprotein (AtRBP33)		819	11	17	plastid stroma	C	p3S(2); p1S(2); p2S(1); p3LM(1)	27.4 RNA.RNA binding
	AT5G50920.1	27	ClpC1 (also named HSP93-V) - very similar to ClpC3		28002	436	496	envelope-inner-peripheral-stromal-side; plastid stroma	C	p1S(12); p3S(5); p2T(4); p2S(3); p3LM(2); p3T(1)	29.5.5 protein.degradation.serine protease
	AT5G51070.1	17	ClpD (Erd1)		3572	59	64	plastid stroma	C	p1S(9); p3S(3); p3LM(2); p2S(1); p3T(1); p2T(1)	29.5.5 protein.degradation.serine protease
	AT5G51100.1	9	iron superoxide dismutase		916	17	26	plastid stroma	C	p1S(5); p3S(2); p2S(1); p2T(1)	21.6 redox.dismutases and catalases
	AT5G51110.1	10	expressed protein		1261	13	20	plastid stroma	C	p3S(4); p1S(4); p2S(1); p2T(1)	35.2 not assigned.unknown
	AT5G51545.1	2	LPA2 - PSII assembly factor associates with ALB3		385	4	6	thylakoid-integral	C	p2T(2)	35.2 not assigned.unknown
	AT5G51720.1	8	expressed protein		722	8	14	plastid	_	p1S(6); p3S(1); p2S(1)	35.2 not assigned.unknown
	AT5G51820.1	20	plastid phosphoglucomutase (PGM1) (starch free mutant 1)		6611	115	217	plastid stroma	C	p3S(6); p2S(4); p2T(4); p1S(4); p3T(1); p3LM(1)	4.2 glycolysis.PGM
	AT5G52100.1	3	CRR1 - biogenesis/stabilization NDH complex		381	7	8	plastid stroma	C	p1S(2); p3S(1)	29.8 protein assembly and cofactor ligation
	AT5G52440.1	5	hcf106 TatB		544	5	8	thylakoid-integral	C	p3T(2); p2T(2); p3LM(1)	29.3.3 protein.targeting.chloroplast
	AT5G52520.1	10	tRNA synthetase class II (dual targeted- cTP/mTP)		868	22	28	mitochondria; plastid stroma	C	p1S(6); p3S(2); p2S(1); p3LM(1)	29.1.40 protein.aa activation.bifunctional aminoacyl-tRNA synthetase
	AT5G52780.1	3	expressed protein		430	3	5		M	p2T(2); p3T(1)	35.2 not assigned.unknown
	AT5G52810.1	1	ornithine cyclodeaminase/mu-crystallin family protein		65	1	1		C	p3S(1)	16.99 secondary metabolism.unspecified
	AT5G52920.1	6	pyruvate kinase-2 (typically homotetramer)		540	13	17	plastid stroma	C	p1S(3); p3S(1); p2S(1); p3LM(1)	11.1.30 lipid metabolism.FA synthesis and FA elongation.pyruvate kinase
	AT5G52970.1	7	thylakoid lumen 15 kDa protein		796	10	17	thylakoid-peripheral-lumenal-side	C	p1S(4); p2T(2); p3T(1)	35.1 not assigned.no ontology
	AT5G53170.1	3	FtsH11		775	10	15	mitochondria; plastid	C	p2S(1); p2T(1); p3LM(1)	29.5.7 protein.degradation.metalloprotease
	AT5G53460.1	11	NADH-GOGAT or NADH- glutamate synthase (GLT1)		9974	217	354	plastid	C	p1S(3); p2S(2); p3S(2); p2T(2); p3T(1); p3LM(1)	12.2.1 N-metabolism.ammonia metabolism.glutamate synthase
	AT5G53490.1	11	peptapetide repeat TL17.4 (PPR)		1434	27	44	thylakoid-peripheral-lumenal-side	C	p3S(5); p2T(2); p3T(1); p2S(1); p1S(1); p3LM(1)	26.54* misc. Pentapeptide repeat (PPR) unknown function
	AT5G53580.1	3	aldo/keto reductase family protein		224	4	6	plastid	_	p2T(2); p3T(1)	3.5 minor CHO metabolism.others
	AT5G53850.2	3	haloacid dehalogenase-like hydrolase		378	5	8		_	p1S(2); p3S(1)	3.5 minor CHO metabolism.others
	AT5G53860.1	1	EMB2737 (EMBRYO DEFECTIVE 2737)		150	2	3		M	p3LM(1)	35.2 not assigned.unknown
	AT5G53890.1	2	leucine-rich repeat transmembrane protein kinase, putative		101	2	2		S	p2T(2)	30.2.10 signalling.receptor kinases.leucine rich repeat X
	AT5G54180.1	1	mitochondrial transcription termination factor-related / mTERF-related, contains Pfam profile PF02536: mTERF		135	1	2		C	p3T(1)	27.3.99 RNA.regulation of transcription.unclassified
	AT5G54270.1	27	LHCII-3		6601	71	106	thylakoid-integral	C	p3T(7); p2T(7); p3S(6); p1S(5); p3LM(2)	1.1.1.1 PS.lightreaction.photosystem II.LHC-II
	AT5G54600.1	11	50S ribosomal protein L24, chloroplast (CL24)		935	23	38	plastid ribosome	C	p3S(5); p2S(2); p2T(2); p3T(1); p3LM(1)	29.2.1.1 protein.synthesis.chloroplast/mito.plastid
	AT5G54770.1	26	THI1 -involved in thiamine synthesis (vitamine B) (ARA6)		5609	72	135	mitochondria; plastid stroma	C	p1S(8); p3S(6); p2S(4); p2T(4); p3T(2); p3LM(2)	18.2 Co-factor and vitamine metabolism.thiamine
	AT5G54810.1	2	tryptophan synthase, beta subunit 1 (TSB1)		618	8	8	plastid	C	p3S(1); p2S(1)	13.1.6.5.5 amino acid metabolism.synthesis.aromatic aa.tryptophan.tryptophan synthase
	AT5G55220.1	22	Trigger Factor		2534	53	77	plastid stroma	C	p1S(10); p3S(4); p2S(3); p2T(2); p3LM(2); p3T(1)	29.6 protein.folding
	AT5G55280.1	10	plastid division protein FtsZ-1		1412	22	36	plastid stroma	C	p1S(6); p3S(3); p3LM(1)	31.2.5 cell.division.plastid
	AT5G55710.1	3	expressed protein - Tic20-related		402	5	9	plastid	C	p2T(2); p3T(1)	35.2 not assigned.unknown
	AT5G56500.2	6	Cpn60-beta-3 - model .2 has higher score than model .1		3732	49	8	plastid stroma	C	p1S(3); p2T(2); p3S(1)	29.6 protein.folding
	AT5G56730.1	1	peptidase M16 family		70	2	2		_	p3LM(1)	29.5.7 protein.degradation.metalloprotease
	AT5G57040.1	2	lactoylglutathione lyase family protein / glyoxalase I		103	2	2		C	p3S(1); p1S(1)	13.2.3.2 amino acid metabolism.degradation.aspartate family.threonine; 24.2 Biodegradation of Xenobiotics.lactoylglutathione lyase
	AT5G57170.1	1	macrophage migration inhibitory factor family protein / MIF family protein		110	1	2		_	p3S(1)	35.1 not assigned.no ontology
	AT5G57850.1	10	aminotransferase class IV		1327	29	42	plastid stroma	C	p1S(7); p2S(1); p3S(1); p3LM(1)	26.26.1 misc.aminotransferases.aminotransferase class IV family protein
	AT5G57960.1	3	GTP-binding family protein		182	4	5	plastid stroma	C	p1S(2); p2S(1)	30.5 signalling.G-proteins
	AT5G58250.1	10	expressed protein		1498	21	28	plastid	C	p3S(4); p1S(3); p3T(2); p2T(1)	35.2 not assigned.unknown
	AT5G58260.1	6	NDH N		830	17	29	thylakoid	C	p2T(4); p3T(2)	1.1.6 PS.lightreaction.NADH DH
	AT5G58270.1	2	ABC transporter family protein - possibly also envelope		356	6	10	mitochondria	M	p2S(1); p3LM(1)	34.16 transport.ABC transporters and multidrug resistance systems
	AT5G58330.1	21	malate dehydrogenase [NADP]		4399	65	122	plastid stroma	C	p3S(8); p1S(7); p2S(2); p2T(2); p3T(1); p3LM(1)	8.2.99 TCA / org. transformation.other organic acid transformaitons.misc
	AT5G58470.1	1	RRM and Zn finger Ran domain protein		37	1	1		_	p3T(1)	27.3.99 RNA.regulation of transcription.unclassified
	AT5G58510.1	1	expressed protein		36	1	1		_	p2T(1)	35.2 not assigned.unknown
	AT5G58770.1	3	dehydrodolichyl diphosphate synthase, putative / DEDOL-PP synthase, putative		160	5	6		M	p1S(2); p3S(1)	35.1 not assigned.no ontology
	AT5G58870.1	1	FtsH9		294	3	7		C	p3LM(1)	29.5.7 protein.degradation.metalloprotease
	AT5G59250.1	4	sugar transporter family		264	7	10	envelope	C	p2T(2); p3T(1); p3LM(1)	34.2 transporter.sugars
	AT5G59750.1	4	riboflavin biosynthesis protein, putativ, GTP cyclohydrolase II; 3,4-dihydroxy-2-butanone 4-phosphate synthase (DHBP synthase))		194	5	6	plastid	M	p1S(2); p3S(1); p2S(1)	18.3.1 Co-factor and vitamine metabolism.riboflavin.GTP cyclohydrolase II
	AT5G60600.1	22	GcpE protein (CLB4)		6664	108	179	plastid stroma	C	p1S(11); p2S(4); p3S(3); p2T(2); p3T(1); p3LM(1)	16.1.1.6 secondary metabolism.isoprenoids.non-mevalonate pathway.HDS
	AT5G60720.1	3	expressed protein, DUF547 domain		160	3	5		C	p2T(2); p3S(1)	35.2 not assigned.unknown
	AT5G61190.1	1	RRM and Zn finger Ran domain protein		45	1	1		_	p3T(1)	27.3.99 RNA.regulation of transcription.unclassified
	AT5G61410.1	23	ribulose-5-phosphate-3-epimerase (RPE)		10060	65	189	plastid stroma	C	p3S(7); p1S(7); p2S(4); p3T(2); p2T(2); p3LM(1)	1.3.11 PS.calvin cyle.RPE
	AT5G61560.1	2	protein kinase family protein		78	2	2		_	p2T(1); p1S(1)	29.4.1 protein.postranslational modification.kinase
	AT5G61790.1	1	calnexin 1 (CNX1)		82	2	4		S	p3LM(1)	30.3 signalling.calcium
	AT5G62140.1	2	expressed protein		94	3	5		C	p3T(2)	35.2 not assigned.unknown
	AT5G62790.1	10	1-deoxy-D-xylulose 5-phosphate reductoisomerase (DXR)		2024	26	43	plastid stroma	C	p1S(5); p2S(2); p2T(2); p3S(1)	16.1.1.2 secondary metabolism.isoprenoids.non-mevalonate pathway.DXR
	AT5G63040.1	1	unknown protein		75	2	2		C	p3LM(1)	35.2 not assigned.unknown
	AT5G63060.1	4	transporter		218	4	7	plastid	C	p1S(3); p2S(1)	34.99 transport.misc
	AT5G63100.1	2	expressed protein		207	2	3		M	p2S(1); p1S(1)	35.2 not assigned.unknown
	AT5G63310.1	23	NDPK2-stromal		2194	43	74	plastid stroma	C	p1S(8); p3S(5); p2T(4); p2S(2); p3T(2); p3LM(2)	23.4.10 nucleotide metabolism.phosphotransfer and pyrophosphatases.nucleoside diphosphate kinase
	AT5G63420.1	11	RNA-metabolising metallo-beta-lactamase		1944	69	97	plastid stroma	C	p1S(5); p3S(2); p2S(1); p3T(1); p2T(1); p3LM(1)	23.2 nucleotide metabolism.degradation
	AT5G63570.1	18	glutamate-1-semialdehyde 2,1-aminomutase 1 (GSA 1)		6317	96	72	plastid stroma	C	p1S(8); p3S(4); p2S(3); p3T(1); p2T(1); p3LM(1)	19.3 tetrapyrrole synthesis.GSA
	AT5G63890.2	11	histidinol dehydrogenase (ATHDH) - model .1 has no N-terminal cTP - use model .2		1249	14	29	plastid stroma	C	p2S(4); p1S(3); p3S(2); p3T(1); p3LM(1)	13.1.7.8 amino acid metabolism.synthesis.histidine.histidinol dehydrogenase
	AT5G64040.1	8	psaN - TAT LTP -		1821	25	58	thylakoid-peripheral-lumenal-side	C	p2T(2); p1S(2); p2S(1); p3T(1); p3S(1); p3LM(1)	1.1.2.2 PS.lightreaction.photosystem I.PSI polypeptide subunits
	AT5G64050.1	6	glutamate-tRNA ligase family protein (dual target- cTP/mTP) (OVULE ABORTION 3)		734	9	14	mitochondria; plastid stroma	M	p1S(2); p3S(1); p2S(1); p2T(1); p3LM(1)	19.1 tetrapyrrole synthesis.glu-tRNA synthetase; 29.1.17 protein.aa activation.glutamate-tRNA ligase
	AT5G64290.1	14	2-oxoglutarate/malate translocator (DiT1).		1594	21	37	envelope-inner-integral	C	p2S(7); p3S(2); p3LM(2); p3T(1); p2T(1); p1S(1)	34.8 transport.metabolite transporters at the envelope membrane
	AT5G64300.1	6	ATGCH (Arabidopsis thaliana GTP cyclohydrolase II); 3,4-dihydroxy-2-butanone-4-phosphate synthase/ GTP cyclohydrolase II		581	17	24	plastid	C	p1S(3); p2S(1); p3S(1); p3LM(1)	18.3.1 Co-factor and vitamine metabolism.riboflavin.GTP cyclohydrolase II
	AT5G64380.1	7	fructose-bisphosphatase		511	11	12	plastid	M	p1S(3); p2S(2); p3S(1); p3LM(1)	1.3.7 PS.calvin cyle.FBPase
	AT5G64580.1	2	FtsH putative????		284	3	4		C	p2T(1); p3LM(1)	29.5.7 protein.degradation.metalloprotease
	AT5G64860.1	4	disproportionating enzyme 1 (DPE1) or D-enzyme		285	11	13	plastid	C	p1S(2); p3S(1); p2S(1)	2.2.2.4 major CHO metabolism.degradation.starch.D enzyme
	AT5G64940.1	3	ABC1 kinase family (ABC1K5)		939	18	28	plastid	C	p2T(2); p3T(1)	26.56* misc.ABC1k family
	AT5G65220.1	15	50S ribosomal protein L29p family		3290	34	69	plastid ribosome	C	p1S(9); p2T(2); p3T(1); p3S(1); p2S(1); p3LM(1)	29.2.1.1 protein.synthesis.chloroplast/mito.plastid
	AT5G65620.1	9	Zn oligopeptidase A (M3 family)		2936	59	96	plastid stroma	C	p1S(3); p3S(2); p2T(2); p2S(1); p3LM(1)	29.5.7 protein.degradation.metalloprotease
	AT5G65780.1	8	branched-chain amino acid aminotransferase 5 (BCAT5) - mitochondrial?		819	16	17		C	p1S(6); p2S(2)	13.1.4.1 amino acid metabolism.synthesis.branched chain group.common
	AT5G65840.1	9	putative - alkyl hydroperoxide reductase and thiol-specific antioxidant		1853	31	54	plastid stroma	C	p3S(5); p1S(2); p2S(1); p3LM(1)	21 redox
	AT5G66090.1	3	UspA domain protein (stress)		236	3	4	plastid stroma	C	p1S(2); p3S(1)	35.2 not assigned.unknown
	AT5G66120.2	8	3-dehydroquinate synthase, putative - only model .2 has N-terminal cTP		993	21	28	plastid	C	p2S(3); p1S(3); p3S(2)	13.1.6.1.2 amino acid metabolism.synthesis.aromatic aa.chorismate.3-dehydroquinate synthase; 18.5 Co-factor and vitamine metabolism.folate & vitamine K
	AT5G66190.1	21	FNR-1		8481	123	195	thylakoid-peripheral-stromal-side	C	p1S(8); p2T(5); p3T(4); p2S(2); p3S(1); p3LM(1)	1.1.7 PS.lightreaction.ferredoxin reductase
	AT5G66470.1	1	GTP binding / RNA binding / nucleic acid binding		67	1	2		C	p2S(1)	35.2 not assigned.unknown
	AT5G66530.1	13	aldose 1-epimerase		3204	48	83	plastid stroma	C	p1S(5); p3S(3); p2S(3); p2T(1); p3LM(1)	3.5 minor CHO metabolism.others
	AT5G66550.1	8	Maf family protein		665	15	19	plastid	M	p3S(4); p1S(3); p2S(1)	35.1 not assigned.no ontology
	AT5G66570.1	28	psbO OEC33		11975	167	136	thylakoid-peripheral-lumenal-side	C	p2T(12); p3T(6); p1S(5); p2S(2); p3LM(2); p3S(1)	1.1.1.2 PS.lightreaction.photosystem II.PSII polypeptide subunits
	AT5G67030.1	16	zeaxanthin epoxidase precursor (LOS6/ABA1)(ZEP) - also envelope?		4312	60	91	thylakoid	C	p1S(6); p3S(3); p2S(2); p2T(2); p3LM(2); p3T(1)	16.1.4 secondary metabolism.isoprenoids.carotenoids
	ATCG00020.1	35	psbA D1		8238	96	284	thylakoid-integral	c-enc	p2T(18); p3T(9); p2S(3); p3S(2); p3LM(2); p1S(1)	1.1.1.2 PS.lightreaction.photosystem II.PSII polypeptide subunits
	ATCG00120.1	42	CF1a - atpA		19389	239	648	thylakoid-peripheral-stromal-side	c-enc	p2T(18); p3T(8); p1S(6); p2S(4); p3S(3); p3LM(3)	1.1.4 PS.lightreaction.ATP synthase
	ATCG00130.1	17	CFO-I - atpF		4202	77	151	thylakoid-integral	c-enc	p3T(5); p2T(4); p3S(3); p1S(3); p2S(1); p3LM(1)	1.1.4 PS.lightreaction.ATP synthase
	ATCG00150.1	4	CFO-IV - atpI		201	6	8	thylakoid-integral	c-enc	p3T(3); p2T(1)	1.1.4 PS.lightreaction.ATP synthase
	ATCG00160.1	17	30S rps2 ribosomal protein S2		2732	50	81	plastid ribosome	c-enc	p1S(8); p3S(5); p2S(2); p2T(1); p3LM(1)	29.2.1.1 protein.synthesis.chloroplast/mito.plastid
	ATCG00170.1	10	rpoC2 RNA polymerase (PEP) beta		1485	25	39	plastid stroma	c-enc	p1S(6); p2T(2); p3T(1); p2S(1)	27.2 RNA.transcription
	ATCG00180.1	6	rpoC1 RNA polymerase (PEP) beta		644	13	19	plastid stroma	c-enc	p1S(3); p2T(2); p3T(1)	27.2 RNA.transcription
	ATCG00190.1	7	rpoB RNA polymerase (PEP) beta chain		790	19	28	plastid stroma	c-enc	p1S(3); p2T(2); p2S(1); p3LM(1)	27.2 RNA.transcription
	ATCG00270.1	44	psbD D2		23233	210	626	thylakoid-integral	c-enc	p2T(20); p3T(10); p1S(6); p2S(3); p3LM(3); p3S(2)	1.1.1.2 PS.lightreaction.photosystem II.PSII polypeptide subunits
	ATCG00280.1	54	psbC CP43		24449	245	710	thylakoid-integral	c-enc	p2T(20); p3T(9); p3S(8); p2S(7); p1S(6); p3LM(4)	1.1.1.2 PS.lightreaction.photosystem II.PSII polypeptide subunits
	ATCG00330.1	5	30S chloroplast ribosomal protein S14		312	6	11	plastid ribosome	c-enc	p2S(2); p3S(2); p3LM(1)	29.2.1.1 protein.synthesis.chloroplast/mito.plastid
	ATCG00340.1	36	psaB - subunit Ib		11843	142	362	thylakoid-integral	c-enc	p2T(14); p1S(9); p3T(7); p3S(3); p3LM(2); p2S(1)	1.1.2.2 PS.lightreaction.photosystem I.PSI polypeptide subunits
	ATCG00350.1	38	psaA - subunit Ia		5566	101	228	thylakoid-integral	c-enc	p2T(11); p3T(10); p3S(6); p1S(5); p3LM(4); p2S(2)	1.1.2.2 PS.lightreaction.photosystem I.PSI polypeptide subunits
	ATCG00380.1	28	30S rps4 ribosomal protein S4		4835	110	186	plastid ribosome	c-enc	p1S(16); p3S(5); p2S(3); p2T(2); p3T(1); p3LM(1)	29.2.1.1 protein.synthesis.chloroplast/mito.plastid
	ATCG00420.1	14	NDH J		1224	22	36	thylakoid	c-enc	p3S(5); p1S(4); p3T(2); p2T(2); p3LM(1)	1.1.6 PS.lightreaction.NADH DH
	ATCG00430.1	1	NDH K		37	1	1	thylakoid	c-enc	p3T(1)	1.1.6 PS.lightreaction.NADH DH
	ATCG00440.1	1	NDH C (3)		112	1	1	thylakoid-integral	c-enc	p3T(1)	1.1.6 PS.lightreaction.NADH DH
	ATCG00470.1	13	CF1e - atpE		3743	44	88	thylakoid-peripheral-stromal-side	c-enc	p3T(4); p2T(4); p1S(3); p2S(1); p3S(1)	1.1.4 PS.lightreaction.ATP synthase
	ATCG00480.1	54	CF1b - atpB		52357	465	1461	thylakoid-peripheral-stromal-side	c-enc	p2T(20); p3S(11); p3T(10); p1S(7); p2S(3); p3LM(3)	1.1.4 PS.lightreaction.ATP synthase
	ATCG00490.1	97	Rubisco large subunit (RBCL)		110320	1198	5076	plastid stroma	c-enc	p1S(36); p2T(19); p3S(14); p2S(13); p3T(9); p3LM(6)	1.3.1 PS.calvin cyle.rubisco large subunit
	ATCG00500.1	8	accD acetyl-CoA carboxylase beta subunit		709	10	15	plastid stroma	c-enc	p1S(3); p2T(2); p2S(1); p3S(1); p3LM(1)	11.1.31 lipid metabolism.FA synthesis and FA elongation.pyruvate DH
	ATCG00520.1	3	YCF4 PSI assembly		318	6	12	plastid stroma	c-enc	p2T(2); p3T(1)	29.8 protein assembly and cofactor ligation
	ATCG00540.1	28	petA - cytochrome f (cleavable ss of 35 aa)		6724	104	240	thylakoid-integral	c-enc	p2T(13); p3T(7); p1S(4); p3S(2); p2S(1); p3LM(1)	1.1.3 PS.lightreaction.cytochrome b6/f
	ATCG00570.1	2	psbF cytb559b		88	2	4	thylakoid-integral	c-enc	p2T(2)	1.1.1.2 PS.lightreaction.photosystem II.PSII polypeptide subunits
	ATCG00580.1	6	psbE cytb559a		729	10	38	thylakoid-integral	c-enc	p3T(2); p2T(2); p2S(1); p3LM(1)	1.1.1.2 PS.lightreaction.photosystem II.PSII polypeptide subunits
	ATCG00640.1	8	50S rpl33 ribosomal protein L33		644	8	14	plastid ribosome	c-enc	p1S(5); p3S(1); p2S(1); p3LM(1)	29.2.1.1 protein.synthesis.chloroplast/mito.plastid
	ATCG00650.1	11	30S rps18 ribosomal protein S18		708	14	23	plastid ribosome	c-enc	p1S(5); p2T(2); p3LM(2); p2S(1); p3T(1)	29.2.1.1 protein.synthesis.chloroplast/mito.plastid
	ATCG00660.1	22	50S rpl20 ribosomal protein L20		2635	30	54	plastid ribosome	c-enc	p1S(8); p3S(5); p2S(3); p3LM(3); p2T(2); p3T(1)	29.2.1.1 protein.synthesis.chloroplast/mito.plastid
	ATCG00670.1	16	ClpP1		3480	36	55	plastid stroma; thylakoid-inner-peripheral-stromal-side	c-enc	p3S(5); p1S(5); p2T(2); p3LM(2); p3T(1); p2S(1)	29.5.5 protein.degradation.serine protease
	ATCG00680.1	40	psbB CP47		32532	258	776	thylakoid-integral	c-enc	p2T(20); p3T(8); p3S(5); p1S(3); p2S(2); p3LM(2)	1.1.1.2 PS.lightreaction.photosystem II.PSII polypeptide subunits
	ATCG00710.1	6	psbH-phospho		459	6	22	thylakoid-integral	c-enc	p2T(3); p2S(1); p3T(1); p3S(1)	1.1.1.2 PS.lightreaction.photosystem II.PSII polypeptide subunits
	ATCG00720.1	38	petB - Cytochrome b6		9565	76	205	thylakoid-integral	c-enc	p2T(15); p3T(10); p3S(5); p1S(5); p2S(2); p3LM(1)	1.1.3 PS.lightreaction.cytochrome b6/f
	ATCG00730.1	4	petD - subIV		407	6	16	thylakoid-integral	c-enc	p2T(2); p2S(1); p3T(1)	1.1.3 PS.lightreaction.cytochrome b6/f
	ATCG00740.1	5	rpoA RNA polymerase (PEP) alpha chain		612	7	13	plastid stroma	c-enc	p1S(5)	27.2 RNA.transcription
	ATCG00750.1	50	30S rps11 ribosomal protein S11		6065	86	139	plastid ribosome	c-enc	p1S(33); p3S(6); p2S(5); p3LM(3); p3T(2); p2T(1)	29.2.1.1 protein.synthesis.chloroplast/mito.plastid
	ATCG00760.1	1	50S rpl36 ribosomal protein L36		45	1	1	plastid ribosome	c-enc	p3S(1)	29.2.1.1 protein.synthesis.chloroplast/mito.plastid
	ATCG00770.1	12	30S rps8 ribosomal protein S8		3561	50	95	plastid ribosome	c-enc	p1S(6); p2T(2); p2S(1); p3S(1); p3T(1); p3LM(1)	29.2.1.1 protein.synthesis.chloroplast/mito.plastid
	ATCG00780.1	12	50S rpl14 ribosomal protein L14		3393	44	84	plastid ribosome	c-enc	p1S(6); p2T(2); p2S(1); p3S(1); p3T(1); p3LM(1)	29.2.1.1 protein.synthesis.chloroplast/mito.plastid
	ATCG00790.1	10	50S rpl16 ribosomal protein L16		1579	24	43	plastid ribosome	c-enc	p3S(5); p1S(2); p3T(1); p2S(1); p3LM(1)	29.2.1.1 protein.synthesis.chloroplast/mito.plastid
	ATCG00800.1	42	30S rps3 ribosomal protein S3		6298	113	209	plastid ribosome	c-enc	p1S(26); p3S(7); p2S(4); p3LM(3); p3T(1); p2T(1)	29.2.1.1 protein.synthesis.chloroplast/mito.plastid
	ATCG00810.1	3	50S rpl22 ribosomal protein L22		383	9	16	plastid ribosome	c-enc	p1S(2); p3S(1)	29.2.1.1 protein.synthesis.chloroplast/mito.plastid
	ATCG00820.1	11	30S rps19 ribosomal protein S19		690	22	31	plastid ribosome	c-enc	p1S(5); p2T(2); p3S(1); p2S(1); p3T(1); p3LM(1)	29.2.1.1 protein.synthesis.chloroplast/mito.plastid
	ATCG00830.1	17	50S rpl2.1 ribosomal protein L2	19)	2947	58	0	plastid ribosome	c-enc	p1S(7); p2S(3); p3S(2); p3T(2); p2T(2); p3LM(1)	29.2.1.1 protein.synthesis.chloroplast/mito.plastid
	ATCG00840.1	3	50S rpl23.1 ribosomal protein L23	20)	349	7	0	plastid ribosome	c-enc	p3S(1); p2S(1); p3LM(1)	29.2.1.1 protein.synthesis.chloroplast/mito.plastid
	ATCG00860.1	2	YCF2 essential	21)	634	12	0	plastid stroma	c-enc	p2S(1); p3LM(1)	29.8 protein assembly and cofactor ligation
	ATCG00900.1	12	30S rps7.1 ribosomal protein S7	22)	1996	57	0	plastid ribosome	c-enc	p3S(5); p2S(2); p2T(2); p3T(1); p1S(1); p3LM(1)	29.2.1.1 protein.synthesis.chloroplast/mito.plastid
	ATCG01010.1	2	NDH F (5)		675	13	19	thylakoid-peripheral-stromal-side	c-enc	p2T(2)	1.1.6 PS.lightreaction.NADH DH
	ATCG01050.1	2	NDH (4)		248	4	8	thylakoid	c-enc	p2T(2)	1.1.6 PS.lightreaction.NADH DH
	ATCG01060.1	9	psaC - subunit VII - stromal side		1063	10	18	thylakoid-peripheral-stromal-side	c-enc	p1S(5); p2T(2); p3T(1); p3LM(1)	1.1.2.2 PS.lightreaction.photosystem I.PSI polypeptide subunits
	ATCG01090.1	11	NDH I		1219	20	37	thylakoid-peripheral-stromal-side	c-enc	p3S(4); p2T(4); p3T(2); p2S(1)	1.1.6 PS.lightreaction.NADH DH
	ATCG01100.1	11	NDH A (1)		1297	12	18	thylakoid-integral	c-enc	p2T(5); p3T(4); p1S(1); p3LM(1)	1.1.6 PS.lightreaction.NADH DH
	ATCG01110.1	13	NDH 7		2562	45	73	thylakoid	c-enc	p1S(4); p2S(3); p3S(2); p2T(2); p3T(1); p3LM(1)	1.1.6 PS.lightreaction.NADH DH
	ATCG01120.1	12	30S rps15 ribosomal protein S15		1815	25	44	plastid ribosome	c-enc	p1S(6); p2T(2); p2S(1); p3S(1); p3T(1); p3LM(1)	29.2.1.1 protein.synthesis.chloroplast/mito.plastid
	ATCG01130.1	6	YCF1.2		2668	81	123	thylakoid-integral	c-enc	p2S(2); p2T(2); p3T(1); p3LM(1)	29.8 protein assembly and cofactor ligation
	Columns are as follows: Accession – only one gene model shown, either the one with the highest Mowse score, or the lowest accession number, in the case of equal Mowse scores; Lab Annot. - protein description based on cross-referencing the literature and previously obtained data; Amb. Group – accession numbers of ambiguous proteins; ΣMowse – summed Mowse identification scores across all preparatio…
	1)	AT5G59970.1; AT2G28740.1; AT3G46320.1; AT1G07820.1; AT3G45930.1; AT1G07820.2; AT3G53730.1; AT5G59690.1;
	2)	AT2G37470.1; AT5G02570.1; AT5G22880.1; AT2G28720.1; AT3G46030.1; AT5G59910.1; AT3G45980.1;
	3)	AT1G07940.1; AT1G07930.1; AT5G60390.1; AT1G07940.2;
	4)	AT1G80300.1;
	5)	AT1G70580.1;
	6)	AT1G24909.1; AT1G25083.1; AT1G25220.1; AT1G25155.1;
	7)	AT1G29920.1;
	8)	AT2G34590.1;
	9)	AT3G53870.1;
	10)	AT3G53430.1; AT5G60670.1;
	11)	AT3G59890.1;
	12)	AT5G27850.1;
	13)	AT3G11130.1;
	14)	AT5G39740.1;
	15)	AT3G27850.1;
	16)	AT5G08680.1; AT5G08690.1;
	17)	AT5G36790.1;
	18)	AT5G38420.1;
	19)	ATCG01310.1;
	20)	ATCG01300.1;
	21)	ATCG01280.1;
	22)	ATCG01240.1;
