# Supplementary material for: Sorting Signals, N-Terminal Modifications and Abundance of the Chloroplast Proteome
Source: PLoS One. 2008 Apr 23;3(4):e1994. doi: 10.1371/journal.pone.0001994 (PMC2291561; doi:10.1371/journal.pone.0001994)
Supplement: Table S4 — Identified and annotated proteins from filtered experimental MS/MS experiments and additional 200 annotated chloroplast proteins from literature. (0.26 MB XLS) [file pone.0001994.s005.xls]

## Sheet: supplTable5
	Supplemental Table 5. Identified and annotated proteins from filtered experimental MS/MS experiments (814 proteins, including non-chloroplast contaminants and proteins that could not be assigned with certainty to a location) and additional 200 annotated chloroplast proteins from literature. 916 proteins are assigned to the chloroplast, of which 33 may have a dual location.
	accession	protein name	Filtered LTQ chloroplast (769)	Filtered Q-TOF stroma (351)	Filtered Q-TOF Stripped Thylakoid (129)	Filtered QTOF PG (31)	Literature only (200)	assigned to plastid	curated location	TargetP	MapMan Bin
	ATCG00330.1	30S chloroplast ribosomal protein S14	YES	NO	NO	NO		c-enc	plastid ribosome	C	29.2.1.1 protein.synthesis.chloroplast/mito.plastid
	ATCG00420.1	NDH J	YES	NO	NO	NO		c-enc	thylakoid	C	1.1.6 PS.lightreaction.NADH DH
	ATCG00520.1	YCF4 PSI assembly	YES	NO	NO	NO		c-enc	plastid stroma	C	29.8 protein assembly and cofactor ligation
	ATCG00640.1	50S rpl33 ribosomal protein L33	YES	NO	NO	NO		c-enc	plastid ribosome	C	29.2.1.1 protein.synthesis.chloroplast/mito.plastid
	ATCG00660.1	50S rpl20 ribosomal protein L20	YES	NO	NO	NO		c-enc	plastid ribosome	C	29.2.1.1 protein.synthesis.chloroplast/mito.plastid
	ATCG00750.1	30S rps11 ribosomal protein S11	YES	YES	NO	NO		c-enc	plastid ribosome	C	29.2.1.1 protein.synthesis.chloroplast/mito.plastid
	ATCG00770.1	30S rps8 ribosomal protein S8	YES	YES	NO	NO		c-enc	plastid ribosome	C	29.2.1.1 protein.synthesis.chloroplast/mito.plastid
	ATCG00780.1	50S rpl14 ribosomal protein L14	YES	YES	NO	NO		c-enc	plastid ribosome	C	29.2.1.1 protein.synthesis.chloroplast/mito.plastid
	ATCG00790.1	50S rpl16 ribosomal protein L16	YES	YES	NO	NO		c-enc	plastid ribosome	C	29.2.1.1 protein.synthesis.chloroplast/mito.plastid
	ATCG00810.1	50S rpl22 ribosomal protein L22	YES	NO	NO	NO		c-enc	plastid ribosome	C	29.2.1.1 protein.synthesis.chloroplast/mito.plastid
	ATCG00830.1	50S rpl2.1 ribosomal protein L2	YES	NO	NO	NO		c-enc	plastid ribosome	C	29.2.1.1 protein.synthesis.chloroplast/mito.plastid
	ATCG00840.1	50S rpl23.1 ribosomal protein L23	YES	NO	NO	NO		c-enc	plastid ribosome	C	29.2.1.1 protein.synthesis.chloroplast/mito.plastid
	ATCG00860.1	YCF2 essential	YES	NO	NO	NO		c-enc	plastid stroma	C	29.8 protein assembly and cofactor ligation
	ATCG00900.1	30S rps7.1 ribosomal protein S7	YES	NO	NO	NO		c-enc	plastid ribosome	C	29.2.1.1 protein.synthesis.chloroplast/mito.plastid
	ATCG01100.1	NDH A (1)	YES	NO	NO	NO		c-enc	thylakoid-integral	C	1.1.6 PS.lightreaction.NADH DH
	ATCG01130.1	YCF1.2	YES	NO	NO	NO		c-enc	thylakoid-integral	C	29.8 protein assembly and cofactor ligation
	ATCG00480.1	CF1b - atpB	YES	YES	YES	YES		c-enc	thylakoid-peripheral-stromal-side	C	1.1.4 PS.lightreaction.ATP synthase
	ATCG00120.1	CF1a - atpA	YES	YES	YES	YES		c-enc	thylakoid-peripheral-stromal-side	C	1.1.4 PS.lightreaction.ATP synthase
	ATCG01240.1	30S ribosomal protein S7	NO	YES	NO	NO		c-enc	plastid ribosome	C	29.2.1.1 protein.synthesis.chloroplast/mito.plastid
	ATCG00500.1	accD acetyl-CoA carboxylase beta subunit	YES	NO	NO	NO		c-enc	plastid stroma	C	11.1.31 lipid metabolism.FA synthesis and FA elongation.pyruvate DH
	ATCG00490.1	Rubisco large subunit (RBCL)	YES	YES	YES	NO		c-enc	plastid stroma	C	1.3.1 PS.calvin cyle.rubisco large subunit
	ATCG00650.1	30S rps18 ribosomal protein S18	YES	NO	NO	NO		c-enc	plastid ribosome	C	29.2.1.1 protein.synthesis.chloroplast/mito.plastid
	ATCG00670.1	ClpP1	YES	YES	NO	NO		c-enc	plastid stroma; thylakoid-inner-peripheral-stromal-side	C	29.5.5 protein.degradation.serine protease
	ATCG01090.1	NDH I	YES	NO	NO	NO		c-enc	thylakoid-peripheral-stromal-side	C	1.1.6 PS.lightreaction.NADH DH
	ATCG00130.1	CFO-I - atpF	YES	NO	YES	NO		c-enc	thylakoid-integral	C	1.1.4 PS.lightreaction.ATP synthase
	ATCG00340.1	psaB - subunit Ib	YES	NO	YES	NO		c-enc	thylakoid-integral	C	1.1.2.2 PS.lightreaction.photosystem I.PSI polypeptide subunits
	ATCG00350.1	psaA - subunit Ia	YES	NO	YES	NO		c-enc	thylakoid-integral	C	1.1.2.2 PS.lightreaction.photosystem I.PSI polypeptide subunits
	ATCG00540.1	petA - cytochrome f (cleavable ss of 35 aa)	YES	NO	YES	NO		c-enc	thylakoid-integral	C	1.1.3 PS.lightreaction.cytochrome b6/f
	ATCG00580.1	psbE cytb559a	YES	NO	YES	NO		c-enc	thylakoid-integral	C	1.1.1.2 PS.lightreaction.photosystem II.PSII polypeptide subunits
	ATCG00710.1	psbH-phospho	YES	NO	YES	NO		c-enc	thylakoid-integral	C	1.1.1.2 PS.lightreaction.photosystem II.PSII polypeptide subunits
	ATCG00720.1	petB - Cytochrome b6	YES	NO	YES	NO		c-enc	thylakoid-integral	C	1.1.3 PS.lightreaction.cytochrome b6/f
	ATCG00730.1	petD - subIV	YES	NO	NO	NO		c-enc	thylakoid-integral	C	1.1.3 PS.lightreaction.cytochrome b6/f
	ATCG01060.1	psaC - subunit VII - stromal side	YES	NO	YES	NO		c-enc	thylakoid-peripheral-stromal-side	C	1.1.2.2 PS.lightreaction.photosystem I.PSI polypeptide subunits
	ATCG00270.1	psbD D2	YES	NO	YES	NO		c-enc	thylakoid-integral	C	1.1.1.2 PS.lightreaction.photosystem II.PSII polypeptide subunits
	ATCG00680.1	psbB CP47	YES	NO	YES	NO		c-enc	thylakoid-integral	C	1.1.1.2 PS.lightreaction.photosystem II.PSII polypeptide subunits
	ATCG00470.1	CF1e - atpE	YES	NO	YES	NO		c-enc	thylakoid-peripheral-stromal-side	C	1.1.4 PS.lightreaction.ATP synthase
	ATCG00160.1	30S rps2 ribosomal protein S2	YES	YES	NO	NO		c-enc	plastid ribosome	C	29.2.1.1 protein.synthesis.chloroplast/mito.plastid
	ATCG00020.1	psbA D1	YES	NO	YES	YES		c-enc	thylakoid-integral	C	1.1.1.2 PS.lightreaction.photosystem II.PSII polypeptide subunits
	ATCG00280.1	psbC CP43	YES	NO	YES	NO		c-enc	thylakoid-integral	C	1.1.1.2 PS.lightreaction.photosystem II.PSII polypeptide subunits
	ATCG00380.1	30S rps4 ribosomal protein S4	YES	YES	NO	NO		c-enc	plastid ribosome	C	29.2.1.1 protein.synthesis.chloroplast/mito.plastid
	ATCG01110.1	NDH 7	YES	NO	NO	NO		c-enc	thylakoid	C	1.1.6 PS.lightreaction.NADH DH
	ATCG00820.1	30S rps19 ribosomal protein S19	YES	YES	NO	NO		c-enc	plastid ribosome	C	29.2.1.1 protein.synthesis.chloroplast/mito.plastid
	ATCG01120.1	30S rps15 ribosomal protein S15	YES	NO	NO	NO		c-enc	plastid ribosome	C	29.2.1.1 protein.synthesis.chloroplast/mito.plastid
	ATCG00170.1	rpoC2 RNA polymerase (PEP) beta	YES	NO	NO	NO		c-enc	plastid stroma	C	27.2 RNA.transcription
	ATCG00180.1	rpoC1 RNA polymerase (PEP) beta	YES	NO	NO	NO		c-enc	plastid stroma	C	27.2 RNA.transcription
	ATCG00190.1	rpoB RNA polymerase (PEP) beta chain	YES	NO	NO	NO		c-enc	plastid stroma	C	27.2 RNA.transcription
	ATCG00800.1	30S rps3 ribosomal protein S3	YES	YES	NO	NO		c-enc	plastid ribosome	C	29.2.1.1 protein.synthesis.chloroplast/mito.plastid
	AT5G01650.1	macrophage migration inhibitory factor family protein / MIF family protein	YES	NO	NO	NO				_	35.1 not assigned.no ontology
	AT1G13930.1	expressed protein - weak similarity to 60S ribosomal su	YES	NO	NO	NO				_	20.2.99 protein.synthesis.misc
	AT4G14880.1	cysteine synthase / O-acetylserine (thiol)-lyase / O-acetylserine sulfhydrylase (OAS1) - very abundant	YES	NO	NO	NO				_	13.1.5.3.1 amino acid metabolism.synthesis.serine-glycine-cysteine group.cysteine.OASTL
	AT4G09320.1	NDPK1 - very abundant	YES	NO	NO	NO				_	23.4.10 nucleotide metabolism.phosphotransfer and pyrophosphatases.nucleoside diphosphate kinase
	AT5G53850.1	haloacid dehalogenase-like hydrolase	YES	NO	NO	NO				_	3.5 minor CHO metabolism.others
	AT3G44310.1	nitrilase 1 (NIT1 or NITI)	YES	NO	NO	NO				_	17.2.1 hormone metabolism.auxin.synthesis-degradation
	AT1G31160.1	protein kinase C (inhibitor) (Zinc-binding protein)	YES	NO	NO	NO				C	29.4 protein.postranslational modification
	AT1G30120.1	Plastidial Pyruvate Dehydrogenase E1 -beta subunit	YES	NO	NO	NO				C	11.1.31 lipid metabolism.FA synthesis and FA elongation.pyruvate DH
	AT2G47730.1	glutathione transferase (GST6) - very abundant	YES	YES	NO	NO				C	26.9 misc.glutathione S transferases
	AT5G13420.1	transaldolase-1 - very abundant	NO	YES	NO	NO				C	7.2.2 OPP.non-reductive PP.transaldolase
	AT5G16440.1	isopentenyl diphosphate isomerase (IPP1)	YES	NO	NO	NO				C	16.1.2.7 secondary metabolism.isoprenoids.mevalonate pathway.isopentenyl pyrophosphate:dimethyllallyl pyrophosphate isomerase
	AT4G35630.1	phosphoserine aminotransferase - abundant	YES	YES	NO	NO				C	13.1.5.1.2 amino acid metabolism.synthesis.serine-glycine-cysteine group.serine.phosphoserine aminotransferase
	AT5G10160.1	beta-hydroxyacyl-ACP dehydratase, plastid (Lipid Gene Database; Beisson)	YES	NO	NO	NO				C	11.1.5 lipid metabolism.FA synthesis and FA elongation.beta hydroxyacyl ACP dehydratase
	AT4G13430.1	aconitase - abundant	YES	NO	NO	NO				C	8.2.3 TCA / org. transformation.other organic acid transformaitons.aconitase
	AT5G65780.1	branched-chain amino acid aminotransferase 5 (BCAT5) - mitochondrial?	YES	NO	NO	NO				C	13.1.4.1 amino acid metabolism.synthesis.branched chain group.common
	AT5G14590.1	isocitrate dehydrogenase [NAD+],	YES	NO	NO	NO				C	8.1.4 TCA / org. transformation.TCA.IDH
	AT1G31860.1	histidine biosynthesis bifunctional protein (HISIE) or phosphoribosyl-ATP pyrophosphohydrolase	YES	NO	NO	NO				M	13.1.7.2 amino acid metabolism.synthesis.histidine.phosphoribosyl-ATP diphosphatase
	AT4G34620.1	30S ribosomal protein S16p family	YES	YES	NO	NO				M	29.2.2 protein.synthesis.misc ribososomal protein
	AT3G27890.1	NADPH-dependent FMN reductase - very abundant?	YES	YES	NO	NO				M	35.1 not assigned.no ontology
	AT3G62530.1	PBS lyase HEAT-like repeat-containing protein	YES	NO	NO	NO				M	35.1 not assigned.no ontology
	AT1G05580.1	atchx23; Na+(K+)/H+ exchanger	NO	NO	NO	NO	YES	p	envelope	_	34.12 transport.metal
	AT1G26340.1	cytochrome b5 (Tail anchor)	NO	NO	NO	NO	YES	p	envelope	_	21.3 redox.heme
	AT1G58200.1	Mechanosensitive ion channel MSL3	NO	NO	NO	NO	YES	p	envelope	_	31.2.5 cell.division.plastid
	AT2G16070.2	Plastid Division 2 (PDV2) (gene model 1??)	NO	NO	NO	NO	YES	p	envelope	_	31.2.5 cell.division.plastid
	AT5G42130.1	mitochondrial substrate carrier family protein	YES	NO	NO	NO		p	envelope	_	34.9 transport.metabolite transporters at the mitochondrial membrane
	AT2G42770.1	peroxisomal membrane protein family (22 kDa)	YES	NO	NO	NO		p	envelope	_	35.1 not assigned.no ontology
	AT3G49560.1	similar to inner membrane translocase subunit Tim17 (maye outer p. envelope)	YES	NO	NO	NO		p	envelope	_	29.3.2 protein.targeting.mitochondria
	AT1G19800.1	TDG1 - permease	NO	NO	NO	NO	YES	p	envelope-inner-integral	_	34.8 transport.metabolite transporters at the envelope membrane
	AT1G68570.1	Nitrite transporter (CsNitrl1) -proton-dependent oligopeptide transport (POT) protein	NO	NO	NO	NO	YES	p	envelope-inner-integral	_	12 N-metabolism
	AT3G11200.1	Plastidial Linoleate Desaturase (FAD7/FAD8) (Lipid Gene Database: Beisson)	NO	NO	NO	NO	YES	p	envelope-inner-integral	_	11.2.3 lipid metabolism.FA desaturation.omega 3 desaturase
	AT3G26570.1	PHt2;1 Phosphate translocator - Na+/Pi transporter	NO	NO	NO	NO	YES	p	envelope-inner-integral	_	34.7 transport.phosphate
	AT5G19760.1	oxoglutarate/malate translocator	NO	NO	NO	NO	YES	p	envelope-inner-integral	_	34.8 transport.metabolite transporters at the envelope membrane
	AT4G13010.1	ceQORH - oxidoreductase, Zn binding dehydrogenase family	NO	NO	NO	NO	YES	p	envelope-inner-peripheral-stromal-side	_	26.7 misc.oxidases - copper, flavone etc.
	AT1G45170.1	OEP24-II	NO	NO	NO	NO	YES	p	envelope-outer	_	35.1 not assigned.no ontology
	AT3G19720.1	Arc5-1	NO	NO	NO	NO	YES	p	envelope-outer	_	31.2.5 cell.division.plastid
	AT4G09080.1	Toc75-IV	NO	NO	NO	NO	YES	p	envelope-outer	_	29.3.3 protein.targeting.chloroplast
	AT1G76405.1	OEP21-I	NO	NO	NO	NO	YES	p	envelope-outer	_	35.2 not assigned.unknown
	AT4G15440.1	Hydroperoxide Lyase (HPL) like protein	NO	NO	NO	NO	YES	p	envelope-outer	_	35.1 not assigned.no ontology
	AT2G28900.1	OEP16 - HP15	NO	NO	NO	NO	YES	p	envelope-outer	_	34.8 transport.metabolite transporters at the envelope membrane
	AT5G42960.1	OEP24-II	NO	NO	NO	NO	YES	p	envelope-outer	_	35.2 not assigned.unknown
	AT2G16640.1	Toc132	NO	NO	NO	NO	YES	p	envelope-outer	_	29.3.3 protein.targeting.chloroplast
	AT3G52230.1	OM24 orthologue	YES	NO	YES	NO		p	envelope-outer	_	35.2 not assigned.unknown
	AT4G02510.1	OEP86 (TOC159) (putative chloroplast outer envelope 86-like protein) OEP75 (TOC75)	YES	NO	NO	NO		p	envelope-outer	_	29.3.3 protein.targeting.chloroplast
	AT5G53280.1	Plastid Division 1 (PDV1)	NO	NO	NO	NO	YES	p	envelope-outer-integral	_	31.2.5 cell.division.plastid
	AT3G63160.1	OEP6	NO	NO	NO	NO	YES	p	envelope-outer-integral	_	35.2 not assigned.unknown
	AT5G05000.1	Toc34, component of the import apparatus, GTP binding domain	NO	NO	NO	NO	YES	p	envelope-outer-integral	_	29.3.3 protein.targeting.chloroplast
	AT1G02280.1	Toc33	YES	NO	NO	NO		p	envelope-outer-integral	_	29.3.3 protein.targeting.chloroplast
	AT1G06820.1	carotenoid isomerase CRTISO	NO	NO	NO	NO	YES	p	plastid	_	16.1.4 secondary metabolism.isoprenoids.carotenoids
	AT1G27680.1	ADP-glucose pyrophosphorylase - large subunit 2 (APL2)	NO	NO	NO	NO	YES	p	plastid	_	2.1.2.1 major CHO metabolism.synthesis.starch.AGPase
	AT1G64860.1	SIG1 sigma factor (SigA)	NO	NO	NO	NO	YES	p	plastid	_	27.2 RNA.transcription
	AT1G78390.1	11,12 (11',12') 9-cis-epoxycarotenoid dioxygenase, putative (NCED9)	NO	NO	NO	NO	YES	p	plastid	_	16.1.4 secondary metabolism.isoprenoids.carotenoids
	AT2G21590.1	ADP-glucose pyrophosphorylase - large subunit 4 (APL4)	NO	NO	NO	NO	YES	p	plastid	_	2.1.2.1 major CHO metabolism.synthesis.starch.AGPase
	AT2G34630.1	geranyl diphosphate synthase (GPPS)	NO	NO	NO	NO	YES	p	plastid	_	16.1.1 secondary metabolism.isoprenoids.non-mevalonate pathway
	AT3G63110.1	IPT3	NO	NO	NO	NO	YES	p	plastid	_	17.4.1 hormone metabolism.cytokinin.synthesis-degradation
	AT4G18350.1	11,12 (11',12') 9-cis-epoxycarotenoid dioxygenase, putative (NCED2)	NO	NO	NO	NO	YES	p	plastid	_	16.1.4 secondary metabolism.isoprenoids.carotenoids
	AT4G31050.1	lipoyl transferase -lip2 plastid	NO	NO	NO	NO	YES	p	plastid	_	18.11 Co-factor and vitamine metabolism.lipoic acid
	AT4G39210.1	ADP-glucose pyrophosphorylase - large subunit 3 (APL3)	NO	NO	NO	NO	YES	p	plastid	_	2.1.2.1 major CHO metabolism.synthesis.starch.AGPase
	AT5G15860.1	quinolate phosphoribosyltransferase (NAD biosynthesis)	NO	NO	NO	NO	YES	p	plastid	_	18.21* Co-factor and vitamine metabolism.NAD/NADP
	AT2G45350.1	CRR4 - PPR protein - editing ndhD	NO	NO	NO	NO	YES	p	plastid	_	27.1.5* RNA.editing
	AT4G20010.1	Organellar single-stranded DNA binding protein 2 (OSB2) - also PTAC9 - nucleoid	NO	NO	NO	NO	YES	p	plastid	_	28.3* DNA.plastid nucleoid interacting
	AT2G22450.1	riboflavin biosynthesis protein, putative	YES	NO	NO	NO		p	plastid	_	18.3.1 Co-factor and vitamine metabolism.riboflavin.GTP cyclohydrolase II
	AT4G22930.1	dihydroorotase, mitochondrial / DHOase (PYR4)	YES	NO	NO	NO		p	plastid	_	23.1.1.3 nucleotide metabolism.synthesis.pyrimidine.dihydroorotase
	AT4G34820.1	expressed protein	YES	NO	NO	NO		p	plastid	_	35.2 not assigned.unknown
	AT5G51720.1	expressed protein	YES	NO	NO	NO		p	plastid	_	35.2 not assigned.unknown
	AT5G53580.1	aldo/keto reductase family protein	YES	NO	NO	NO		p	plastid	_	3.5 minor CHO metabolism.others
	AT3G04340.1	FtsH protease family (new plastid member)	YES	NO	NO	NO		p	plastid	_	29.5.7 protein.degradation.metalloprotease
	AT1G35720.1	Annexin - AnnAt1	YES	NO	NO	NO		p	plastid	_	31.1 cell.organisation
	AT1G01790.1	K+ efflux antiporter, putitive (KEA1)	YES	NO	NO	NO		p	plastid	_	34.15 transport.potassium
	AT4G16060.1	expressed protein	YES	YES	NO	NO		p	plastid	_	35.2 not assigned.unknown
	AT1G64810.1	APO1 (accumulation PSI) ; 4Fe-4S assembly and nucleoid binding	NO	NO	NO	NO	YES	p	plastid stroma	_	29.8 protein assembly and cofactor ligation
	AT1G12520.1	Cu-metallo chaperone (AtCCS)	YES	NO	NO	NO		p	plastid stroma	_	15.2 metal handling.binding, chelation and storage
	AT3G52750.1	FtsZ2.2 plastid division - tubulin motifs	YES	NO	NO	NO		p	plastid stroma	_	31.2.5 cell.division.plastid
	AT4G26300.1	Arg-tRNA synthetase	YES	NO	NO	NO		p	plastid stroma	_	29.1.19 protein.aa activation.arginine-tRNA ligase
	AT5G14740.1	beta carbonic anhydrase 2 (CA2) - gene model with cTP	YES	NO	NO	NO		p	plastid stroma	_	8.3 TCA / org. transformation.carbonic anhydrases
	AT4G25100.1	FE-SOD -1 (FSD1)	YES	YES	NO	NO		p	plastid stroma	_	21.6 redox.dismutases and catalases
	AT3G01500.1	beta carbonic anhydrase-1 (beta CA1) - the gene model is incorrect - it lacks the cTP	YES	YES	NO	NO		p	plastid stroma	_	8.3 TCA / org. transformation.carbonic anhydrases
	AT4G15530.1	pyruvate phosphate dikinase (PPDK) spluce form 1- plastid	YES	YES	NO	NO		p	plastid stroma	_	4.4 glycolysis.PPFK
	AT2G19940.1	N-acetyl-gamma-glutamyl-phosphate reductase	YES	YES	NO	NO		p	plastid stroma	_	13.1.2.3 amino acid metabolism.synthesis.glutamate family.arginine
	AT2G45990.1	expressed protein	YES	YES	NO	NO		p	plastid stroma	_	35.2 not assigned.unknown
	AT3G05350.1	aminopeptidase (M24) (APP2)	YES	YES	NO	NO		p	plastid stroma	_	29.5 protein.degradation
	AT5G03650.1	starch branching enzyme class II (SBEII)	YES	YES	NO	NO		p	plastid stroma	_	2.1.2.3 major CHO metabolism.synthesis.starch.starch branching
	AT5G14200.1	3-isopropylmalate dehydrogenase-2, chloroplast	YES	YES	NO	NO		p	plastid stroma	_	13.1.4.4.3 amino acid metabolism.synthesis.branched chain group.leucine specific.3-isopropylmalate dehydrogenase
	AT1G09340.1	Rap38 or CSP41B	YES	YES	NO	NO		p	plastid stroma; plastoglobules	_	27 RNA
	AT1G33810.1	expressed protein	YES	NO	YES	NO		p	thylakoid	_	35.2 not assigned.unknown
	AT3G59780.1	expressed protein	YES	NO	NO	NO		p	thylakoid	_	35.2 not assigned.unknown
	AT5G07020.1	proline-rich protein family	YES	NO	YES	NO		p	thylakoid	_	35.1.42 not assigned.no ontology.proline rich family
	AT5G43750.1	expressed protein	NO	NO	YES	NO		p	thylakoid	_	35.2 not assigned.unknown
	AT1G08550.1	Violaxanthin Deepoxidase (VDE)	YES	NO	NO	NO		p	thylakoid-peripheral-lumenal-side	_	16.1.4.21 secondary metabolism.isoprenoids.carotenoids.violaxanthin de-epoxidase
	AT1G14830.1	dynamin ADL1-thylakoid	NO	NO	NO	NO	YES	p	thylakoid-peripheral-stromal-side	_	26.17 misc.dynamin
	AT2G42130.4	fibrillin (FIB7b) - model .4 scores better than models 1-3 and 5	YES	YES	NO	YES		p	thylakoid-peripheral-stromal-side	_	26.31* misc. fibrillins
	AT3G47070.1	phosphoprotein -peripheral thylakoid	YES	NO	YES	NO		p	thylakoid-peripheral-stromal-side	_	35.2 not assigned.unknown
	AT2G05620.1	PGR5	YES	NO	NO	NO		p	thylakoid-peripheral-stromal-side	_	1.1.40 PS.lightreaction.cyclic electron flow-chlororespiration
	AT5G10490.1	Mechanosensitive ion channel MSL2	NO	NO	NO	NO	YES	p	envelope	C	31.2.5 cell.division.plastid
	AT4G39460.1	S-Adenosylmethionine transporter (SAMT1)	NO	NO	NO	NO	YES	p	envelope	C	34.8 transport.metabolite transporters at the envelope membrane
	AT5G23040.1	expressed protein	YES	NO	NO	NO		p	envelope	C	35.2 not assigned.unknown
	AT5G08540.1	expressed protein - maybe RNA binding?	YES	NO	NO	NO		p	envelope	C	35.2 not assigned.unknown
	AT2G44640.1	expressed protein	YES	NO	NO	NO		p	envelope	C	35.2 not assigned.unknown
	AT5G16660.1	expressed protein - C/M - envelope/thylakoid	YES	NO	NO	NO		p	envelope	C	35.2 not assigned.unknown
	AT4G14070.1	Plastidial Long-Chain Acyl-CoA Synthetase (Lipid Gene Database; Beisson)	YES	NO	NO	NO		p	envelope	C	11.1.8 lipid metabolism.FA synthesis and FA elongation.acyl coa ligase
	AT5G59250.1	sugar transporter family	YES	NO	NO	NO		p	envelope	C	34.2 transporter.sugars
	AT5G23890.1	expressed protein	YES	NO	NO	NO		p	envelope	C	35.1 not assigned.no ontology
	AT5G12470.1	expressed protein	YES	NO	NO	NO		p	envelope	C	35.2 not assigned.unknown
	AT1G65260.1	Vipp1 - mutant HCF155 - PspA like	YES	YES	NO	NO		p	envelope; plastid stroma; thylakoid-peripheral-stromal-side	C	29.3.3 protein.targeting.chloroplast
	AT2G20890.1	TF1 - thylakoid formation1	YES	YES	NO	NO		p	envelope; plastid stroma; thylakoid-peripheral-stromal-side	C	29.3.3 protein.targeting.chloroplast
	AT2G32480.1	membrane zinc metalloprotease (M50)	NO	NO	NO	NO	YES	p	envelope-inner	C	29.5.7 protein.degradation.metalloprotease
	AT2G33740.1	CUTA - copper chaperone	NO	NO	NO	NO	YES	p	envelope-inner	C	15.2 metal handling.binding, chelation and storage
	AT4G33650.1	dynamin ADL 2-envelope	NO	NO	NO	NO	YES	p	envelope-inner	C	26.17 misc.dynamin
	AT5G42480.1	Arc6 (AtFN2) DnaJ family	NO	NO	NO	NO	YES	p	envelope-inner	C	31.2.5 cell.division.plastid
	AT3G20320.1	phoshatidic acid-binding protein (TGD2)	NO	NO	NO	NO	YES	p	envelope-inner	C	11.1.31 lipid metabolism.FA synthesis and FA elongation.pyruvate DH
	AT4G31780.1	MGD1 - monogalactosyldiacylglycerol synthetase	NO	NO	NO	NO	YES	p	envelope-inner	C	11.10.1 lipid metabolism.glycolipid synthesis.MGDG synthase
	AT3G44880.1	Pheophorbide a oxygenase (PaO) or ACD1	NO	NO	NO	NO	YES	p	envelope-inner	C	19.50* tetrapyrrole degradation
	AT4G33520.1	PAA1 - copper transport envelope	NO	NO	NO	NO	YES	p	envelope-inner	C	34.12 transport.metal
	AT3G63410.1	vte3 - MPBQ/MSBQ methyl transferase (also APG1 or E37)	YES	NO	NO	NO		p	envelope-inner	C	16.1.3.3 secondary metabolism.isoprenoids.tocopherol biosynthesis.MPBQ/MSBQ methyltransferase
	AT2G38040.1	putative alpha-carboxyltransferase ;	YES	YES	NO	NO		p	envelope-inner	C	16.99 secondary metabolism.unspecified
	AT3G52170.1	PEND - PD2 - DNA binding - nucleoids (TAC)	NO	NO	NO	NO	YES	p	envelope-inner; plastid nucleoid	C	28.3* DNA.plastid nucleoid interacting
	AT1G69390.1	MinE	NO	NO	NO	NO	YES	p	envelope-inner; plastid stroma	C	31.2.5 cell.division.plastid
	AT5G24020.1	MinD	NO	NO	NO	NO	YES	p	envelope-inner; plastid stroma	C	31.2.5 cell.division.plastid
	AT1G44446.1	chlorophyll a oxygenase	NO	NO	NO	NO	YES	p	envelope-inner; thylakoid	C	19.16 tetrapyrrole synthesis.chlorophyll b synthase
	AT3G14110.1	Flu gene - TPR motif, regulation tetrapyrole biosynthesis	YES	NO	YES	NO		p	envelope-inner; thylakoid	C	19.4 tetrapyrrole synthesis.regulation
	AT2G29650.1	ANTR1 - anion transporter	NO	NO	NO	NO	YES	p	envelope-inner-integral	C	34.18 transport.unspecified anions
	AT4G00370.1	ANTR2 - anion transporter	NO	NO	NO	NO	YES	p	envelope-inner-integral	C	34.18 transport.unspecified anions
	AT4G03320.1	Tic20-IV	NO	NO	NO	NO	YES	p	envelope-inner-integral	C	29.3.3 protein.targeting.chloroplast
	AT4G30580.1	LPAAT (ACT2) = plastidial lysophosphatidic/ 1-acylglycerol-Phosphate Acyltransferase	NO	NO	NO	NO	YES	p	envelope-inner-integral	C	11.1 lipid metabolism.glycolipid synthesis
	AT5G05580.1	Plastidial Linoleate Desaturase (FAD7/FAD8) (Lipid Gene Database: Beisson)	NO	NO	NO	NO	YES	p	envelope-inner-integral	C	11.2.3 lipid metabolism.FA desaturation.omega 3 desaturase
	AT3G11170.1	Plastidial Linoleate Desaturase (FAD7/FAD8) (Lipid Gene Database: Beisson)	NO	NO	NO	NO	YES	p	envelope-inner-integral	C	11.2.3 lipid metabolism.FA desaturation.omega 3 desaturase
	AT4G30950.1	FD6C = omega-6 fatty acid desaturase 'chloroplast omega-6 fatty acid desaturase (fad6)	NO	NO	NO	NO	YES	p	envelope-inner-integral	C	11.2.4 lipid metabolism.FA desaturation.omega 6 desaturase
	AT5G16150.1	IEP62 (putative sugar transporter)	NO	NO	NO	NO	YES	p	envelope-inner-integral	C	34.8 transport.metabolite transporters at the envelope membrane
	AT5G62720.1	IEP18 unknown function	NO	NO	NO	NO	YES	p	envelope-inner-integral	C	35.1 not assigned.no ontology
	AT2G38550.1	putative non-green plastid inner envelope membrane protein	NO	NO	NO	NO	YES	p	envelope-inner-integral	C	35.2 not assigned.unknown
	AT1G80300.1	ATP/ADP translocator (AATP1 ort AtNTT1)	NO	NO	NO	NO	YES	p	envelope-inner-integral	C	34.8 transport.metabolite transporters at the envelope membrane
	AT2G15290.1	Tic21 (cia5) also named PIC1 - Fe transporter	YES	NO	NO	NO		p	envelope-inner-integral	C	34.12 transport.metal
	AT5G16620.1	Tic40 (PDE120 - PIGMENT DEFECTIVE EMBRYO)	NO	NO	YES	NO		p	envelope-inner-integral	C	29.3.3 protein.targeting.chloroplast
	AT5G33320.1	PPT - IEP33 = Phosphate/phosphoenolpyruvate translocator	YES	NO	NO	NO		p	envelope-inner-integral	C	34.8 transport.metabolite transporters at the envelope membrane
	AT1G06950.1	Tic110	YES	NO	NO	NO		p	envelope-inner-integral	C	29.3.3 protein.targeting.chloroplast
	AT1G32080.1	HP45 unknown function	YES	NO	NO	NO		p	envelope-inner-integral	C	35.1 not assigned.no ontology
	AT2G24820.1	Tic55 (putative Rieske iron-sulfur protein).	YES	NO	NO	NO		p	envelope-inner-integral	C	29.3.3 protein.targeting.chloroplast
	AT2G47840.1	IEP16 (low homology TIC20)	YES	NO	NO	NO		p	envelope-inner-integral	C	29.3.3 protein.targeting.chloroplast
	AT5G12860.1	IEP45 = 2-oxoglutarate/malate translocator	YES	NO	NO	NO		p	envelope-inner-integral	C	34.8 transport.metabolite transporters at the envelope membrane
	AT5G64290.1	2-oxoglutarate/malate translocator (DiT1).	YES	NO	NO	NO		p	envelope-inner-integral	C	34.8 transport.metabolite transporters at the envelope membrane
	AT1G03160.1	FZL - FZO-like dynamin	YES	NO	NO	NO		p	envelope-inner-integral; thylakoid-integral	C	26.17 misc.dynamin
	AT3G15690.1	biotin carboxylase (BC) - part of ACCase complex	NO	NO	NO	NO	YES	p	envelope-inner-peripheral-stromal-side	C	11.1.1 lipid metabolism.FA synthesis and FA elongation.Acetyl CoA Carboxylation
	AT5G15530.1	biotin carboxyl carrier protein BCCP-2 - part of ACCase complex	NO	NO	NO	NO	YES	p	envelope-inner-peripheral-stromal-side	C	11.1 lipid metabolism.FA synthesis and FA elongation
	AT2G21280.1	GC1 (Giant Chloroplast 1) - plastid division	NO	NO	NO	NO	YES	p	envelope-inner-peripheral-stromal-side	C	31.2.5 cell.division.plastid
	AT1G01090.1	Plastidial Pyruvate Dehydrogenase E1alpha subunit	YES	NO	NO	NO		p	envelope-inner-peripheral-stromal-side	C	11.1.31 lipid metabolism.FA synthesis and FA elongation.pyruvate DH
	AT5G35360.1	acetyl-CoA carboxylase	YES	YES	NO	NO		p	envelope-inner-peripheral-stromal-side	C	11.1.1 lipid metabolism.FA synthesis and FA elongation.Acetyl CoA Carboxylation
	AT1G34430.1	Plastidial Dihydrolipoamide Acetyltransferase, pyruvate DH complex	YES	NO	NO	NO		p	envelope-inner-peripheral-stromal-side	C	11.1.31 lipid metabolism.FA synthesis and FA elongation.pyruvate DH
	AT5G50920.1	ClpC1 (also named HSP93-V) - very similar to ClpC3	YES	YES	YES	NO		p	envelope-inner-peripheral-stromal-side; plastid stroma	C	29.5.5 protein.degradation.serine protease
	AT5G16390.1	biotin carboxyl carrier protein BCCP-1 - part of ACCase complex	YES	YES	NO	NO		p	envelope-inner-peripheral-stromal-side; plastid stroma	C	11.1.1 lipid metabolism.FA synthesis and FA elongation.Acetyl CoA Carboxylation
	AT3G56940.1	CHL27 or Crd1	YES	NO	NO	NO		p	envelope-inner-peripheral-stromal-side; thylakoid-peripheral-stromal-side	C	19.12 tetrapyrrole synthesis.magnesium-protoporphyrin IX monomethyl ester (oxidative) cyclase
	AT4G33350.1	Tic22	YES	NO	NO	NO		p	envelope-intermembranespace	C	29.3.3 protein.targeting.chloroplast
	AT2G43950.1	OEP37	NO	NO	NO	NO	YES	p	envelope-outer	C	35.2 not assigned.unknown
	AT1G77590.1	LACS9 - acyl-CoA synthetase -plastid	YES	NO	NO	NO		p	envelope-outer	C	11.1.9 lipid metabolism.FA synthesis and FA elongation.long chain fatty acid CoA ligase
	AT5G19620.1	Toc75-V- putative protein outer membrane protein (IAP75)	YES	NO	NO	NO		p	envelope-outer	C	29.3.3 protein.targeting.chloroplast
	AT3G46740.1	OEP75 (TOC75-III) = Chloroplast import-associated channel homolog	YES	NO	NO	NO		p	envelope-outer	C	29.3.3 protein.targeting.chloroplast
	AT1G13270.1	methionine aminopeptidase MAP1B	NO	NO	NO	NO	YES	pd	mitochondria; plastid	C	29.5.7 protein.degradation.metalloprotease
	AT3G05790.1	Lon4 protease - dual targeted chloroplast/mitochondria	NO	NO	NO	NO	YES	pd	mitochondria; plastid	C	29.5.5 protein.degradation.serine protease
	AT3G25740.1	methionine aminopeptidase - MAP1C	NO	NO	NO	NO	YES	pd	mitochondria; plastid	C	29.5.7 protein.degradation.metalloprotease
	AT5G15700.1	RpoTmp or RpoT-2; Nuclear-encoded RNA polymerase 2 (NEP)	NO	NO	NO	NO	YES	pd	mitochondria; plastid	C	27.2 RNA.transcription
	AT2G39290.1	Phosphatidylglycero-phosphate synthase 1 (PGP1)-dual targeted	NO	NO	NO	NO	YES	pd	mitochondria; plastid	C	11.3 lipid metabolism.Phospholipid synthesis; 11.1 lipid metabolism.glycolipid synthesis
	AT1G15390.1	peptide deformylase 1A (PDF1A)	YES	NO	NO	NO		pd	mitochondria; plastid	C	26.1 misc.misc2
	AT5G53170.1	FtsH11	YES	NO	NO	NO		pd	mitochondria; plastid	C	29.5.7 protein.degradation.metalloprotease
	AT1G49630.1	AtPrep2 - metalloprotease (dual targeted)	NO	NO	NO	NO	YES	pd	mitochondria; plastid stroma	C	29.5.7 protein.degradation.metalloprotease
	AT1G50200.1	Ala tRNA synthetases class II (A) (AlaRS-1) (dual targeted - cTP/mTP) (also cytosol)	NO	NO	NO	NO	YES	pd	mitochondria; plastid stroma	C	29.1.7 protein.aa activation.alanine-tRNA ligase
	AT2G04842.1	Thr-tRNA synthetase (ThrRS-2) (dual targeted - cTP/mTP)	YES	YES	NO	NO		pd	mitochondria; plastid stroma	C	29.1.3 protein.aa activation.threonine-tRNA ligase
	AT2G31170.1	Cys-tRNA synthetase class I (C) (dual targeted)	YES	NO	NO	NO		pd	mitochondria; plastid stroma	C	29.1.16 protein.aa activation.cysteine-tRNA ligase
	AT3G02660.1	tRNA synthetase class I (W and Y) (dual targeted- cTP/mTP)	YES	NO	NO	NO		pd	mitochondria; plastid stroma	C	29.1.1 protein.aa activation.tyrosine-tRNA ligase
	AT3G58140.1	Phe-tRNA synthetase (dual targeted - cTP/mTP)	YES	YES	NO	NO		pd	mitochondria; plastid stroma	C	29.1.20 protein.aa activation.phenylalanine-tRNA ligase
	AT4G17300.1	Asp-tRNA synthetase (dual targeted)	YES	YES	NO	NO		pd	mitochondria; plastid stroma	C	29.1.22 protein.aa activation.asparagine-tRNA ligase
	AT4G33760.1	tRNA synthetase class II (D, K and N) protein (dual targeted - cTP/mTP)	YES	YES	NO	NO		pd	mitochondria; plastid stroma	C	29.1.12 protein.aa activation.aspartate-tRNA ligase
	AT5G14660.1	peptide deformylase 1B (PDF1B)	YES	YES	NO	NO		pd	mitochondria; plastid stroma	C	29.4 protein.postranslational modification
	AT5G22800.1	Ala-tRNA synthetases (Ala-RS2) (dual targeted - cTP/mTP)	YES	YES	NO	NO		pd	mitochondria; plastid stroma	C	29.1.7 protein.aa activation.alanine-tRNA ligase
	AT4G37000.1	red chlorophyll catabolite reductase (RCCR) - also accelerated cell death 2 (ACD2)	YES	YES	NO	NO		pd	mitochondria; plastid stroma	C	19.50* tetrapyrrole degradation
	AT5G54770.1	THI1 -involved in thiamine synthesis (vitamine B) (ARA6)	YES	YES	NO	NO		pd	mitochondria; plastid stroma	C	18.2 Co-factor and vitamine metabolism.thiamine
	AT2G25840.1	Trp-tRNA synthetase (dual targeted - cTP/mTP)	YES	NO	NO	NO		pd	mitochondria; plastid stroma	C	29.1 protein.aa activation
	AT3G19170.1	AtPrep1 - (AtZnMP) metalloprotease dually targeted	YES	YES	NO	NO		pd	mitochondria; plastid stroma	C	29.5.7 protein.degradation.metalloprotease
	AT3G48110.1	Gly t-RNA synthetase (GlyRS-2) (EDD1)- EMBRYO-DEFECTIVE-DEVELOPMENT 1) (dual targeted - cTP/mTP)	YES	YES	NO	NO		pd	mitochondria; plastid stroma	C	29.1.14 protein.aa activation.glycine-tRNA ligase
	AT1G63940.1	monodehydroascorbate reductase (MDHAR)	YES	YES	NO	NO		pd	mitochondria; plastid stroma	C	21.2.1 redox.ascorbate and glutathione.ascorbate
	AT5G52520.1	tRNA synthetase class II (dual targeted- cTP/mTP)	YES	YES	NO	NO		pd	mitochondria; plastid stroma	C	29.1.40 protein.aa activation.bifunctional aminoacyl-tRNA synthetase
	AT3G55400.1	Met-tRNA synthetase / methionine--tRNA ligase / MetRS (dual targeted)	YES	NO	NO	NO		pd	mitochondria; plastid stroma	C	29.1.10 protein.aa activation.methionine-tRNA ligase
	AT4G08390.1	L-ascorbate peroxidase, stromal (sAPX)	YES	YES	NO	NO		pd	mitochondria; plastid stroma	C	21.2.1 redox.ascorbate and glutathione.ascorbate
	AT2G31270.1	AtCDT1a - interacts with ARC6	NO	NO	NO	NO	YES	pdn	nucleus; plastid	C	31.2.5 cell.division.plastid
	AT5G09790.1	ATXR5 - plastid and nucleus	NO	NO	NO	NO	YES	pdn	nucleus; plastid	C	28.1.5* DNA.synthesis/chromatin structure.synthesis
	AT1G08540.1	SIG2 sigma factor (Sig2)	NO	NO	NO	NO	YES	p	plastid	C	27.2 RNA.transcription
	AT1G23400.1	CAF2 - splice factor group II intron	NO	NO	NO	NO	YES	p	plastid	C	27.1.1 RNA.processing.splicing
	AT1G30100.1	11,12 (11',12') 9-cis-epoxycarotenoid dioxygenase, putative (NCED5)	NO	NO	NO	NO	YES	p	plastid	C	16.1.4 secondary metabolism.isoprenoids.carotenoids
	AT1G31170.1	sulfiredoxin (Srx)	NO	NO	NO	NO	YES	p	plastid	C	21 redox
	AT1G50170.1	sirohydrochlorin ferrochelase - SirB	NO	NO	NO	NO	YES	p	plastid	C	19.32 tetrapyrrole synthesis.sirohydrochlorin ferrochelatase
	AT1G52670.1	Biotin carboxyl carrier protein of acetyl-CoA carboxylase (BCCP)	NO	NO	NO	NO	YES	p	plastid	C	35.1 not assigned.no ontology
	AT1G68460.1	IPT1 -adenylate isopentenyltransferase	NO	NO	NO	NO	YES	p	plastid	C	17.4.1 hormone metabolism.cytokinin.synthesis-degradation
	AT1G68660.1	ClpS (formerly ClpT) - E. coli ClpS homologue	NO	NO	NO	NO	YES	p	plastid	C	29.5.5 protein.degradation.serine protease
	AT1G70200.1	RNA recognition motif (RRM) protein	NO	NO	NO	NO	YES	p	plastid	C	27.4 RNA.RNA binding
	AT2G18950.1	vte2 - homogentisate phytyltransferase (HPT1)	NO	NO	NO	NO	YES	p	plastid	C	16.1.3.2 secondary metabolism.isoprenoids.tocopherol biosynthesis.homogentisate phytyltransferase
	AT2G20020.1	CAF1 - splice factor group II intron	NO	NO	NO	NO	YES	p	plastid	C	27.1.1 RNA.processing.splicing
	AT2G23070.1	alpha casein kinase 2 (CK 2acp)	NO	NO	NO	NO	YES	p	plastid	C	29.4 protein.postranslational modification
	AT2G31400.1	GUN1 - PPR protein involved in plastid-nuclear signaling	NO	NO	NO	NO	YES	p	plastid	C	30 signalling; 26.33* misc. tetratricopeptide repeat (TPR) unknown function
	AT2G36990.1	SIG6 sigma factor (SigF)	NO	NO	NO	NO	YES	p	plastid	C	27.2 RNA.transcription
	AT2G44990.1	MAX3 - carotenoid cleavage dioxygenase (CCD7)	NO	NO	NO	NO	YES	p	plastid	C	16.1.4 secondary metabolism.isoprenoids.carotenoids
	AT3G08010.1	ATAB2 - RNA binding protein; activator translation (affects both photosystems)	NO	NO	NO	NO	YES	p	plastid	C	27.4 RNA.RNA binding
	AT3G14440.1	11,12 (11',12') 9-cis-epoxycarotenoid dioxygenase, putative (NCED3) (maize VP14 is likely orthologue)	NO	NO	NO	NO	YES	p	plastid	C	16.1.4 secondary metabolism.isoprenoids.carotenoids
	AT3G19160.1	IPT8	NO	NO	NO	NO	YES	p	plastid	C	17.4.1 hormone metabolism.cytokinin.synthesis-degradation
	AT3G23920.1	thioredoxin regulated beta-amylase 1 (TR-BAM1 or BMY7 )	NO	NO	NO	NO	YES	p	plastid	C	2.2.2.1 major CHO metabolism.degradation.starch.starch cleavage
	AT3G53920.1	SIG3 sigma factor (SigC)	NO	NO	NO	NO	YES	p	plastid	C	27.2 RNA.transcription
	AT3G54900.1	Glutaredoxin (formerly CAX-interacting protein 1; CAXIP1)	NO	NO	NO	NO	YES	p	plastid	C	21.5 redox.periredoxins
	AT3G56130.1	Biotin carboxyl carrier protein of acetyl-CoA carboxylase (BCCP)	NO	NO	NO	NO	YES	p	plastid	C	11.1.1 lipid metabolism.FA synthesis and FA elongation.Acetyl CoA Carboxylation
	AT4G25910.1	NFU3 - Fe-S assembly - scaffold	NO	NO	NO	NO	YES	p	plastid	C	29.8.1* protein assembly and cofactor ligation. Fe-S assembly
	AT4G32810.1	carotenoid cleavage dioxygenase (CCD8)	NO	NO	NO	NO	YES	p	plastid	C	16.1.4 secondary metabolism.isoprenoids.carotenoids
	AT4G34350.1	1-hydroxy-2-methyl-butenyl 4-diphosphate reductase (ISPH or CLB6)	NO	NO	NO	NO	YES	p	plastid	C	16.1.1.7 secondary metabolism.isoprenoids.non-mevalonate pathway.HDR
	AT5G02250.1	3'-5' exoribonuclease - RNR1 (this is not RIF10)	NO	NO	NO	NO	YES	p	plastid	C	27.1.19 RNA.processing.ribonucleases
	AT5G04490.1	Phytol kinase or VTE5	NO	NO	NO	NO	YES	p	plastid	C	19.50* tetrapyrrole degradation
	AT5G08415.1	lipoyl synthase -lip1 plastid	NO	NO	NO	NO	YES	p	plastid	C	18.11 Co-factor and vitamine metabolism.lipoic acid
	AT5G13730.1	SIG4 sigma factor (SigD)	NO	NO	NO	NO	YES	p	plastid	C	27.2 RNA.transcription
	AT5G14760.1	l-Asp oxidase (NAD biosynthesis)	NO	NO	NO	NO	YES	p	plastid	C	18.21* Co-factor and vitamine metabolism.NAD/NADP
	AT5G17790.1	variegated 3 - (var3) - interacts with NCED4/CCD4	NO	NO	NO	NO	YES	p	plastid	C	16.1.4 secondary metabolism.isoprenoids.carotenoids
	AT5G23020.1	methylthioalkylmalate synthase 3 (MAM3 also named MAML)	NO	NO	NO	NO	YES	p	plastid	C	13.1.4.4.1 amino acid metabolism.synthesis.branched chain group.leucine specific.2-isopropylmalate synthase
	AT5G24120.1	SIG5 sigma factor (SigE)	NO	NO	NO	NO	YES	p	plastid	C	27.2 RNA.transcription
	AT5G36170.1	peptide chain release factor, AtPRFB - HCF109	NO	NO	NO	NO	YES	p	plastid	C	29.2.5 protein.synthesis.release
	AT5G40160.1	EMBO506-plastid differentiation	NO	NO	NO	NO	YES	p	plastid	C	31.6* plastid differentiation
	AT5G45930.1	Mg-protoporphyrin IX chelatase - CHLI-2	NO	NO	NO	NO	YES	p	plastid	C	19.1 tetrapyrrole synthesis.magnesium chelatase
	AT5G50210.1	NadA -quinolate synthase (NAD biosynthesis) and also SufE3	NO	NO	NO	NO	YES	p	plastid	C	18.21* Co-factor and vitamine metabolism.NAD/NADP
	AT5G66055.1	AKRP-plastid differentiation	NO	NO	NO	NO	YES	p	plastid	C	31.6* plastid differentiation
	AT3G53130.1	lutein - LUT1 -cytochrome P450-type monooxygenase CYP91C1; alpha hydroxylase	NO	NO	NO	NO	YES	p	plastid	C	16.1.4 secondary metabolism.isoprenoids.carotenoids
	AT5G55710.1	expressed protein - Tic20-related	NO	NO	NO	NO	YES	p	plastid	C	35.2 not assigned.unknown
	AT3G27160.1	30S S21 ribosomal protein (GSH1)	NO	NO	NO	NO	YES	p	plastid	C	29.2.1.1 protein.synthesis.chloroplast/mito.plastid
	AT3G62910.1	(ribosome) peptide chain release factor, AtPRF1 (APG3)	NO	NO	NO	NO	YES	p	plastid	C	29.2.5 protein.synthesis.release
	AT2G24120.1	RpoTp or RpoT-3 -Nuclear-encoded RNA polymerase (NEP) also SCABRA3	NO	NO	NO	NO	YES	p	plastid	C	27.2 RNA.transcription
	AT5G43780.1	ATPsulfurylase-4 (APS4)	NO	NO	NO	NO	YES	p	plastid	C	14.1 S-assimilation.APS
	AT1G03310.1	isoamylase 2 (lSA2 or DBE1)	YES	NO	NO	NO		p	plastid	C	2.1.2.4 major CHO metabolism.synthesis.starch.debranching
	AT1G08520.1	Mg-protoporphyrin IX chelatase (CHLD)	YES	YES	NO	NO		p	plastid	C	19.1 tetrapyrrole synthesis.magnesium chelatase
	AT1G15710.1	prephenate dehydrogenase family protein	YES	NO	NO	NO		p	plastid	C	13.1.6.4.2 amino acid metabolism.synthesis.aromatic aa.tyrosine.prephenate dehydrogenase
	AT1G18640.1	3-phosphoserine phosphatase-1 (PSP-1)	YES	NO	NO	NO		p	plastid	C	13.1.5.1.3 amino acid metabolism.synthesis.serine-glycine-cysteine group.serine.phosphoserine phosphatase
	AT1G23180.1	armadillo/beta-catenin repeat family protein	YES	NO	NO	NO		p	plastid	C	35.1.3 not assigned.no ontology.armadillo/beta-catenin repeat family protein
	AT1G26220.1	GCN5-related N-acetyltransferase (GNAT)	YES	NO	NO	NO		p	plastid	C	26.24 misc.GCN5-related N-acetyltransferase
	AT1G26230.1	Cpn60-beta-4	YES	NO	NO	NO		p	plastid	C	29.6 protein.folding
	AT1G29700.1	similar to Zn-dependent hydrolases of the beta-lactamase fold	YES	NO	NO	NO		p	plastid	C	35.2 not assigned.unknown
	AT1G31800.1	cytochrome P450-type monooxygenase CYP97A3; beta hydroxylase	YES	NO	NO	NO		p	plastid	C	26.1 misc.cytochrome P450
	AT1G45230.1	defective chloroplasts and leaves protein-like (DCL-like)	YES	NO	NO	NO		p	plastid	C	33.99 development.unspecified
	AT1G53280.1	DJ-1/PfpI family	YES	NO	NO	NO		p	plastid	C	35.1 not assigned.no ontology
	AT1G53520.1	chalcone-flavanone isomerase-related	YES	NO	NO	NO		p	plastid	C	16.8.2 secondary metabolism.flavonoids.chalcones
	AT1G54350.1	ABC transporter family protein	YES	NO	NO	NO		p	plastid	C	34.16 transport.ABC transporters and multidrug resistance systems
	AT1G54630.1	acyl carrier protein 3, chloroplast (ACP-3)	YES	NO	NO	NO		p	plastid	C	11.1.12 lipid metabolism.FA synthesis and FA elongation.ACP protein
	AT1G57770.1	amine oxidase family, contains similarity to carotenoid isomerase (Lycopersicon esculentum) GI:19550437, phytoene dehydrogenase (PDH1)	YES	NO	NO	NO		p	plastid	C	16.1.4 secondary metabolism.isoprenoids.carotenoids
	AT1G70070.1	DEAD/DEAH box helicase	YES	NO	NO	NO		p	plastid	C	27.5* RNA. DEAD/DEAH BOX helicase
	AT1G74960.1	FAB1 (FATTY ACID BIOSYNTHESIS 1);beta-ketoacyl-ACP synthetase 2	YES	NO	NO	NO		p	plastid	C	11.1.3 lipid metabolism.FA synthesis and FA elongation.ketoacyl ACP synthase
	AT2G17265.1	homoserine kinase	YES	YES	NO	NO		p	plastid	C	13.1.3.6.1.4 amino acid metabolism.synthesis.aspartate family.misc.homoserine.homoserine kinase
	AT2G20690.1	riboflavin synthase alpha chain -related	YES	NO	NO	NO		p	plastid	C	18.3.2 Co-factor and vitamine metabolism.riboflavin.riboflavin synthase
	AT2G22250.1	aspartate aminotransferase	YES	NO	NO	NO		p	plastid	C	13.1.1.2.1 amino acid metabolism.synthesis.central amino acid metabolism.aspartate.aspartate aminotransferase
	AT2G26540.1	uroporphyrinogen-III synthase family protein (UROM)	YES	NO	NO	NO		p	plastid	C	19.6 tetrapyrrole synthesis.uroporphyrinogen III synthase
	AT2G26670.1	heme oxygenase 1 - HO1 (Hy1)	YES	YES	NO	NO		p	plastid	C	19.21 tetrapyrrole synthesis.heme oxygenase
	AT2G30170.1	expressed protein - protease phosphatase domain PP2C	YES	NO	NO	NO		p	plastid	C	35.2 not assigned.unknown
	AT2G37690.1	phosphoribosylaminoimidazole carboxylase	YES	NO	NO	NO		p	plastid	C	23.1.2.6 nucleotide metabolism.synthesis.purine.AIR carboxylase
	AT2G39930.1	isoamylase 1 (starch debranching enzyme) (AtlSA1)	YES	NO	NO	NO		p	plastid	C	2.1.2.4 major CHO metabolism.synthesis.starch.debranching
	AT3G06350.1	dehydroquinate dehydratase, putative / shikimate dehydrogenase	YES	NO	NO	NO		p	plastid	C	13.1.6.1.10 amino acid metabolism.synthesis.aromatic aa.chorismate.dehydroquinate/shikimate dehydrogenase
	AT3G10350.1	anion-transporting ATPase family protein,	YES	NO	NO	NO		p	plastid	C	34.18.1 transport.unspecified anions.arsenite-transporting ATPase
	AT3G17810.1	dihydropyrimidine dehydrogenase (DHODH); homologue of C reinhardtii Tba1; translation D1 proteins	YES	YES	NO	NO		p	plastid	C	23.2 nucleotide metabolism.degradation
	AT3G24190.1	ABC1 kinase - ABC1K5	YES	NO	NO	NO		p	plastid	C	26.56* misc.ABC1k family
	AT3G52155.1	expressed protein - Phosphoglycerate mutase domain	YES	NO	NO	NO		p	plastid	C	35.2 not assigned.unknown
	AT3G54210.1	ribosomal protein L17 family protein	YES	NO	NO	NO		p	plastid	C	29.2.1.1 protein.synthesis.chloroplast/mito.plastid
	AT3G57050.1	CYSTATHIONINE BETA-LYASE (CBL)	YES	NO	NO	NO		p	plastid	C	13.1.3.4.2 amino acid metabolism.synthesis.aspartate family.methionine.cystathionine beta-lyase
	AT3G59400.1	Porphyrin-binding protein enhances Mg-chelatase (GUN4)	YES	NO	NO	NO		p	plastid	C	19.4 tetrapyrrole synthesis.regulation
	AT4G01883.1	expressed protein, cyclase/dehydrase domain	YES	NO	NO	NO		p	plastid	C	35.2 not assigned.unknown
	AT4G03200.1	DUF255 motif and ATP/GTP-binding site motif A (P-loop)	YES	NO	NO	NO		p	plastid	C	35.2 not assigned.unknown
	AT4G04770.1	ATNAP1 or AtABC1, LAF6 - SufB-like (ABC/ATPase) - interacts with NAP7	YES	YES	NO	NO		p	plastid	C	14 S-assimilation
	AT4G19710.2	aspartate kinase/homoserine dehydrogenase (ak-hsdh) model.2 has higher score than model.1	YES	NO	NO	NO		p	plastid	C	13.1.3.6.1.10 amino acid metabolism.synthesis.aspartate family.misc.homoserine.bifunctional aspartate kinase/homoserine dehydrogenase
	AT4G20960.1	cytidine/deoxycytidylate deaminase, Riboflavin biosynthesis protein ribD	YES	NO	NO	NO		p	plastid	C	23.5.3 nucleotide metabolism.deoxynucleotide metabolism.cytosine deaminase
	AT4G26500.1	CpSufE or SufE1, interacts with cpNifS	YES	NO	NO	NO		p	plastid	C	14 S-assimilation
	AT4G29590.1	methyltransferase domain protein	YES	NO	NO	NO		p	plastid	C	29.4 protein.postranslational modification
	AT4G34740.1	ATASE2/ATD2 (GLN PHOSPHORIBOSYL PYROPHOSPHATE AMIDOTRANSFERASE 2)	YES	NO	NO	NO		p	plastid	C	23.1.2.1 nucleotide metabolism.synthesis.purine.amidophosphoribosyltransferase
	AT4G39120.1	Inositol monophosphatase-2	YES	NO	NO	NO		p	plastid	C	3.4.5 minor CHO metabolism.myo-inositol.inositol phosphatase
	AT5G11880.1	diaminopimelate decarboxylase, putative / DAP carboxylase	YES	NO	NO	NO		p	plastid	C	13.1.3.5.5 amino acid metabolism.synthesis.aspartate family.lysine.diaminopimelate decarboxylase
	AT5G14260.1	SET domain-containing protein, low similarity to ribulose-1,5-bisphosphate carboxylase/oxygenase small subunit N-methyltransferase I	YES	NO	NO	NO		p	plastid	C	27.3.69 RNA.regulation of transcription.SET-domain transcriptional regulator family
	AT5G19370.1	rhodanese-like domain-containing protein / PPIC-type PPIASE domain-containing protein,	YES	YES	NO	NO		p	plastid	C	26.23 misc.rhodanese
	AT5G54810.1	tryptophan synthase, beta subunit 1 (TSB1)	YES	NO	NO	NO		p	plastid	C	13.1.6.5.5 amino acid metabolism.synthesis.aromatic aa.tryptophan.tryptophan synthase
	AT5G63060.1	transporter	YES	NO	NO	NO		p	plastid	C	34.99 transport.misc
	AT5G64300.1	ATGCH (Arabidopsis thaliana GTP cyclohydrolase II); 3,4-dihydroxy-2-butanone-4-phosphate synthase/ GTP cyclohydrolase II	YES	NO	NO	NO		p	plastid	C	18.3.1 Co-factor and vitamine metabolism.riboflavin.GTP cyclohydrolase II
	AT5G64860.1	disproportionating enzyme 1 (DPE1) or D-enzyme	YES	NO	NO	NO		p	plastid	C	2.2.2.4 major CHO metabolism.degradation.starch.D enzyme
	AT5G35100.1	peptidyl-prolyl cis-trans isomerase cyclophilin-type family protein	YES	NO	NO	NO		p	plastid	C	29.6 protein.folding
	AT1G08640.1	DnaJ domain family	YES	NO	NO	NO		p	plastid	C	26.29* misc. DnaJ domain with unknown function
	AT1G16720.1	HCF173 - involved in translation of the D1 protein	YES	NO	NO	NO		p	plastid	C	29.2.99 protein.synthesis.misc
	AT3G04870.1	zeta-carotene desaturase (ZDS) [carotene 7\,8-desaturase]	YES	NO	NO	NO		p	plastid	C	16.1.4 secondary metabolism.isoprenoids.carotenoids
	AT3G16290.1	FtsH - new plastid member	YES	NO	NO	NO		p	plastid	C	29.5.7 protein.degradation.metalloprotease
	AT5G18660.1	3,8-divinyl protochlorophyllide a 8-vinyl reductase - DVR (PALE-GREEN AND CHLOROPHYLL B REDUCED 2)	YES	NO	NO	NO		p	plastid	C	19.13 tetrapyrrole synthesis.divinyl chlorophyllide-a 8-vinyl-reductase
	AT5G64940.1	ABC1 kinase family (ABC1K5)	YES	NO	NO	NO		p	plastid	C	26.56* misc.ABC1k family
	AT2G43630.1	expressed protein	YES	NO	NO	NO		p	plastid	C	35.2 not assigned.unknown
	AT5G35170.1	adenylate kinase	YES	NO	NO	NO		p	plastid	C	23.4.1 nucleotide metabolism.phosphotransfer and pyrophosphatases.adenylate kinase
	AT1G15980.1	glycosyl transferase domain	YES	NO	NO	NO		p	plastid	C	35.2 not assigned.unknown
	AT1G64770.1	expressed protein	YES	NO	NO	NO		p	plastid	C	35.2 not assigned.unknown
	AT1G73060.1	expressed protein	YES	YES	NO	NO		p	plastid	C	35.2 not assigned.unknown
	AT2G04039.1	expressed protein	YES	NO	NO	NO		p	plastid	C	35.2 not assigned.unknown
	AT2G21960.1	expressed protein	YES	NO	NO	NO		p	plastid	C	35.2 not assigned.unknown
	AT3G15840.1	PIFI (post-illumination chl fluorescence increase)	YES	NO	NO	NO		p	plastid	C	1.1.40 PS.lightreaction.cyclic electron flow-chlororespiration
	AT4G33500.1	protein phosphatase 2C-related / PP2C-related	YES	NO	NO	NO		p	plastid	C	29.4 protein.postranslational modification
	AT5G04360.1	pullulanase (PUL1) or limit dextrinase 1 (LDA1)	YES	NO	NO	NO		p	plastid	C	2.1.2.4 major CHO metabolism.synthesis.starch.debranching
	AT5G47870.1	expressed protein	YES	NO	NO	NO		p	plastid	C	35.2 not assigned.unknown
	AT5G58250.1	expressed protein	YES	NO	NO	NO		p	plastid	C	35.2 not assigned.unknown
	AT3G43520.1	expressed protein , glycine rich domain - thylakoid or envelope	YES	NO	NO	NO		p	plastid	C	35.1.40 not assigned.no ontology.glycine rich proteins
	AT4G16155.1	E3 - dihydrolipoamide dehydrogenase 2 (ptlpd2), plastid- subunit of pyruvate dehydrogenase complex	YES	NO	NO	NO		p	plastid	C	11.1.31 lipid metabolism.FA synthesis and FA elongation.pyruvate DH
	AT5G19940.1	fibrillin (FIB6)	YES	NO	NO	NO		p	plastid	C	26.31* misc. fibrillins
	AT3G25760.1	allene oxide cyclase family (ERD12-1)	YES	NO	NO	NO		p	plastid	C	17.7.1.3 hormone metabolism.jasmonate.synthesis-degradation.allene oxidase synthase
	AT3G26060.1	Peroxiredoxin Q (Prx Q) (monomeric)	YES	YES	NO	NO		p	plastid	C	21.5 redox.periredoxins
	AT4G25080.1	magnesium-protoporphyrin IX methyltransferase	YES	NO	NO	NO		p	plastid	C	19.11 tetrapyrrole synthesis.magnesium protoporphyrin IX methyltransferase
	AT3G25860.1	E2 - dihydrolipoamide acetyltransferase, plastid - subunit of pyruvate dehydrogenase complex	YES	NO	NO	NO		p	plastid	C	11.1.31 lipid metabolism.FA synthesis and FA elongation.pyruvate DH
	AT3G23700.1	S1 RNA-binding/ribosomal protein	YES	NO	NO	NO		p	plastid	C	35.1.14 not assigned.no ontology.S RNA-binding domain-containing protein
	AT1G72640.1	expressed protein	YES	NO	NO	NO		p	plastid	C	35.2 not assigned.unknown
	AT1G73110.1	activase -related	YES	NO	NO	NO		p	plastid	C	1.3.13 PS.calvin cyle.rubisco interacting
	AT1G75690.1	DnaJ domain family	YES	NO	NO	NO		p	plastid	C	26.29* misc. DnaJ domain with unknown function
	AT2G44050.1	6,7-dimethyl-8-ribityllumazine (DMRL) synthase (COS1) (vit B2 synthesis)	YES	NO	NO	NO		p	plastid	C	18.3.2 Co-factor and vitamine metabolism.riboflavin.riboflavin synthase
	AT3G55760.1	importin doman protein	YES	NO	NO	NO		p	plastid	C	35.2 not assigned.unknown
	AT2G22230.1	beta-hydroxyacyl-ACP dehydratase, plastid	YES	YES	NO	NO		p	plastid	C	11.1.5 lipid metabolism.FA synthesis and FA elongation.beta hydroxyacyl ACP dehydratase
	AT3G06730.1	thioredoxin family protein	YES	NO	NO	NO		p	plastid	C	21.1 redox.thioredoxin
	AT5G53460.1	NADH-GOGAT or NADH- glutamate synthase (GLT1)	YES	NO	NO	NO		p	plastid	C	12.2.1 N-metabolism.ammonia metabolism.glutamate synthase
	AT5G13630.1	Mg-protoporphyrin IX chelatase (CHLH) (GUN5) - also ABA receptor (17051210)	YES	YES	NO	NO		p	plastid	C	19.1 tetrapyrrole synthesis.magnesium chelatase
	AT3G10690.1	DNA gyrase subunit A family (TAC)	YES	NO	NO	NO		p	plastid	C	28.2 DNA.repair
	AT4G30920.1	leucyl aminopeptidase (LAP2)	YES	YES	NO	NO		p	plastid	C	29.5 protein.degradation
	AT1G71480.1	nuclear transport factor 2 (NTF2) family protein	NO	NO	YES	NO		p	plastid	C	29.3.1 protein.targeting.nucleus
	AT2G27290.1	expressed protein	YES	NO	YES	NO		p	plastid	C	35.2 not assigned.unknown
	AT1G48850.1	chorismate synthase	YES	NO	NO	NO		p	plastid	C	13.1.6.1.7 amino acid metabolism.synthesis.aromatic aa.chorismate.chorismate synthase
	AT4G10300.1	expressed protein (domains - cupin; DUF861)	YES	YES	NO	NO		p	plastid	C	35.2 not assigned.unknown
	AT5G66120.2	3-dehydroquinate synthase, putative - only model .2 has N-terminal cTP	YES	NO	NO	NO		p	plastid	C	13.1.6.1.2 amino acid metabolism.synthesis.aromatic aa.chorismate.3-dehydroquinate synthase; 18.5 Co-factor and vitamine metabolism.folate & vitamine K
	AT3G02630.1	acyl-[acyl-carrier-protein] desaturase-2 (stearoyl-ACP desaturase)	YES	NO	NO	NO		p	plastid	C	11.1.15 lipid metabolism.FA synthesis and FA elongation.ACP desaturase
	AT3G05625.1	expressed protein (TPR)	YES	NO	NO	NO		p	plastid	C	26.33* misc. tetratricopeptide repeat (TPR) unknown function
	AT3G04260.1	SAP domain-containing protein (pTAC3)	YES	NO	NO	NO		p	plastid	C	28.3* DNA.plastid nucleoid interacting
	AT5G23310.1	iron superoxide dismutase (FSD3)	YES	NO	NO	NO		p	plastid	C	21.6 redox.dismutases and catalases
	AT3G55250.1	expressed protein	YES	NO	NO	NO		p	plastid	C	35.2 not assigned.unknown
	AT4G34200.1	D-3-phosphoglycerate dehydrogenase (3-PGDH) - EDA9 (embryo sac development arrest 9) -very abundant	YES	YES	NO	NO		p	plastid	C	13.1.5.1.1 amino acid metabolism.synthesis.serine-glycine-cysteine group.serine.phosphoglycerate dehydrogenase
	AT1G21600.1	expressed protein (pTAC6)	NO	NO	NO	NO	YES	p	plastid nucleoid	C	28.3* DNA.plastid nucleoid interacting
	AT2G34640.1	expressed protein (pTAC12)	NO	NO	NO	NO	YES	p	plastid nucleoid	C	28.3* DNA.plastid nucleoid interacting
	AT3G16000.1	MFP1 - nucleoid binding	YES	NO	YES	NO		p	plastid nucleoid	C	28.3* DNA.plastid nucleoid interacting
	AT1G74850.1	pentatricopeptide (PPR) repeat (pTAC2)	YES	NO	NO	NO		p	plastid nucleoid	C	28.3* DNA.plastid nucleoid interacting
	AT2G02740.1	Why3 - DNA binding/transcription factor (p24 or Pbf-2) (pTAC11)	YES	NO	NO	NO		p	plastid nucleoid	C	27.3.82 RNA.regulation of transcription.plant TF (pbf2)
	AT3G27850.1	50S ribosomal protein L12-C (homologous to L12-A)	NO	NO	NO	NO	YES	p	plastid ribosome	C	29.2.1.1 protein.synthesis.chloroplast/mito.plastid
	AT2G24090.1	ribosomal protein L35 family protein	YES	NO	NO	NO		p	plastid ribosome	C	29.2.1.1 protein.synthesis.chloroplast/mito.plastid
	AT3G13120.1	30S ribosomal protein S10	YES	YES	NO	NO		p	plastid ribosome	C	29.2.1.1 protein.synthesis.chloroplast/mito.plastid
	AT5G54600.1	50S ribosomal protein L24, chloroplast (CL24)	YES	YES	NO	NO		p	plastid ribosome	C	29.2.1.1 protein.synthesis.chloroplast/mito.plastid
	AT1G78630.1	30S ribosomal protein S5	YES	YES	NO	NO		p	plastid ribosome	C	29.2.1.1 protein.synthesis.chloroplast/mito.plastid
	AT1G48350.1	50S ribosomal protein L18p	YES	NO	NO	NO		p	plastid ribosome	C	29.2.1.1 protein.synthesis.chloroplast/mito.plastid
	AT5G47190.1	50S ribosomal protein L19	YES	YES	NO	NO		p	plastid ribosome	C	29.2.1.1 protein.synthesis.chloroplast/mito.plastid
	AT1G75350.1	50S ribosomal protein L31 chloroplast	YES	YES	NO	NO		p	plastid ribosome	C	29.2.1.1 protein.synthesis.chloroplast/mito.plastid
	AT5G40950.1	50S ribosomal protein L27	YES	YES	NO	NO		p	plastid ribosome	C	29.2.1.1 protein.synthesis.chloroplast/mito.plastid
	AT5G14320.1	30S ribosomal protein S13	YES	YES	NO	NO		p	plastid ribosome	C	29.2.1.1 protein.synthesis.chloroplast/mito.plastid
	AT1G35680.1	50S ribosomal protein L21	YES	YES	NO	NO		p	plastid ribosome	C	29.2.1.1 protein.synthesis.chloroplast/mito.plastid
	AT1G74970.1	30S ribosomal protein S9	YES	YES	NO	NO		p	plastid ribosome	C	29.2.1.1 protein.synthesis.chloroplast/mito.plastid
	AT1G79850.1	30S ribosomal protein S17 chloroplast	YES	NO	NO	NO		p	plastid ribosome	C	29.2.1.1 protein.synthesis.chloroplast/mito.plastid
	AT1G05190.1	50S ribosomal protein L6p family	YES	YES	NO	NO		p	plastid ribosome	C	29.2.1.1 protein.synthesis.chloroplast/mito.plastid
	AT1G32990.1	50S ribosomal protein L11p	YES	YES	NO	NO		p	plastid ribosome	C	29.2.1.1 protein.synthesis.chloroplast/mito.plastid
	AT4G01310.1	50S ribosomal protein L5p family	YES	YES	NO	NO		p	plastid ribosome	C	29.2.1.1 protein.synthesis.chloroplast/mito.plastid
	AT5G65220.1	50S ribosomal protein L29p family	YES	YES	NO	NO		p	plastid ribosome	C	29.2.1.1 protein.synthesis.chloroplast/mito.plastid
	AT1G07320.1	50S ribosomal protein L4	YES	YES	NO	NO		p	plastid ribosome	C	29.2.1.1 protein.synthesis.chloroplast/mito.plastid
	AT3G63490.1	50S ribosomal protein L1p family	YES	YES	NO	NO		p	plastid ribosome	C	29.2.1.1 protein.synthesis.chloroplast/mito.plastid
	AT3G27830.1	50S ribosomal protein L12-A (homologous to L12-C)	YES	NO	NO	NO		p	plastid ribosome	C	29.2.1.1 protein.synthesis.chloroplast/mito.plastid
	AT1G64510.1	30S ribosomal protein S6 (changed at1g64500)	YES	NO	NO	NO		p	plastid ribosome	C	29.2.1.1 protein.synthesis.chloroplast/mito.plastid
	AT5G30510.1	30S ribosomal protein S1	YES	YES	NO	NO		p	plastid ribosome	C	29.2.1.1 protein.synthesis.chloroplast/mito.plastid
	AT2G43030.1	50S ribosomal protein L3	YES	YES	NO	NO		p	plastid ribosome	C	29.2.1.1 protein.synthesis.chloroplast/mito.plastid
	AT3G15190.1	30S ribosomal protein S20	YES	YES	NO	NO		p	plastid ribosome	C	29.2.1.1 protein.synthesis.chloroplast/mito.plastid
	AT3G25920.1	50S ribosomal protein L15	YES	YES	NO	NO		p	plastid ribosome	C	29.2.1.1 protein.synthesis.chloroplast/mito.plastid
	AT3G44890.1	50S ribosomal protein L9	YES	YES	NO	NO		p	plastid ribosome	C	29.2.1.1 protein.synthesis.chloroplast/mito.plastid
	AT5G13510.1	50S ribosomal protein L10	YES	YES	NO	NO		p	plastid ribosome	C	29.2.1.1 protein.synthesis.chloroplast/mito.plastid
	AT1G10500.1	cpIscA - 2Fe-2S assembly factor	NO	NO	NO	NO	YES	p	plastid stroma	C	29.8.1* protein assembly and cofactor ligation. Fe-S assembly
	AT1G32500.1	SufD (AtNap6) - ABC proteins - interacts with Nap7	NO	NO	NO	NO	YES	p	plastid stroma	C	14 S-assimilation
	AT1G75010.1	Arc3 - plastid division	NO	NO	NO	NO	YES	p	plastid stroma	C	31.2.5 cell.division.plastid
	AT2G41950.1	expressed protein	NO	NO	NO	NO	YES	p	plastid stroma	C	35.2 not assigned.unknown
	AT3G17040.1	HCF107 TPR - psbH expression (mbb1 homol, C. reinharditii.)	NO	NO	NO	NO	YES	p	plastid stroma	C	27.1 RNA.processing
	AT3G46790.1	CRR2 - RNA processing	NO	NO	NO	NO	YES	p	plastid stroma	C	27.1 RNA.processing
	AT3G56710.1	SibI - Sig1 interacting factor	NO	NO	NO	NO	YES	p	plastid stroma	C	27.2 RNA.transcription
	AT3G61080.1	ribulosamine/erythrulosamine3-kinase	NO	NO	NO	NO	YES	p	plastid stroma	C	29.4 protein.postranslational modification
	AT4G01940.1	CnfU-Ivb -2Fe-2S assembly PSI & Fd	NO	NO	NO	NO	YES	p	plastid stroma	C	29.8.1* protein assembly and cofactor ligation. Fe-S assembly
	AT4G27670.1	cpHSP21	NO	NO	NO	NO	YES	p	plastid stroma	C	29.6 protein.folding
	AT4G31850.1	PGR3-PPR motif-cytb6f complex	NO	NO	NO	NO	YES	p	plastid stroma	C	26.54* misc. Pentapeptide repeat (PPR) unknown function
	AT4G39040.1	RNA binding protein - CRS1/YhbY domain	NO	NO	NO	NO	YES	p	plastid stroma	C	27.4 RNA.RNA binding
	AT5G15760.1	PSRP-3B - associates with 30S	NO	NO	NO	NO	YES	p	plastid stroma	C	29.2.1.99 protein.synthesis.chloroplast/mito.unknown
	AT5G49940.1	CnfU-V - 2Fe-2S assembly PSI & Fd (also NFU-2)	NO	NO	NO	NO	YES	p	plastid stroma	C	29.8.1* protein assembly and cofactor ligation. Fe-S assembly
	AT4G30690.1	translation initiation factor 3 (IF-3) family protein	NO	NO	NO	NO	YES	p	plastid stroma	C	29.2.3 protein.synthesis.initiation
	AT1G14030.1	Rubisco LS methyltransferase (LSMT)	NO	NO	NO	NO	YES	p	plastid stroma	C	1.3.13 PS.calvin cyle.rubisco interacting
	AT4G21860.1	methionine sulfoxide reductase type B - 2 (MSRB2)	NO	NO	NO	NO	YES	p	plastid stroma	C	29.11* protein.methione sulfoxide reductases
	AT5G36790.1	2-phosphoglycolate phosphatase-2 (PGP-2)	NO	NO	NO	NO	YES	p	plastid stroma	C	1.2.1 PS.photorespiration.phosphoglycolate phosphatase
	AT1G06130.1	hydroxyacylglutathione hydrolase, putative / glyoxalase II	YES	NO	NO	NO		p	plastid stroma	C	13.2.3.2 amino acid metabolism.degradation.aspartate family.threonine; 24.1 Biodegradation of Xenobiotics.hydroxyacylglutathione hydrolase
	AT1G09795.1	ATP phosphoribosyl transferase (ATP-PRT2)	YES	NO	NO	NO		p	plastid stroma	C	13.1.7.1 amino acid metabolism.synthesis.histidine.ATP phosphoribosyl transferase
	AT1G11720.1	starch synthase type III	YES	NO	NO	NO		p	plastid stroma	C	2.1.2.2 major CHO metabolism.synthesis.starch.starch synthase
	AT1G12230.1	transaldolase	YES	NO	NO	NO		p	plastid stroma	C	7.2.2 OPP.non-reductive PP.transaldolase
	AT1G12800.1	S1 RNA-binding domain-containing protein	YES	NO	NO	NO		p	plastid stroma	C	27.3.23 RNA.regulation of transcription.HSF,Heat-shock transcription factor family
	AT1G17050.1	geranyl diphosphate synthase - GPPS or AtSPS2	YES	NO	NO	NO		p	plastid stroma	C	16.1.1 secondary metabolism.isoprenoids.non-mevalonate pathway
	AT1G17650.1	6-phosphogluconate dehydrogenase NAD-binding domain	YES	YES	NO	NO		p	plastid stroma	C	7.1.3 OPP.oxidative PP.6-phosphogluconate dehydrogenase
	AT1G17745.1	D-3-phosphoglycerate dehydrogenase (3-PGDH)	YES	YES	NO	NO		p	plastid stroma	C	13.1.5.1.1 amino acid metabolism.synthesis.serine-glycine-cysteine group.serine.phosphoglycerate dehydrogenase
	AT1G18500.1	2-isopropylmalate synthase (IMS1)	YES	NO	NO	NO		p	plastid stroma	C	13.1.4.4.1 amino acid metabolism.synthesis.branched chain group.leucine specific.2-isopropylmalate synthase
	AT1G31230.1	aspartate kinase/homoserine dehydrogenase (ak-hsdh)	YES	YES	NO	NO		p	plastid stroma	C	13.1.3.6.1.1 amino acid metabolism.synthesis.aspartate family.misc.homoserine.aspartate kinase
	AT1G43560.1	thioredoxin y2 (Trx Y2)	YES	YES	NO	NO		p	plastid stroma	C	21.1 redox.thioredoxin
	AT1G62640.1	3-oxoacyl-(acyl-carrier-protein) synthase III / 3-ketoacyl-acyl carrier protein synthase III (KAS III)	YES	NO	NO	NO		p	plastid stroma	C	11.1.3 lipid metabolism.FA synthesis and FA elongation.ketoacyl ACP synthase
	AT1G63970.1	2C-methyl-D-erythritol 2,4-cyclodiphosphate synthase (ispF);	YES	YES	NO	NO		p	plastid stroma	C	16.1.1.5 secondary metabolism.isoprenoids.non-mevalonate pathway.MCS
	AT1G79790.1	haloacid dehalogenase-like hydrolase family protein	YES	NO	NO	NO		p	plastid stroma	C	35.1 not assigned.no ontology
	AT2G03390.1	uvrB/uvrC motif-containing protein	YES	NO	NO	NO		p	plastid stroma	C	28.2 DNA.repair
	AT2G25830.1	YebC-related	YES	YES	NO	NO		p	plastid stroma	C	35.1 not assigned.no ontology
	AT2G29690.1	ASA2 (anthranilate synthase 2); anthranilate synthase	YES	NO	NO	NO		p	plastid stroma	C	13.1.6.5.1 amino acid metabolism.synthesis.aromatic aa.tryptophan.anthranilate synthase
	AT2G30695.1	similarity to Trigger factor	YES	NO	NO	NO		p	plastid stroma	C	35.2 not assigned.unknown
	AT2G33450.1	50S ribosomal protein L28, chloroplast (CL28)	YES	YES	NO	NO		p	plastid stroma	C	29.2.1.1 protein.synthesis.chloroplast/mito.plastid
	AT2G35450.1	expressed protein- domain Amidohydrolase 2 (InterPro:IPR006992)	YES	NO	NO	NO		p	plastid stroma	C	35.1 not assigned.no ontology
	AT2G35500.1	shikimate kinase-related	YES	NO	NO	NO		p	plastid stroma	C	13.1.6.1.5 amino acid metabolism.synthesis.aromatic aa.chorismate.shikimate kinase
	AT2G37240.1	expressed protein	YES	NO	NO	NO		p	plastid stroma	C	35.2 not assigned.unknown
	AT2G37500.1	glutamate/ornithine acetyltransferase -related	YES	YES	NO	NO		p	plastid stroma	C	13.1.2.3.2 amino acid metabolism.synthesis.glutamate family.arginine.acetylglutamate kinase
	AT2G38140.1	PSRP-4 associates with 30S	YES	NO	NO	NO		p	plastid stroma	C	29.2.1.99 protein.synthesis.chloroplast/mito.unknown
	AT2G38270.1	CAX-interacting protein, CAXIP1-like, glutaredoxin-related protein	YES	YES	NO	NO		p	plastid stroma	C	34.21 transport.calcium
	AT2G39080.1	expressed protein	YES	NO	NO	NO		p	plastid stroma	C	35.2 not assigned.unknown
	AT2G43945.1	expressed protein	YES	YES	NO	NO		p	plastid stroma	C	35.2 not assigned.unknown
	AT2G44040.1	dihydrodipicolinate reductase - very similar to AT3G59890	YES	NO	NO	NO		p	plastid stroma	C	13.1.3.5.2 amino acid metabolism.synthesis.aspartate family.lysine.dihydrodipicolinate reductase
	AT2G47940.1	DegP2 - HhoA homologue or DegQ	YES	YES	NO	NO		p	plastid stroma	C	29.5.5 protein.degradation.serine protease
	AT3G04550.1	expressed protein	YES	YES	NO	NO		p	plastid stroma	C	35.2 not assigned.unknown
	AT3G10670.1	AtNAP7 - ABC proteins - plastidic SufC-like - Fe-S cluster maintenance	YES	YES	NO	NO		p	plastid stroma	C	14 S-assimilation
	AT3G12930.1	Iojap-related	YES	NO	NO	NO		p	plastid stroma	C	35.2 not assigned.unknown
	AT3G24430.1	hcf101 - 2Fe-2S assembly PSI (also NFU-1)	YES	YES	NO	NO		p	plastid stroma	C	29.8 protein assembly and cofactor ligation
	AT3G26900.1	shikimate kinase family protein	YES	YES	NO	NO		p	plastid stroma	C	13.1.6.1.5 amino acid metabolism.synthesis.aromatic aa.chorismate.shikimate kinase
	AT3G44620.1	Low molecular weight phosphotyrosine protein phosphatase	YES	NO	NO	NO		p	plastid stroma	C	29.4 protein.postranslational modification
	AT3G47650.1	bundle-sheath defective protein 2 (bsd2) (DnaJ domain)	YES	NO	NO	NO		p	plastid stroma	C	33.99 development.unspecified
	AT3G48560.1	acetolactate synthase	YES	NO	NO	NO		p	plastid stroma	C	13.1.4.1 amino acid metabolism.synthesis.branched chain group.common
	AT3G49680.1	branched-chain-amino-acid transaminase (ATBCAT-3)	YES	NO	NO	NO		p	plastid stroma	C	13.1.4.1 amino acid metabolism.synthesis.branched chain group.common
	AT3G52180.1	protein tyrosine phosphatase, DSP4 (SEX4)	YES	NO	NO	NO		p	plastid stroma	C	2.2.2.2 major CHO metabolism.degradation.starch.starch phosphorylase
	AT3G53580.1	diaminopimelate epimerase family protein	YES	NO	NO	NO		p	plastid stroma	C	13.1.3.5.4 amino acid metabolism.synthesis.aspartate family.lysine.diaminopimelate epimerase
	AT3G55010.1	phosphoribosylformylglycinamidine cyclo-ligase, chloroplast / phosphoribosyl-aminoimidazole synthetase / AIR synthase (PUR5)	NO	YES	NO	NO		p	plastid stroma	C	23.1.2.5 nucleotide metabolism.synthesis.purine.AIR synthase
	AT3G57560.1	aspartate/glutamate/uridylate kinase	YES	YES	NO	NO		p	plastid stroma	C	13.1.2.3.2 amino acid metabolism.synthesis.glutamate family.arginine.acetylglutamate kinase; 23.4.99 nucleotide metabolism.phosphotransfer and pyrophosphatases.misc
	AT3G59870.1	expressed protein	YES	YES	NO	NO		p	plastid stroma	C	35.2 not assigned.unknown
	AT3G59980.1	t-RNA binding protein	YES	YES	NO	NO		p	plastid stroma	C	29.2.4 protein.synthesis.initiation
	AT4G00490.1	beta-amylase 2 (BAM2 or BMY9)	YES	YES	NO	NO		p	plastid stroma	C	2.2.2.1 major CHO metabolism.degradation.starch.starch cleavage
	AT4G00620.1	tetrahydrofolate dehydrogenase/cyclohydrolase; Methenyltetrahydrofolate cyclohydrolase	NO	YES	NO	NO		p	plastid stroma	C	25.5 C1-metabolism.Methylenetetrahydrofolate dehydrogenase & Methenyltetrahydrofolate cyclohydrolase
	AT4G01900.1	PII nitrogen sensing protein GLB I	YES	YES	NO	NO		p	plastid stroma	C	30.1 signalling.in sugar and nutrient physiology
	AT4G16390.1	RNA-binding protein P67; PPR protein	YES	NO	NO	NO		p	plastid stroma	C	27.4 RNA.RNA binding
	AT4G21210.1	expressed protein - DUF299 domain	YES	YES	NO	NO		p	plastid stroma	C	35.2 not assigned.unknown
	AT4G28706.1	pfkB-type carbohydrate kinase family protein	YES	NO	NO	NO		p	plastid stroma	C	3.5 minor CHO metabolism.others
	AT4G29670.1	thioredoxin family protein	NO	YES	NO	NO		p	plastid stroma	C	21.1 redox.thioredoxin
	AT4G30720.1	expressed protein - domain Pyridine nucleotide-disulphide oxidoreductase (homologue Synechocystis sp.PIR2:S76076 )	YES	NO	NO	NO		p	plastid stroma	C	35.2 not assigned.unknown
	AT4G36810.1	geranylgeranyl pyrophosphate synthase (GGPS1) / GGPP synthetase / farnesyltranstransferase	YES	NO	NO	NO		p	plastid stroma	C	16.1.1.10 secondary metabolism.isoprenoids.mevalonate pathway.geranylgeranyl pyrophosphate synthase
	AT4G36910.1	CBS domain-containing protein - LEJ2 (LOSS OF THE TIMING OF ET AND JA BIOSYNTHESIS 2)	YES	NO	NO	NO		p	plastid stroma	C	35.1 not assigned.no ontology
	AT4G38460.1	geranylgeranyl pyrophosphate synthase, putative / GGPP synthetase, putative / farnesyltranstransferase	YES	NO	NO	NO		p	plastid stroma	C	16.1.1.10 secondary metabolism.isoprenoids.mevalonate pathway.geranylgeranyl pyrophosphate synthase
	AT5G08410.1	ferredoxin-thioredoxin reductase (FTRAv2)	YES	YES	NO	NO		p	plastid stroma	C	21.1 redox.thioredoxin
	AT5G08650.1	Elongation factor Tu with GTP-binding domain LepA, putative	YES	YES	NO	NO		p	plastid stroma	C	29.2.4 protein.synthesis.elongation
	AT5G12040.1	carbon-nitrogen hydrolase family protein, similar to Nit protein 2	YES	NO	NO	NO		p	plastid stroma	C	35.1 not assigned.no ontology
	AT5G13030.1	expressed protein	YES	NO	NO	NO		p	plastid stroma	C	35.2 not assigned.unknown
	AT5G16400.1	thioredoxin f2 (Trx F2)	YES	NO	NO	NO		p	plastid stroma	C	21.1 redox.thioredoxin
	AT5G17560.1	BolA-like family protein	YES	NO	NO	NO		p	plastid stroma	C	35.1 not assigned.no ontology
	AT5G22510.1	alkaline/neutral invertase - Amylo-alpha-1,6-glucosidase	YES	NO	NO	NO		p	plastid stroma	C	2.2.1.3.1 major CHO metabolism.degradation.sucrose.invertases.neutral
	AT5G23440.1	ferredoxin-thioredoxin reductase -variable subunit (subunit A) (FTRv2)	NO	YES	NO	NO		p	plastid stroma	C	21.1 redox.thioredoxin
	AT5G24400.1	glucosamine/galactosamine-6-phosphate isomerase - EMB2024 (EMBRYO DEFECTIVE 2024)	YES	NO	NO	NO		p	plastid stroma	C	7.1.2 OPP.oxidative PP.6-phosphogluconolactonase
	AT5G35790.1	glucose-6-phosphate 1-dehydrogenase	YES	YES	NO	NO		p	plastid stroma	C	7.1.1 OPP.oxidative PP.G6PD
	AT5G51110.1	expressed protein	YES	YES	NO	NO		p	plastid stroma	C	35.2 not assigned.unknown
	AT5G52100.1	CRR1 - biogenesis/stabilization NDH complex	YES	NO	NO	NO		p	plastid stroma	C	29.8 protein assembly and cofactor ligation
	AT5G55280.1	plastid division protein FtsZ-1	YES	YES	NO	NO		p	plastid stroma	C	31.2.5 cell.division.plastid
	AT5G56500.2	Cpn60-beta-3 - model .2 has higher score than model .1	YES	NO	NO	NO		p	plastid stroma	C	29.6 protein.folding
	AT5G57850.1	aminotransferase class IV	YES	YES	NO	NO		p	plastid stroma	C	26.26.1 misc.aminotransferases.aminotransferase class IV family protein
	AT5G57960.1	GTP-binding family protein	YES	NO	NO	NO		p	plastid stroma	C	30.5 signalling.G-proteins
	AT5G65840.1	putative - alkyl hydroperoxide reductase and thiol-specific antioxidant	YES	YES	NO	NO		p	plastid stroma	C	21 redox
	AT2G04400.1	indole-3-glycerol phosphate synthase (IGPS)	YES	YES	NO	NO		p	plastid stroma	C	13.1.6.5.4 amino acid metabolism.synthesis.aromatic aa.tryptophan.indole-3-glycerol phosphate synthase
	AT3G53460.1	RNA binding protein CP29 A' (RNP29A')	YES	YES	NO	NO		p	plastid stroma	C	27.4 RNA.RNA binding
	AT3G63190.1	Putative ribosome recycling factor	YES	YES	NO	NO		p	plastid stroma	C	29.2.9* protein.synthesis.ribosome recycling
	AT1G17220.1	translation initiation factor IF-2	YES	YES	NO	NO		p	plastid stroma	C	29.2.3 protein.synthesis.initiation
	AT1G24360.1	Plastidial Ketoacyl-ACP Reductase	YES	YES	NO	NO		p	plastid stroma	C	11.1.4 lipid metabolism.FA synthesis and FA elongation.ACP oxoacyl reductase
	AT2G21385.1	expressed protein	YES	YES	NO	NO		p	plastid stroma	C	35.2 not assigned.unknown
	AT2G40300.1	Ferritin-4	YES	YES	NO	NO		p	plastid stroma	C	15.2 metal handling.binding, chelation and storage
	AT3G56090.1	Ferritin-3	NO	YES	NO	NO		p	plastid stroma	C	15.2 metal handling.binding, chelation and storage
	AT4G17560.1	50S ribosomal protein L19	YES	YES	NO	NO		p	plastid stroma	C	29.2.1.1 protein.synthesis.chloroplast/mito.plastid
	AT4G25050.1	acyl carrier protein, plastid	YES	NO	NO	NO		p	plastid stroma	C	11.1.12 lipid metabolism.FA synthesis and FA elongation.ACP protein
	AT5G17990.1	anthranilate phosphoribosyltransferase - TRP1 (TRYPTOPHAN BIOSYNTHESIS 1)	YES	YES	NO	NO		p	plastid stroma	C	13.1.6.5.2 amino acid metabolism.synthesis.aromatic aa.tryptophan.anthranilate phosphoribosyltransferase
	AT5G51070.1	ClpD (Erd1)	YES	NO	NO	NO		p	plastid stroma	C	29.5.5 protein.degradation.serine protease
	AT5G55220.1	Trigger Factor	YES	YES	NO	NO		p	plastid stroma	C	29.6 protein.folding
	AT2G37220.1	RNA binding protein CP29 B'	YES	YES	NO	NO		p	plastid stroma	C	27.4 RNA.RNA binding
	AT2G24020.1	expressed protein YbaB family (DUF149)	YES	YES	NO	NO		p	plastid stroma	C	35.2 not assigned.unknown
	AT1G80380.2	phosphoribulokinase-1 (PRK-1) - Model .2 is better than model .2	YES	YES	NO	NO		p	plastid stroma	C	1.3.12 PS.calvin cyle.PRK
	AT5G50250.1	31 kDa ribonucleoprotein (AtRBP33)	YES	YES	NO	NO		p	plastid stroma	C	27.4 RNA.RNA binding
	AT1G76080.1	thioredoxin (CDSP32)	YES	YES	NO	NO		p	plastid stroma	C	21.1 redox.thioredoxin
	AT1G16080.1	expressed protein	YES	YES	NO	NO		p	plastid stroma	C	35.2 not assigned.unknown
	AT2G27680.1	aldo/keto reductase family	YES	YES	NO	NO		p	plastid stroma	C	3.5 minor CHO metabolism.others
	AT2G42530.1	cold-regulated protein (cor15b)	NO	YES	NO	NO		p	plastid stroma	C	20.2.2 stress.abiotic.cold
	AT4G39970.1	haloacid dehalogenase-like hydrolase-3	YES	YES	NO	NO		p	plastid stroma	C	3.5 minor CHO metabolism.others
	AT5G46290.1	Ketoacyl-ACP Synthase I (Lipid Gene Database; Beisson)	YES	NO	NO	NO		p	plastid stroma	C	11.1.3 lipid metabolism.FA synthesis and FA elongation.ketoacyl ACP synthase
	AT1G15140.1	oxidoreductase NAD-binding domain-containing protein	YES	YES	NO	NO		p	plastid stroma	C	26.7 misc.oxidases - copper, flavone etc.
	AT5G08280.1	hydroxymethylbilane synthase (HEMC)	YES	YES	NO	NO		p	plastid stroma	C	19.5 tetrapyrrole synthesis.porphobilinogen deaminase
	AT1G04420.1	aldo/keto reductase family	YES	YES	NO	NO		p	plastid stroma	C	3.5 minor CHO metabolism.others
	AT2G40490.1	uroporphyrinogen decarboxylase (UPD)	YES	YES	NO	NO		p	plastid stroma	C	19.7 tetrapyrrole synthesis.uroporphyrinogen decarboxylase
	AT3G48420.1	haloacid dehalogenase-like hydrolase-2	YES	YES	NO	NO		p	plastid stroma	C	35.1 not assigned.no ontology
	AT5G63310.1	NDPK2-stromal	YES	YES	NO	NO		p	plastid stroma	C	23.4.10 nucleotide metabolism.phosphotransfer and pyrophosphatases.nucleoside diphosphate kinase
	AT5G19220.1	ADP-glucose pyrophosphorylase (ADG2) (APL1)	YES	YES	NO	NO		p	plastid stroma	C	2.1.2.1 major CHO metabolism.synthesis.starch.AGPase
	AT5G38420.1	Rubisco small subunit 2b (RBCS-2b)	NO	YES	NO	NO		p	plastid stroma	C	1.3.2 PS.calvin cyle.rubisco small subunit
	AT1G80560.1	3-isopropylmalate dehydrogenase-1	YES	YES	NO	NO		p	plastid stroma	C	13.1.4.4.3 amino acid metabolism.synthesis.branched chain group.leucine specific.3-isopropylmalate dehydrogenase
	AT5G61410.1	ribulose-5-phosphate-3-epimerase (RPE)	YES	YES	NO	NO		p	plastid stroma	C	1.3.11 PS.calvin cyle.RPE
	AT3G63170.1	expressed protein	YES	YES	NO	NO		p	plastid stroma	C	35.2 not assigned.unknown
	AT3G13470.1	Cpn60-beta-1	NO	YES	NO	NO		p	plastid stroma	C	29.6 protein.folding
	AT5G58330.1	malate dehydrogenase [NADP]	YES	YES	NO	NO		p	plastid stroma	C	8.2.99 TCA / org. transformation.other organic acid transformaitons.misc
	AT5G15450.1	ClpB3 -HSP100 family	YES	YES	NO	NO		p	plastid stroma	C	29.6 protein.folding
	AT5G01600.1	Ferritin-1	YES	YES	NO	NO		p	plastid stroma	C	15.2 metal handling.binding, chelation and storage
	AT4G18810.1	similar to UV-B and ozone similarly regulated protein 1 UOS1 (Pisum sativum)	YES	YES	NO	NO		p	plastid stroma	C	20.2.99 stress.abiotic.unspecified; 30.11 signalling.light
	AT1G09830.1	phosphoribosylamine--glycine ligase (PUR2)	YES	YES	NO	NO		p	plastid stroma	C	23.1.2.2 nucleotide metabolism.synthesis.purine.GAR Synthetase
	AT1G32900.1	starch synthase, putative	YES	NO	NO	NO		p	plastid stroma	C	2.1.2.2 major CHO metabolism.synthesis.starch.starch synthase
	AT2G41680.1	AtNTRC - NADPH reductase - oxidative stress defense	YES	NO	NO	NO		p	plastid stroma	C	21.1 redox.thioredoxin
	AT3G62410.1	CP12 domain-containing protein	YES	YES	NO	NO		p	plastid stroma	C	1.3 PS.calvin cyle
	AT4G04350.1	Leu-tRNA synthase (EMB2369 (EMBRYO DEFECTIVE 2369)	YES	NO	NO	NO		p	plastid stroma	C	29.1.4 protein.aa activation. leucine-tRNA ligase
	AT4G34120.1	CBS domain-containing protein - LEJ1 (LOSS OF THE TIMING OF ET AND JA BIOSYNTHESIS 1)	YES	YES	NO	NO		p	plastid stroma	C	35.1 not assigned.no ontology
	AT5G16715.1	Val-tRNA synthetase (ValRS-2)- EMB2247 (EMBRYO DEFECTIVE 2247)	YES	YES	NO	NO		p	plastid stroma	C	29.1.9 protein.aa activation. valine-tRNA ligase
	AT5G24490.1	PSRP-1 associates with 30S	YES	YES	NO	NO		p	plastid stroma	C	29.2.1.99 protein.synthesis.chloroplast/mito.unknown
	AT5G49030.1	Ile-tRNA synthetase class II - OVA2 (OVULE ABORTION 2)	YES	NO	NO	NO		p	plastid stroma	C	29.1.5 protein.aa activation.isoleucine-tRNA ligase
	AT5G63420.1	RNA-metabolising metallo-beta-lactamase	YES	YES	NO	NO		p	plastid stroma	C	23.2 nucleotide metabolism.degradation
	AT2G35410.1	putative RNA binding protein	YES	YES	NO	NO		p	plastid stroma	C	27.4 RNA.RNA binding
	AT3G52960.1	Peroxiredoxin IIE (PrxII E)	YES	YES	NO	NO		p	plastid stroma	C	21.5 redox.periredoxins
	AT3G60750.1	transketolase-1 (TKL-1)	YES	YES	NO	NO		p	plastid stroma	C	1.3.8 PS.calvin cyle.transketolase; 7.2.1 OPP.non-reductive PP.transketolase
	AT1G12900.1	glyceraldehyde-3-phosphate dehydrogenase A-2 (GAPA-2)	YES	YES	NO	NO		p	plastid stroma	C	1.3.4 PS.calvin cyle.GAP
	AT3G12780.1	phosphoglycerate kinase-1 (PGK-1)	YES	YES	NO	NO		p	plastid stroma	C	1.3.3 PS.calvin cyle.phosphoglycerate kinase; 4.1 glycolysis.phosphoglycerate kinase
	AT3G47520.1	malate dehydrogenase [NAD], plastidic	YES	YES	NO	NO		p	plastid stroma	C	8.2.99 TCA / org. transformation.other organic acid transformaitons.misc
	AT1G52510.1	hydrolase, alpha/beta fold family	YES	YES	NO	NO		p	plastid stroma	C	35.2 not assigned.unknown
	AT4G31530.1	expressed protein - dehydrogenase domain	YES	YES	NO	NO		p	plastid stroma	C	35.2 not assigned.unknown
	AT5G35970.1	Deadbox DNA helicase-related	YES	NO	NO	NO		p	plastid stroma	C	28.5* DNA. DEAD BOX helicase
	AT1G67090.1	Rubisco small subunit-4 (RBCS-4)	YES	YES	YES	NO		p	plastid stroma	C	1.3.2 PS.calvin cyle.rubisco small subunit
	AT3G62030.1	peptidylprolyl isomerase ROC4	YES	YES	NO	NO		p	plastid stroma	C	29.6 protein.folding
	AT2G05990.1	Enoyl-ACP reductase (MOD1 - (MOSAIC DEATH 1);	YES	YES	NO	NO		p	plastid stroma	C	11.1.6 lipid metabolism.FA synthesis and FA elongation.enoyl ACP reductase
	AT2G39730.1	Rubisco activase	YES	YES	YES	YES		p	plastid stroma	C	1.3.13 PS.calvin cyle.rubisco interacting
	AT4G20360.1	elongation factor Tu (EF-Tu-1), plastid	YES	YES	YES	NO		p	plastid stroma	C	29.2.4 protein.synthesis.elongation
	AT5G20720.1	Cpn21 (also Cpn20)	YES	YES	NO	NO		p	plastid stroma	C	29.6 protein.folding
	AT2G25080.1	glutathione peroxidase 2 (GPX2)	YES	YES	NO	NO		p	plastid stroma	C	21.2 redox.ascorbate and glutathione
	AT1G42970.1	glyceraldehyde-3-phosphate dehydrogenase B (GAPB)	YES	YES	NO	NO		p	plastid stroma	C	1.3.4 PS.calvin cyle.GAP
	AT1G55490.1	Cpn60-beta-2	YES	YES	NO	NO		p	plastid stroma	C	29.6 protein.folding
	AT5G38430.1	Rubisco small subunit 1b (RBCS-1b)	YES	YES	NO	NO		p	plastid stroma	C	1.3.2 PS.calvin cyle.rubisco small subunit
	AT1G01080.1	RNA-binding protein cp33	YES	NO	NO	NO		p	plastid stroma	C	27.4 RNA.RNA binding
	AT4G24280.1	cpHSP70-1 (DnaK homologue)	YES	YES	NO	NO		p	plastid stroma	C	29.6 protein.folding
	AT4G24770.1	RNA binding protein CP31	YES	YES	NO	NO		p	plastid stroma	C	27.4 RNA.RNA binding
	AT3G45140.1	lipoxygenase AtLOX2, plastid	YES	YES	YES	NO		p	plastid stroma	C	17.7.1.2 hormone metabolism.jasmonate.synthesis-degradation.lipoxygenase
	AT3G56910.1	PSRP-5 associates with 50S	NO	YES	NO	NO		p	plastid stroma	C	29.2.1.99 protein.synthesis.chloroplast/mito.unknown
	AT2G41220.1	ferredoxin-dependent glutamate synthase (glu2 or Fd-GOGAT 2)	YES	NO	NO	NO		p	plastid stroma	C	12.2.1 N-metabolism.ammonia metabolism.glutamate synthase
	AT2G47450.1	cpSRP43	YES	NO	NO	NO		p	plastid stroma	C	29.3.3 protein.targeting.chloroplast
	AT5G35630.1	glutamate-ammonia ligase (GS2), chloroplast	YES	YES	NO	NO		p	plastid stroma	C	12.2.2 N-metabolism.ammonia metabolism.glutamine synthase
	AT1G32060.1	phosphoribulokinase-2 (PRK-2)	YES	YES	NO	NO		p	plastid stroma	C	1.3.12 PS.calvin cyle.PRK
	AT1G11430.1	DAG protein -related	YES	YES	NO	NO		p	plastid stroma	C	31.6* plastid differentiation
	AT4G24620.1	glucose-6-phosphate isomerase	YES	YES	NO	NO		p	plastid stroma	C	4.3 glycolysis.G6PIsomerase
	AT5G60600.1	GcpE protein (CLB4)	YES	YES	NO	NO		p	plastid stroma	C	16.1.1.6 secondary metabolism.isoprenoids.non-mevalonate pathway.HDS
	AT5G04140.1	ferredoxin-dependent glutamate synthase/glu1/Fd-GOGAT 1	YES	YES	NO	NO		p	plastid stroma	C	12.2.1 N-metabolism.ammonia metabolism.glutamate synthase
	AT5G63570.1	glutamate-1-semialdehyde 2,1-aminomutase 1 (GSA 1)	YES	YES	NO	NO		p	plastid stroma	C	19.3 tetrapyrrole synthesis.GSA
	AT3G48730.1	glutamate-1-semialdehyde 2,1-aminomutase 2 (GSA 2)	YES	YES	NO	NO		p	plastid stroma	C	19.3 tetrapyrrole synthesis.GSA
	AT5G16710.1	dehydroascorbate reductase-2 (DHAR-2), plastid	YES	YES	NO	NO		p	plastid stroma	C	21.2.1 redox.ascorbate and glutathione.ascorbate
	AT3G55800.1	sedoheptulose-bisphosphatase (SBPase)	YES	YES	NO	NO		p	plastid stroma	C	1.3.9 PS.calvin cyle.seduheptulose bisphosphatase
	AT1G62750.1	elongation factor Tu-G (EF-G) (sco1)	YES	YES	NO	NO		p	plastid stroma	C	29.2.4 protein.synthesis.elongation
	AT5G49910.1	cpHSP70-2 (Dnak homologue)	YES	YES	NO	NO		p	plastid stroma	C	29.6 protein.folding
	AT4G31990.1	aspartate aminotransferase, chloroplast (transaminase A/AAT1/Asp5	YES	YES	NO	NO		p	plastid stroma	C	13.1.1.2.1 amino acid metabolism.synthesis.central amino acid metabolism.aspartate.aspartate aminotransferase
	AT3G63140.1	Rap41 or CSP41A	YES	YES	NO	NO		p	plastid stroma	C	27 RNA
	AT5G51820.1	plastid phosphoglucomutase (PGM1) (starch free mutant 1)	YES	YES	NO	NO		p	plastid stroma	C	4.2 glycolysis.PGM
	AT1G23740.1	oxidoreductase, zinc-binding dehydrogenase family	YES	YES	NO	NO		p	plastid stroma	C	26.7 misc.oxidases - copper, flavone etc.
	AT5G04590.1	sulphite reductase	YES	YES	NO	NO		p	plastid stroma	C	14.3 S-assimilation.sulfite redox
	AT4G29060.1	PSRP-7 - homologue of C. reinhardtii PETS	YES	YES	NO	NO		p	plastid stroma	C	29.2.1.99 protein.synthesis.chloroplast/mito.unknown
	AT2G28000.1	Cpn60-alpha-1	YES	YES	NO	NO		p	plastid stroma	C	29.6 protein.folding
	AT3G48870.1	ClpC2 (also named HSP93-III)	YES	NO	NO	NO		p	plastid stroma	C	29.5.5 protein.degradation.serine protease; 29.6 protein.folding
	AT1G10760.1	Sex1 - R1 protein - controls starch phosphorylation	YES	YES	NO	NO		p	plastid stroma	C	2.2.2.3 major CHO metabolism.degradation.starch.glucan water dikinase
	AT2G21170.1	triosephosphate isomerase-1 (TPI-1)	YES	YES	NO	NO		p	plastid stroma	C	1.3.5 PS.calvin cycle.TPI
	AT3G58610.1	ketol-acid reductoisomerase	YES	YES	NO	NO		p	plastid stroma	C	13.1.4.1 amino acid metabolism.synthesis.branched chain group.common
	AT2G04030.1	cpHSP90	YES	YES	NO	NO		p	plastid stroma	C	29.6 protein.folding
	AT2G43750.1	cysteine synthase	YES	YES	NO	NO		p	plastid stroma	C	13.1.5.3.1 amino acid metabolism.synthesis.serine-glycine-cysteine group.cysteine.OASTL
	AT2G33800.1	30S Ribosomal p S5 Isolog L13	YES	YES	NO	NO		p	plastid stroma	C	29.2.1.1 protein.synthesis.chloroplast/mito.plastid
	AT1G68590.1	PSRP-3A associates with 30S	NO	YES	NO	NO		p	plastid stroma	C	29.2.1.99 protein.synthesis.chloroplast/mito.unknown
	AT5G14910.1	expressed protein - heavy metal binding domain - also in CN-PAGE -stroma	YES	YES	NO	NO		p	plastid stroma	C	15.2 metal handling.binding, chelation and storage
	AT1G69830.1	alpha-amylase - AtAMY3	YES	YES	NO	NO		p	plastid stroma	C	2.2.2.1 major CHO metabolism.degradation.starch.starch cleavage
	AT2G36390.1	1,4-alpha-glucan branching enzyme SBEII (starch branching enzyme class II/sbe2-1)	YES	YES	NO	NO		p	plastid stroma	C	2.1.2.3 major CHO metabolism.synthesis.starch.starch branching
	AT4G20850.1	subtilase family protein, Tripeptidyl-peptidase (TTP2)	YES	NO	NO	NO		p	plastid stroma	C	29.5.1 protein.degradation.subtilases
	AT4G09040.1	RNA recognition motif (RRM) protein	YES	YES	NO	NO		p	plastid stroma	C	27.4 RNA.RNA binding
	AT4G24830.1	argininosuccinate synthase	YES	YES	NO	NO		p	plastid stroma	C	13.1.2.3.22 amino acid metabolism.synthesis.glutamate family.arginine.arginosuccinate synthase
	AT1G03475.1	coproporphyrinogen III oxidase	YES	YES	NO	NO		p	plastid stroma	C	19.8 tetrapyrrole synthesis.coproporphyrinogen III oxidase
	AT1G69740.1	porphobilinogen synthase-1 (delta-aminolevulinic acid dehydratase-1) (ALAD-1)	YES	YES	NO	NO		p	plastid stroma	C	19.4 tetrapyrrole synthesis.ALA dehydratase
	AT1G80600.1	acetylornithine transaminase/AOTA/ACOAT)	YES	YES	NO	NO		p	plastid stroma	C	13.1.2.3.4 amino acid metabolism.synthesis.glutamate family.arginine.acetylornithine aminotransferase
	AT3G03710.1	3'-5' exoribonuclease (RIF10 also named RNR1)	YES	YES	NO	NO		p	plastid stroma	C	27.1.19 RNA.processing.ribonucleases
	AT5G26570.1	phosphoglucan water dikinase (PWD)	YES	YES	NO	NO		p	plastid stroma	C	2.2.2.3 major CHO metabolism.degradation.starch.glucan water dikinase
	AT5G36700.1	2-phosphoglycolate phosphatase-1 (PGP-1)	YES	NO	NO	NO		p	plastid stroma	C	1.2.1 PS.photorespiration.phosphoglycolate phosphatase
	AT5G36880.1	acetyl-CoA synthetase (acetate-CoA ligase)	YES	YES	NO	NO		p	plastid stroma	C	11.1.8 lipid metabolism.FA synthesis and FA elongation.acyl coa ligase
	AT3G29320.1	starch phosphorylase-1	YES	YES	NO	NO		p	plastid stroma	C	2.2.2.2 major CHO metabolism.degradation.starch.starch phosphorylase
	AT5G38410.1	Rubisco small subunit 3b (RBCS-3B)	YES	NO	NO	NO		p	plastid stroma	C	1.3.2 PS.calvin cyle.rubisco small subunit
	AT2G47390.1	thylakoid associated glutamyl endopeptidase (cGEP) (AARE2,3)	YES	YES	NO	NO		p	plastid stroma	C	29.5.5 protein.degradation.serine protease
	AT3G23940.1	dihydroxyacid dehydratase	YES	YES	NO	NO		p	plastid stroma	C	35.1 not assigned.no ontology
	AT2G37660.1	3-beta-hydroxy-delta5-steroid dehydrogenase/epimerase domain	YES	YES	NO	NO		p	plastid stroma	C	35.2 not assigned.unknown
	AT1G29900.1	carbamoylphosphate synthetase	YES	YES	NO	NO		p	plastid stroma	C	13.1.2.3.11 amino acid metabolism.synthesis.glutamate family.arginine.carbamoyl-phosphate synthase; 23.1.1.1 nucleotide metabolism.synthesis.pyrimidine.carbamoyl phosphate synthetase
	AT3G22960.1	pyruvate kinase-1 (typically homotetramer)	YES	YES	NO	NO		p	plastid stroma	C	11.1.30 lipid metabolism.FA synthesis and FA elongation.pyruvate kinase
	AT4G23100.1	gamma-glutamylcysteine synthetase (GSH1)	YES	YES	NO	NO		p	plastid stroma	C	21.2.2 redox.ascorbate and glutathione.glutathione
	AT3G57610.1	adenylosuccinate synthetase (ADSS)	YES	YES	NO	NO		p	plastid stroma	C	23.1.2.20 nucleotide metabolism.synthesis.purine.adenyosuccinate synthase
	AT5G06290.1	2-Cys Peroxiredoxin B (Prx B)	YES	YES	NO	NO		p	plastid stroma	C	21.5 redox.periredoxins
	AT3G54050.1	fructose-bisphosphatase (FBPA)	YES	YES	NO	NO		p	plastid stroma	C	1.3.7 PS.calvin cyle.FBPase
	AT5G51100.1	iron superoxide dismutase	YES	YES	NO	NO		p	plastid stroma	C	21.6 redox.dismutases and catalases
	AT3G54660.1	gluthatione reductase,	YES	YES	NO	NO		p	plastid stroma	C	21.2.2 redox.ascorbate and glutathione.glutathione
	AT1G56190.1	phosphoglycerate kinase-1 (PGK-2)	YES	YES	NO	NO		p	plastid stroma	C	1.3.3 PS.calvin cyle.phosphoglycerate kinase; 4.1 glycolysis.phosphoglycerate kinase
	AT2G15620.1	nitrite reductase (ferredoxin)	YES	YES	NO	NO		p	plastid stroma	C	12.1.2 N-metabolism.nitrate metabolism.nitrite reductase
	AT2G05710.1	aconitate hydratase (citrate hydro-lyase/aconitase)	YES	YES	NO	NO		p	plastid stroma	C	8.2.3 TCA / org. transformation.other organic acid transformaitons.aconitase
	AT1G70820.1	phosphoglucomutase-2 (PGM-2)	YES	NO	NO	NO		p	plastid stroma	C	4.2 glycolysis.PGM
	AT5G04740.1	ACT domain-containing protein	YES	NO	NO	NO		p	plastid stroma	C	13 amino acid metabolism
	AT3G26650.1	glyceraldehyde 3-phosphate dehydrogenase A-1 (GAPA-1)	YES	YES	NO	NO		p	plastid stroma	C	1.3.4 PS.calvin cyle.GAP
	AT2G36250.1	FtsZ2.1 plastid division - tubulin motifs	YES	YES	NO	NO		p	plastid stroma	C	31.2.5 cell.division.plastid
	AT4G25130.1	methionine sulfoxide reductase type A 4 (MSRA4)	YES	NO	NO	NO		p	plastid stroma	C	29.11* protein.methione sulfoxide reductases
	AT5G03940.1	cpSRP54	yes	YES	NO	NO		p	plastid stroma	C	29.3.3 protein.targeting.chloroplast
	AT5G45170.1	lectin domain protein (CBBY-related)	YES	YES	NO	NO		p	plastid stroma	C	35.2 not assigned.unknown
	AT1G32200.1	glycerol-3-phosphate acyltransferase (ATS1)	YES	YES	NO	NO		p	plastid stroma	C	11.3.1 lipid metabolism.Phospholipid synthesis.1-acylglycerol-3-phosphate O-acyltransferase
	AT3G53900.1	uracil phosphoribosyltransferase, putative / UMP pyrophosphorylase, putative / UPRTase,	YES	YES	NO	NO		p	plastid stroma	C	23.3.1.3 nucleotide metabolism.salvage.phosphoribosyltransferases.upp
	AT4G26900.1	imidazole glycerol phosphate synthase hisHF, chloroplast / IGP synthase / ImGPP synthase / IGPS,	YES	YES	NO	NO		p	plastid stroma	C	35.1 not assigned.no ontology
	AT4G29840.1	threonine synthase, chloroplast - MTO2 (METHIONINE OVER-ACCUMULATOR)	YES	YES	NO	NO		p	plastid stroma	C	13.1.3.2.1 amino acid metabolism.synthesis.aspartate family.threonine.threonine synthase
	AT5G28500.1	expressed protein	YES	YES	NO	NO		p	plastid stroma	C	35.2 not assigned.unknown
	AT3G14930.1	uroporphyrinogen decarboxylase (UPD)	YES	YES	NO	NO		p	plastid stroma	C	19.7 tetrapyrrole synthesis.uroporphyrinogen decarboxylase
	AT3G52380.1	RNA-binding protein cp33	YES	YES	NO	NO		p	plastid stroma	C	27.4 RNA.RNA binding
	AT1G31190.1	Inositol monophophatase-1	YES	YES	NO	NO		p	plastid stroma	C	3.4.5 minor CHO metabolism.myo-inositol.inositol phosphatase
	AT1G35420.1	dienelactone hydrolase family	NO	YES	NO	NO		p	plastid stroma	C	35.2 not assigned.unknown
	AT1G36390.1	GrpE-2	YES	NO	NO	NO		p	plastid stroma	C	29.6 protein.folding
	AT1G50320.1	thioredoxin x (Trx X)	YES	YES	NO	NO		p	plastid stroma	C	21.1 redox.thioredoxin
	AT1G51100.1	expressed protein	YES	NO	NO	NO		p	plastid stroma	C	35.2 not assigned.unknown
	AT1G56050.1	GTP-binding protein; DUF933	YES	YES	NO	NO		p	plastid stroma	C	30.5 signalling.G-proteins
	AT1G56500.1	haloacid dehalogenase-like hydrolase-1	YES	NO	NO	NO		p	plastid stroma	C	3.2 minor CHO metabolism.trehalose
	AT1G62780.1	expressed protein (NIPSNAP domain)	YES	YES	NO	NO		p	plastid stroma	C	35.2 not assigned.unknown
	AT1G75330.1	ornithine carbamoyltransferase	YES	NO	NO	NO		p	plastid stroma	C	13.1.2.3.21 amino acid metabolism.synthesis.glutamate family.arginine.ornithine carbamoyltransferase
	AT1G77060.1	isocitrate lyase (strange in the plastid) similar to carboxyphosphonoenolpyruvate mutase	YES	YES	NO	NO		p	plastid stroma	C	6.9 gluconeogenese/ glyoxylate cycle.isocitrate lyase
	AT2G29630.1	thiamine biosynthesis (thiC family)	YES	NO	NO	NO		p	plastid stroma	C	18.2 Co-factor and vitamine metabolism.thiamine
	AT2G30200.1	malonyl-CoA:Acyl carrier protein transacylase	YES	YES	NO	NO		p	plastid stroma	C	11.1.2 lipid metabolism.FA synthesis and FA elongation.Acetyl CoA Transacylase
	AT2G44650.1	Cpn10-1	YES	YES	NO	NO		p	plastid stroma	C	29.6 protein.folding
	AT3G01510.1	phosphatase; starch binding?	YES	NO	NO	NO		p	plastid stroma	C	26.13 misc.acid and other phosphatases
	AT3G54640.1	tryptophan synthase, alpha subunit (TSA1)	YES	YES	NO	NO		p	plastid stroma	C	13.1.6.5.5 amino acid metabolism.synthesis.aromatic aa.tryptophan.tryptophan synthase
	AT4G09020.1	isoamylase 3 (ISA3)	YES	YES	NO	NO		p	plastid stroma	C	2.1.2.4 major CHO metabolism.synthesis.starch.debranching
	AT4G18440.1	adenylosuccinate lyase	YES	YES	NO	NO		p	plastid stroma	C	23.1.2.8 nucleotide metabolism.synthesis.purine.SAICAR lyase
	AT4G21445.1	expressed protein	YES	NO	NO	NO		p	plastid stroma	C	35.2 not assigned.unknown
	AT4G34090.1	expressed protein	YES	NO	NO	NO		p	plastid stroma	C	35.2 not assigned.unknown
	AT5G13650.1	elongation factor protein, typeA/bipA like	YES	YES	NO	NO		p	plastid stroma	C	29.2.4 protein.synthesis.elongation
	AT5G26742.1	DEAD box RNA helicase (RH3) - mRNA etiolated seedling	YES	YES	NO	NO		p	plastid stroma	C	27.5* RNA. DEAD/DEAH BOX helicase
	AT5G48220.1	indole-3-glycerol phosphate synthase (IGPS)	YES	YES	NO	NO		p	plastid stroma	C	13.1.6.5.4 amino acid metabolism.synthesis.aromatic aa.tryptophan.indole-3-glycerol phosphate synthase
	AT5G48960.1	similarity to 5'-nucleotidase	YES	YES	NO	NO		p	plastid stroma	C	23.2 nucleotide metabolism.degradation
	AT5G66090.1	UspA domain protein (stress)	YES	YES	NO	NO		p	plastid stroma	C	35.2 not assigned.unknown
	AT1G66430.1	pfkB family carbohydrate kinase	YES	YES	NO	NO		p	plastid stroma	C	2.2.1.1 major CHO metabolism.degradation.sucrose.fructokinase
	AT3G20330.1	chloroplast aspartate transcarbamylase / ATCase (PYRB)	YES	YES	NO	NO		p	plastid stroma	C	23.1.1.2 nucleotide metabolism.synthesis.pyrimidine.aspartate transcarbamoylase
	AT3G27740.1	carbamoyl phosphate synthetase small subunit	YES	NO	NO	NO		p	plastid stroma	C	13.1.2.3.11 amino acid metabolism.synthesis.glutamate family.arginine.carbamoyl-phosphate synthase; 23.1.1.1 nucleotide metabolism.synthesis.pyrimidine.carbamoyl phosphate synthetase
	AT5G65620.1	Zn oligopeptidase A (M3 family)	YES	YES	NO	NO		p	plastid stroma	C	29.5.7 protein.degradation.metalloprotease
	AT5G66530.1	aldose 1-epimerase	YES	YES	NO	NO		p	plastid stroma	C	3.5 minor CHO metabolism.others
	AT5G48300.1	ADP-glucose pyrophosphorylase - small subunit 1 (APS1)	YES	YES	NO	NO		p	plastid stroma	C	2.1.2.1 major CHO metabolism.synthesis.starch.AGPase
	AT1G21440.1	carboxyvinyl-carboxyphosphonate phosphorylmutase	YES	NO	NO	NO		p	plastid stroma	C	35.2 not assigned.unknown
	AT5G47840.1	adenylate kinase or ATP-AMP transphosphorylase	YES	YES	NO	NO		p	plastid stroma	C	23.4.1 nucleotide metabolism.phosphotransfer and pyrophosphatases.adenylate kinase
	AT5G63890.2	histidinol dehydrogenase (ATHDH) - model .1 has no N-terminal cTP - use model .2	YES	NO	NO	NO		p	plastid stroma	C	13.1.7.8 amino acid metabolism.synthesis.histidine.histidinol dehydrogenase
	AT2G43710.1	acyl-[acyl-carrier-protein] desaturase-1 (stearoyl-ACP desaturase)	YES	YES	NO	NO		p	plastid stroma	C	11.1.15 lipid metabolism.FA synthesis and FA elongation.ACP desaturase
	AT3G08740.1	elongation factor P (EF-P)	YES	YES	NO	NO		p	plastid stroma	C	29.2.4 protein.synthesis.elongation
	AT3G55040.1	gluthatione Transferase Lamda -2 (GSTL2) - chloroplast spinach	YES	YES	NO	NO		p	plastid stroma	C	26.9 misc.glutathione S transferases
	AT5G24300.1	starch synthase 1 (SS1)	YES	YES	NO	NO		p	plastid stroma	C	2.1.2.2 major CHO metabolism.synthesis.starch.starch synthase
	AT4G33680.1	aminotransferase, classes I and II - AGD2 (ABERRANT GROWTH AND DEATH 2)	YES	YES	NO	NO		p	plastid stroma	C	13.1.3.5.3 amino acid metabolism.synthesis.aspartate family.lysine.LL-diaminopimelic acid aminotransferase
	AT2G20270.1	glutaredoxin protein family	YES	YES	NO	NO		p	plastid stroma	C	21.4 redox.glutaredoxins
	AT4G18480.1	Mg-protoporphyrin IX chelatase- CHLI-1 (cs, ch42, non-gun phenotype)	YES	YES	NO	NO		p	plastid stroma	C	19.1 tetrapyrrole synthesis.magnesium chelatase
	AT3G22890.1	ATP sulfurylase (ATPS1)	YES	YES	NO	NO		p	plastid stroma	C	14.1 S-assimilation.APS
	AT2G43090.1	aconitase	YES	YES	NO	NO		p	plastid stroma	C	8.2.4 TCA / org. transformation.other organic acid transformaitons.aconitase
	AT5G52920.1	pyruvate kinase-2 (typically homotetramer)	YES	YES	NO	NO		p	plastid stroma	C	11.1.30 lipid metabolism.FA synthesis and FA elongation.pyruvate kinase
	AT5G17710.1	GrpE-1 (EMB1241 - EMBRYO DEFECTIVE 1241); adenyl-nucleotide exchange factor	YES	YES	NO	NO		p	plastid stroma	C	29.6 protein.folding
	AT2G35040.1	AICARFT/IMPCHase bienzyme family protein	YES	YES	NO	NO		p	plastid stroma	C	23.1.2.9 nucleotide metabolism.synthesis.purine.AICAR transformylase and IMP synthase
	AT1G80480.1	similar to PRLI-interacting factor L (pTAC17)	NO	YES	NO	NO		p	plastid stroma	C	28.3* DNA.plastid nucleoid interacting
	AT1G14410.1	DNA-binding protein (pTAC1) Why1 - DNA binding/transcription factor -p24 like	YES	NO	NO	NO		p	plastid stroma	C	27.3.67 RNA.regulation of transcription.putative transcription regulator
	AT5G62790.1	1-deoxy-D-xylulose 5-phosphate reductoisomerase (DXR)	YES	YES	NO	NO		p	plastid stroma	C	16.1.1.2 secondary metabolism.isoprenoids.non-mevalonate pathway.DXR
	AT1G63770.2	glycyl aminopeptidase (M1) (model .2 is better than model .1)	YES	YES	NO	NO		p	plastid stroma	C	29.5 protein.degradation
	AT1G13280.1	allene oxide cyclase family similar to ERD12	YES	NO	NO	NO		p	plastid stroma	C	17.7.1.4 hormone metabolism.jasmonate.synthesis-degradation.allene oxidase cyclase
	AT5G42390.1	stromal processing peptidase (SPP)	YES	NO	NO	NO		p	plastid stroma	C	29.9* protein.processing
	AT3G19480.1	D-3-phosphoglycerate dehydrogenase, putative / 3-PGDH	YES	YES	NO	NO		p	plastid stroma	C	13.1.5.1.1 amino acid metabolism.synthesis.serine-glycine-cysteine group.serine.phosphoglycerate dehydrogenase
	AT1G14810.1	aspartate-semialdehyde dehydrogenase	YES	YES	NO	NO		p	plastid stroma	C	13.1.3.6.1.2 amino acid metabolism.synthesis.aspartate family.misc.homoserine.aspartate semialdehyde dehydrogenase
	AT4G38970.1	fructose-bisphosphate aldolase-2 (SFBA-2)	YES	YES	NO	YES		p	plastid stroma; plastoglobules	C	1.3.6 PS.calvin cyle.aldolase
	AT2G21330.1	fructose-bisphosphate aldolase-1 (SFBA-1)	YES	YES	NO	YES		p	plastid stroma; plastoglobules	C	1.3.6 PS.calvin cyle.aldolase
	AT1G32220.1	flavin reductase-related (3Beta_HSD; Isoflavone_redu)	YES	YES	NO	YES		p	plastid stroma; plastoglobules	C	35.2 not assigned.unknown
	AT3G26580.1	TCP34 - TPR protein DNA interaction (TAC)	NO	NO	NO	NO	YES	p	plastid stroma; thylakoid	C	28.3* DNA.plastid nucleoid interacting
	AT1G02560.1	ClpP5	YES	YES	NO	NO		p	plastid stroma; thylakoid-inner-peripheral-stromal-side	C	29.5.5 protein.degradation.serine protease
	AT1G49970.1	ClpR1	YES	NO	NO	NO		p	plastid stroma; thylakoid-inner-peripheral-stromal-side	C	29.5.5 protein.degradation.serine protease
	AT1G16880.1	uridylyltransferase-related	YES	YES	NO	NO		p	plastid stroma; thylakoid-inner-peripheral-stromal-side	C	3.8.3 minor CHO metabolism.galactose.galactose-1-phosphate uridyl transferases
	AT1G60950.1	Fd2-leaf	NO	NO	NO	NO	YES	p	plastid stroma; thylakoid-peripheral-stromal-side	C	1.1.5.2 PS.lightreaction.other electron carrier (ox/red).ferredoxin
	AT1G67280.1	glyoxalase I -1, putative (lactoylglutathione lyase)	YES	YES	NO	NO		p	plastid stroma; thylakoid-peripheral-stromal-side	C	13.2.3.2 amino acid metabolism.degradation.aspartate family.threonine; 24.2 Biodegradation of Xenobiotics.lactoylglutathione lyase
	AT1G12410.1	ClpR2	YES	YES	NO	NO		p	plastid stroma; thylakoid-peripheral-stromal-side	C	29.5.5 protein.degradation.serine protease
	AT1G66670.1	ClpP3	YES	NO	NO	NO		p	plastid stroma; thylakoid-peripheral-stromal-side	C	29.5.5 protein.degradation.serine protease
	AT4G12060.1	ClpT2 (formerly ClpS2)	YES	YES	NO	NO		p	plastid stroma; thylakoid-peripheral-stromal-side	C	29.5.5 protein.degradation.serine protease
	AT4G17040.1	ClpR4	YES	YES	NO	NO		p	plastid stroma; thylakoid-peripheral-stromal-side	C	29.5.5 protein.degradation.serine protease
	AT5G09650.1	Inorganic phosphatase like	YES	YES	NO	NO		p	plastid stroma; thylakoid-peripheral-stromal-side	C	23.4.99 nucleotide metabolism.phosphotransfer and pyrophosphatases.misc
	AT1G09130.1	ClpR3	YES	YES	NO	NO		p	plastid stroma; thylakoid-peripheral-stromal-side	C	29.5.5 protein.degradation.serine protease
	AT2G28190.1	copper/zinc superoxide dismutase Cu,Zn-SOD (CSD2)	YES	YES	NO	NO		p	plastid stroma; thylakoid-peripheral-stromal-side	C	21.6 redox.dismutases and catalases
	AT4G01800.1	cpSecA	YES	YES	NO	NO		p	plastid stroma; thylakoid-peripheral-stromal-side	C	29.3.3 protein.targeting.chloroplast
	AT4G25370.1	ClpT1 (formerly ClpS1)	YES	YES	NO	NO		p	plastid stroma; thylakoid-peripheral-stromal-side	C	29.5.5 protein.degradation.serine protease
	AT3G11630.1	2-Cys Peroxiredoxin A (Prx A; formerly named BAS1)	YES	YES	NO	NO		p	plastid stroma; thylakoid-peripheral-stromal-side	C	21.5 redox.periredoxins
	AT5G45390.1	ClpP4	YES	YES	NO	NO		p	plastid stroma; thylakoid-peripheral-stromal-side	C	29.5.5 protein.degradation.serine protease
	AT1G11750.1	ClpP6	YES	YES	NO	NO		p	plastid stroma; thylakoid-peripheral-stromal-side	C	29.5.5 protein.degradation.serine protease
	AT3G15360.1	thioredoxin m4	YES	YES	NO	NO		p	plastid stroma; thylakoid-peripheral-stromal-side	C	21.1 redox.thioredoxin
	AT3G52150.1	PSRP-2 associates with 30S	YES	YES	NO	NO		p	plastid stroma; thylakoid-peripheral-stromal-side	C	29.2.1.99 protein.synthesis.chloroplast/mito.unknown
	AT3G04790.1	ribose 5-phosphate isomerase (PRI)	YES	YES	NO	NO		p	plastid stroma; thylakoid-peripheral-stromal-side	C	1.3.10 PS.calvin cyle.Rib5P Isomerase; 7.2.4 OPP.non-reductive PP.ribose 5-phosphate isomerase
	AT4G03520.1	thioredoxin m2	YES	YES	NO	NO		p	plastid stroma; thylakoid-peripheral-stromal-side	C	21.1 redox.thioredoxin
	AT3G20390.1	Endoribonuclease L-PSP	YES	YES	NO	NO		p	plastid stroma; thylakoid-peripheral-stromal-side	C	27.1 RNA.processing; 27.1.19 RNA.processing.ribonucleases
	AT2G21530.1	unknown protein, forkhead domain	YES	YES	YES	NO		p	plastid stroma; thylakoid-peripheral-stromal-side	C	35.1 not assigned.no ontology
	AT3G02730.1	thioredoxin f1 (Trx F1)	YES	YES	NO	NO		p	plastid stroma; thylakoid-peripheral-stromal-side	C	21.1 redox.thioredoxin
	AT2G31690.1	lipase class 3 family protein	NO	NO	NO	NO	YES	p	plastoglobules	C	11.9.2 lipid metabolism.lipid degradation.lipases
	AT4G00030.1	fibrillin (FIB9)	NO	NO	NO	NO	YES	p	plastoglobules	C	26.31* misc. fibrillins
	AT5G09820.1	fibrillin (FIB5)	NO	NO	NO	NO	YES	p	plastoglobules	C	26.31* misc. fibrillins
	AT1G06690.1	aldo/keto reductase family	YES	NO	NO	NO		p	plastoglobules	C	35.1 not assigned.no ontology
	AT2G34460.1	flavin reductase-related (3Beta_HSD;adh_short;DapB_N;GlutR_NAD_bind;Isoflavone_redu)	YES	NO	YES	YES		p	plastoglobules	C	35.1 not assigned.no ontology
	AT4G13200.1	expressed protein	YES	NO	YES	YES		p	plastoglobules	C	35.2 not assigned.unknown
	AT3G10130.1	SOUL heme-binding	NO	NO	NO	YES		p	plastoglobules	C	21.2 redox.heme
	AT4G19170.1	9-cis-epoxycarotenoid dioxygenase (CCD4 also NCED4)	YES	YES	NO	YES		p	plastoglobules	C	16.1.4 secondary metabolism.isoprenoids.carotenoids
	AT4G32770.1	tocopherol cyclase (vte1)	NO	NO	NO	YES		p	plastoglobules	C	16.1.3.4 secondary metabolism.isoprenoids.tocopherol biosynthesis.tocopherol cyclase
	AT2G01140.1	fructose-bisphosphate aldolase-3 (SFBA-3)	YES	YES	NO	NO		p	plastoglobules	C	1.3.6 PS.calvin cyle.aldolase
	AT1G54570.1	Diacyl glycerol transferase (DAGAT)	YES	NO	NO	YES		p	plastoglobules	C	11.1 lipid metabolism.glycolipid synthesis
	AT1G79600.1	ABC1 kinase - ABC1K2	YES	NO	NO	YES		p	plastoglobules	C	26.56* misc.ABC1k family
	AT2G41040.1	Ubie_methyl transferase - SAM-dependent methyltransferase	NO	NO	NO	YES		p	plastoglobules	C	35.1 not assigned.no ontology
	AT3G26840.1	Diacyl glycerol transferase (DAGAT)	NO	NO	NO	YES		p	plastoglobules	C	11.1 lipid metabolism.glycolipid synthesis
	AT5G08740.1	pyridine nucleotide-disulphide oxidoreductase (DhnA like)	YES	NO	NO	YES		p	plastoglobules	C	9.2.3 mitochondrial electron transport / ATP synthesis.NADH-DH.type II.mitochondrial
	AT1G26090.1	Anion-transporting ATPase	NO	NO	NO	YES		p	plastoglobules	C	34.18.1 transport.unspecified anions.arsenite-transporting ATPase
	AT1G71810.1	ABC1 kinase - ABC1K1	YES	NO	NO	NO		p	plastoglobules	C	26.56* misc.ABC1k family
	AT2G46910.1	fibrillin (FIB8)	NO	NO	NO	YES		p	plastoglobules	C	26.31* misc. fibrillins
	AT4G31390.1	ABC1 kinase - ABC1K3	YES	NO	NO	YES		p	plastoglobules	C	26.56* misc.ABC1k family
	AT3G58010.1	fibrillin FIB7a)	YES	YES	NO	YES		p	plastoglobules; thylakoid-peripheral-stromal-side	C	26.31* misc. fibrillins
	AT4G04020.1	fibrillin (FIB1a)	YES	YES	YES	YES		p	plastoglobules; thylakoid-peripheral-stromal-side	C	26.31* misc. fibrillins
	AT3G23400.1	fibrillin (FIB4)	YES	YES	YES	YES		p	plastoglobules; thylakoid-peripheral-stromal-side	C	26.31* misc. fibrillins
	AT4G22240.1	fibrillin (FIB1b)	YES	YES	YES	YES		p	plastoglobules; thylakoid-peripheral-stromal-side	C	26.31* misc. fibrillins
	AT5G42650.1	allene oxide synthase (AOS)	YES	NO	YES	YES		p	plastoglobules; thylakoid-peripheral-stromal-side	C	17.7.1.3 hormone metabolism.jasmonate.synthesis-degradation.allene oxidase synthase
	AT2G35490.1	fibrillin (FIB2)	YES	NO	YES	YES		p	plastoglobules; thylakoid-peripheral-stromal-side	C	26.31* misc. fibrillins
	AT2G01590.1	CRR3 - novel subunit NDH complex	NO	NO	NO	NO	YES	p	thylakoid	C	1.1.6 PS.lightreaction.NADH DH
	AT5G39210.1	CRR7- novel subunit NDH complex	NO	NO	NO	NO	YES	p	thylakoid	C	1.1.6 PS.lightreaction.NADH DH
	AT1G52220.1	expressed protein	NO	NO	NO	NO	YES	p	thylakoid	C	35.2 not assigned.unknown
	AT3G51510.1	expressed protein - C/M	NO	NO	NO	NO	YES	p	thylakoid	C	35.2 not assigned.unknown
	AT2G23670.1	expressed protein	NO	NO	NO	NO	YES	p	thylakoid	C	35.1 not assigned.no ontology
	AT2G36145.1	expressed protein	NO	NO	NO	NO	YES	p	thylakoid	C	35.2 not assigned.unknown
	AT3G26710.1	expressed protein	YES	NO	NO	NO		p	thylakoid	C	35.2 not assigned.unknown
	AT3G51820.1	chlorophyll synthase	YES	NO	NO	NO		p	thylakoid	C	19.15 tetrapyrrole synthesis.chlorophyll synthase
	AT5G48790.1	expressed protein	YES	NO	NO	NO		p	thylakoid	C	35.2 not assigned.unknown
	AT5G38520.1	hydrolase	YES	NO	NO	NO		p	thylakoid	C	35.1 not assigned.no ontology
	AT5G67030.1	zeaxanthin epoxidase precursor (LOS6/ABA1)(ZEP) - also envelope?	YES	YES	NO	NO		p	thylakoid	C	16.1.4 secondary metabolism.isoprenoids.carotenoids
	AT5G42765.1	Expressed protein - new lumenal protein?	YES	NO	NO	NO		p	thylakoid	C	35.2 not assigned.unknown
	AT1G73885.1	expressed protein	NO	NO	YES	NO		p	thylakoid	C	35.2 not assigned.unknown
	AT1G18060.1	expressed protein (fibrillin?)	YES	NO	NO	NO		p	thylakoid	C	35.2 not assigned.unknown
	AT1G42960.1	Hp17	YES	NO	NO	NO		p	thylakoid	C	35.2 not assigned.unknown
	AT5G58260.1	NDH N	YES	NO	NO	NO		p	thylakoid	C	1.1.6 PS.lightreaction.NADH DH
	AT1G71500.1	Rieske [2Fe-2S] domain	YES	NO	YES	NO		p	thylakoid	C	26.3 misc. other Ferredoxins and Rieske domain
	AT4G01050.1	expressed protein - Rhodanese-like domain	YES	NO	YES	NO		p	thylakoid	C	26.23 misc.rhodanese
	AT5G17170.1	expressed protein Rubredoxin and PDZ domain	YES	NO	YES	NO		p	thylakoid	C	29.8 protein assembly and cofactor ligation
	AT2G46820.1	Photosystem I protein - PSI-P (also pTAC8)	YES	NO	YES	NO		p	thylakoid	C	1.1.2.2 PS.lightreaction.photosystem I.PSI polypeptide subunits
	AT1G74470.1	geranylgeranyl reductase (GGDR)	YES	NO	YES	NO		p	thylakoid	C	16.1.1 secondary metabolism.isoprenoids.non-mevalonate pathway
	AT3G18890.1	UOS1 - extensin doman and dehydrogenase domain	YES	NO	YES	NO		p	thylakoid	C	20.2.5 stress.abiotic.light; 30.11 signalling.light
	AT3G46780.1	expressed protein (pTAC16)	YES	YES	YES	NO		p	thylakoid	C	28.3* DNA.plastid nucleoid interacting
	AT2G26340.1	expressed protein	YES	NO	NO	NO		p	thylakoid	C	35.2 not assigned.unknown
	AT5G08050.1	expressed protein	YES	NO	YES	NO		p	thylakoid	C	35.2 not assigned.unknown
	AT5G44650.1	expressed protein	YES	NO	YES	NO		p	thylakoid	C	35.2 not assigned.unknown
	AT2G42220.1	rhodanese-like domain protein	YES	NO	NO	NO		p	thylakoid	C	26.23 misc.rhodanese
	AT4G23890.1	expressed protein Synechocystis sp., PIR:S76577	YES	NO	NO	NO		p	thylakoid	C	35.2 not assigned.unknown
	AT4G27700.1	rhodanese-like domain protein; also AtStr14	YES	NO	YES	NO		p	thylakoid	C	26.23 misc.rhodanese
	AT5G03880.1	glutaredoxin	YES	NO	NO	NO		p	thylakoid	C	35.2 not assigned.unknown
	AT5G20140.1	SOUL heme-binding	YES	NO	YES	NO		p	thylakoid	C	21.3 redox.heme
	AT5G38660.1	expressed protein - (APE1) (ACCLIMATION OF PHOTOSYNTHESIS TO ENVIRONMENT)	YES	NO	NO	NO		p	thylakoid	C	35.2 not assigned.unknown
	AT4G35250.1	vestitone reductase-related	YES	NO	NO	NO		p	thylakoid	C	35.1 not assigned.no ontology
	AT1G74880.1	NDH O	NO	NO	YES	NO		p	thylakoid	C	1.1.6 PS.lightreaction.NADH DH
	AT1G78915.1	expressed protein	NO	NO	YES	NO		p	thylakoid	C	35.2 not assigned.unknown
	AT1G80030.1	DnaJ domain family	NO	NO	YES	NO		p	thylakoid	C	26.29* misc. DnaJ domain with unknown function
	AT2G17972.1	expressed protein	NO	NO	YES	NO		p	thylakoid	C	35.2 not assigned.unknown
	AT2G22360.1	DnaJ domain family	YES	NO	YES	NO		p	thylakoid	C	26.29* misc. DnaJ domain with unknown function
	AT3G09050.1	expressed protein	NO	NO	YES	NO		p	thylakoid	C	35.2 not assigned.unknown
	AT3G47860.1	apolipoprotein D-related	YES	NO	NO	NO		p	thylakoid	C	35.2 not assigned.unknown
	AT3G53470.1	expressed protein	NO	NO	YES	NO		p	thylakoid	C	35.1 not assigned.no ontology
	AT4G11960.1	expressed protein	NO	NO	YES	NO		p	thylakoid	C	35.2 not assigned.unknown
	AT4G38100.1	expressed protein	NO	NO	YES	NO		p	thylakoid	C	35.2 not assigned.unknown
	AT5G05740.1	EGY2, metalloprotease	YES	NO	NO	NO		p	thylakoid	C	29.5.7 protein.degradation.metalloprotease
	AT5G37360.1	expressed protein -	YES	NO	NO	NO		p	thylakoid	C	35.2 not assigned.unknown
	AT1G08380.1	psaO	NO	NO	NO	NO	YES	p	thylakoid-integral	C	1.1.2.2 PS.lightreaction.photosystem I.PSI polypeptide subunits
	AT1G19150.1	LHCI-1-2 - LHC-730	NO	NO	NO	NO	YES	p	thylakoid-integral	C	1.1.2.1 PS.lightreaction.photosystem I.LHC-I
	AT1G76570.1	putative lhcb3 or putative lhcb5	NO	NO	NO	NO	YES	p	thylakoid-integral	C	1.1.1.1 PS.lightreaction.photosystem II.LHC-II
	AT2G01110.1	TATC-like	NO	NO	NO	NO	YES	p	thylakoid-integral	C	29.3.3 protein.targeting.chloroplast
	AT3G21055.1	psbTn-1 - lTP	NO	NO	NO	NO	YES	p	thylakoid-integral	C	1.1.1.2 PS.lightreaction.photosystem II.PSII polypeptide subunits
	AT3G22840.1	Lil1.1 - Elip1	NO	NO	NO	NO	YES	p	thylakoid-integral	C	1.1.8* light stress chlorophyll binding
	AT4G14690.1	Lil1.2 - Elip2	NO	NO	NO	NO	YES	p	thylakoid-integral	C	1.1.8* light stress chlorophyll binding
	AT4G22260.1	IMMUTANS/alt oxidase	NO	NO	NO	NO	YES	p	thylakoid-integral	C	1.1.40 PS.lightreaction.cyclic electron flow-chlororespiration
	AT4G31560.1	HCF153 - biogenesis cytb6 complex	NO	NO	NO	NO	YES	p	thylakoid-integral	C	29.8 protein assembly and cofactor ligation
	AT4G34190.1	Sep1 or Lil4	NO	NO	NO	NO	YES	p	thylakoid-integral	C	1.1.8* light stress chlorophyll binding
	AT5G01920.1	Stt7-Att2 kinase state transition thylakoid	NO	NO	NO	NO	YES	p	thylakoid-integral	C	1.1.30 PS.lightreaction.state transition
	AT5G15250.1	FtsH6 (formerly pftp)	NO	NO	NO	NO	YES	p	thylakoid-integral	C	29.5.7 protein.degradation.metalloprotease
	AT5G21930.1	PAA2 - ATP -Copper transport - thyl	NO	NO	NO	NO	YES	p	thylakoid-integral	C	34.12 transport.metal
	AT5G35220.1	EGY1, thylakoid metalloprotease	NO	NO	NO	NO	YES	p	thylakoid-integral	C	29.5.7 protein.degradation.metalloprotease
	AT3G27690.1	LHCII-2.4	NO	NO	NO	NO	YES	p	thylakoid-integral	C	1.1.1.1 PS.lightreaction.photosystem II.LHC-II
	AT1G51400.1	psbTn-2	NO	NO	NO	NO	YES	p	thylakoid-integral	C	1.1.1.2 PS.lightreaction.photosystem II.PSII polypeptide subunits
	AT1G67740.1	psbY1+2	NO	NO	NO	NO	YES	p	thylakoid-integral	C	1.1.1.2 PS.lightreaction.photosystem II.PSII polypeptide subunits
	AT2G06520.1	psbX precursor 1 TM lTP but spontaneous	NO	NO	NO	NO	YES	p	thylakoid-integral	C	1.1.1.2 PS.lightreaction.photosystem II.PSII polypeptide subunits
	AT2G30570.1	psbW - 'LTP' but spontaneous	NO	NO	NO	NO	YES	p	thylakoid-integral	C	1.1.1.2 PS.lightreaction.photosystem II.PSII polypeptide subunits
	AT5G02120.1	Ohp1 or Lil2/Hlip/Scp	NO	NO	NO	NO	YES	p	thylakoid-integral	C	1.1.8* light stress chlorophyll binding
	AT1G29920.1	LHCII-1.2 - 100% identical to lhcb-1.1,3-mature	NO	NO	NO	NO	YES	p	thylakoid-integral	C	1.1.1.1 PS.lightreaction.photosystem II.LHC-II
	AT2G26500.1	petM - 4 kDa Tat ltp	NO	NO	NO	NO	YES	p	thylakoid-integral	C	1.1.3 PS.lightreaction.cytochrome b6/f
	AT2G28800.1	Alb3 (Albino 3)	NO	NO	NO	NO	YES	p	thylakoid-integral	C	29.3.3 protein.targeting.chloroplast
	AT1G02910.1	LPA1 - PSII assembly factor	YES	NO	NO	NO		p	thylakoid-integral	C	29.8 protein assembly and cofactor ligation
	AT1G68830.1	Stt7-At1 kinase state transition thylakoid	YES	NO	NO	NO		p	thylakoid-integral	C	1.1.30 PS.lightreaction.state transition
	AT2G18710.1	cpSecY	YES	NO	NO	NO		p	thylakoid-integral	C	29.3.3 protein.targeting.chloroplast
	AT5G51545.1	LPA2 - PSII assembly factor associates with ALB3	NO	NO	YES	NO		p	thylakoid-integral	C	35.2 not assigned.unknown
	AT5G28750.1	Tha4 TatA/E	NO	NO	YES	NO		p	thylakoid-integral	C	29.3.3 protein.targeting.chloroplast
	AT1G30380.1	psaK - subunit X	YES	NO	YES	NO		p	thylakoid-integral	C	1.1.2.2 PS.lightreaction.photosystem I.PSI polypeptide subunits
	AT2G34420.1	LHCII-1.5	YES	NO	YES	NO		p	thylakoid-integral	C	1.1.1.1 PS.lightreaction.photosystem II.LHC-II
	AT3G16140.1	psaH-1 - subunit VI	YES	NO	YES	NO		p	thylakoid-integral	C	1.1.2.2 PS.lightreaction.photosystem I.PSI polypeptide subunits
	AT1G50250.1	FtsH1	YES	NO	YES	NO		p	thylakoid-integral	C	29.5.7 protein.degradation.metalloprotease
	AT2G05070.1	LHCII-2.2	YES	NO	NO	NO		p	thylakoid-integral	C	1.1.1.1 PS.lightreaction.photosystem II.LHC-II
	AT2G05100.1	LHCII-2.1	YES	NO	NO	NO		p	thylakoid-integral	C	1.1.1.1 PS.lightreaction.photosystem II.LHC-II
	AT3G47470.1	LHCI-4 - LHCI-730	YES	NO	YES	YES		p	thylakoid-integral	C	1.1.2.1 PS.lightreaction.photosystem I.LHC-I
	AT3G54890.1	LHCI-1-1 - LHCI-730	YES	NO	YES	NO		p	thylakoid-integral	C	1.1.2.1 PS.lightreaction.photosystem I.LHC-I
	AT4G12800.1	psaL - subunit XI (also named V)	YES	NO	YES	NO		p	thylakoid-integral	C	1.1.2.2 PS.lightreaction.photosystem I.PSI polypeptide subunits
	AT2G30950.1	FtsH2 (VAR2 and Pftf)	YES	NO	YES	NO		p	thylakoid-integral	C	29.5.7 protein.degradation.metalloprotease
	AT1G55670.1	psaG - subunit V- stromal side	YES	NO	YES	NO		p	thylakoid-integral	C	1.1.2.2 PS.lightreaction.photosystem I.PSI polypeptide subunits
	AT2G34430.1	LHCII-1.4	YES	NO	NO	NO		p	thylakoid-integral	C	1.1.1.1 PS.lightreaction.photosystem II.LHC-II
	AT1G06430.1	FtsH8 TAT lTP	YES	NO	YES	NO		p	thylakoid-integral	C	29.5.7 protein.degradation.metalloprotease
	AT1G31330.1	psaF- subunit III - LTP - hydrophobic	YES	NO	YES	YES		p	thylakoid-integral	C	1.1.2.2 PS.lightreaction.photosystem I.PSI polypeptide subunits
	AT3G08940.2	LHCII-4.2 - CP29 - model .2 is better than model .1	YES	NO	YES	NO		p	thylakoid-integral	C	1.1.1.1 PS.lightreaction.photosystem II.LHC-II
	AT5G42270.1	FtsH5 (VAR1)	YES	NO	YES	NO		p	thylakoid-integral	C	29.5.7 protein.degradation.metalloprotease
	AT4G01150.1	expressed protein	YES	NO	YES	NO		p	thylakoid-integral	C	35.2 not assigned.unknown
	AT4G32260.1	CFO-II - atpG	YES	NO	YES	NO		p	thylakoid-integral	C	1.1.4 PS.lightreaction.ATP synthase
	AT1G29930.1	LHCII-1.3 - 100% identical to lhcb-1.1,2 -mature	YES	NO	YES	NO		p	thylakoid-integral	C	1.1.1.2 PS.lightreaction.photosystem II.PSII polypeptide subunits
	AT1G34000.1	Ohp2	YES	NO	YES	NO		p	thylakoid-integral	C	1.1.8* light stress chlorophyll binding
	AT1G44575.1	psbS (NPQ4 - null mutant)	YES	NO	YES	NO		p	thylakoid-integral	C	1.1.1.2 PS.lightreaction.photosystem II.PSII polypeptide subunits
	AT1G52230.1	psaH-2 - subunit VI	YES	NO	YES	NO		p	thylakoid-integral	C	1.1.2.2 PS.lightreaction.photosystem I.PSI polypeptide subunits
	AT1G54500.1	rubredoxin (RubA)	YES	NO	YES	NO		p	thylakoid-integral	C	29.8 protein assembly and cofactor ligation
	AT2G40100.1	LHCII-4.3 -CP29	YES	NO	NO	NO		p	thylakoid-integral	C	1.1.1.1 PS.lightreaction.photosystem II.LHC-II
	AT3G61470.1	LHCI-2.1 - LHCI-680B	YES	NO	YES	NO		p	thylakoid-integral	C	1.1.2.1 PS.lightreaction.photosystem I.LHC-I
	AT4G10340.1	LHCII-5 - CP26	YES	NO	YES	NO		p	thylakoid-integral	C	1.1.1.1 PS.lightreaction.photosystem II.LHC-II
	AT4G14870.1	cpSecE	NO	NO	YES	NO		p	thylakoid-integral	C	29.3.3 protein.targeting.chloroplast
	AT4G22890.1	expressed protein TPP/C/M	YES	NO	YES	NO		p	thylakoid-integral	C	35.2 not assigned.unknown
	AT5G01530.1	LHCII-4.1-CP29	YES	NO	YES	NO		p	thylakoid-integral	C	1.1.1.1 PS.lightreaction.photosystem II.LHC-II
	AT5G54270.1	LHCII-3	YES	NO	YES	NO		p	thylakoid-integral	C	1.1.1.1 PS.lightreaction.photosystem II.LHC-II
	AT1G61520.1	LHCI-3 - LHCI-680A CAB4	YES	NO	YES	NO		p	thylakoid-integral	C	1.1.2.1 PS.lightreaction.photosystem I.LHC-I
	AT1G79040.1	psbR	NO	NO	YES	NO		p	thylakoid-integral	C	1.1.1.2 PS.lightreaction.photosystem II.PSII polypeptide subunits
	AT1G29910.1	LHCII-1.1 - 100% identical to lhcb-1.2,3-mature	YES	NO	NO	NO		p	thylakoid-integral	C	1.1.1.1 PS.lightreaction.photosystem II.LHC-II
	AT1G14345.1	expressed protein	YES	NO	YES	NO		p	thylakoid-integral	C	35.2 not assigned.unknown
	AT1G77490.1	thylakoid bound APX	YES	NO	YES	NO		p	thylakoid-integral	C	21.2.1 redox.ascorbate and glutathione.ascorbate
	AT5G52440.1	hcf106 TatB	NO	NO	YES	NO		p	thylakoid-integral	C	29.3.3 protein.targeting.chloroplast
	AT1G73990.1	SppA	YES	NO	NO	NO		p	thylakoid-integral	C	29.5 protein.degradation
	AT5G23060.1	expressed protein - C/M	YES	NO	YES	NO		p	thylakoid-integral	C	35.2 not assigned.unknown
	AT1G22700.1	Pyg7 - TPR protein - PSI assembly (homologue YCF37 Synechocystis)	YES	NO	NO	NO		p	thylakoid-integral	C	29.8 protein assembly and cofactor ligation
	AT4G17600.1	Lil3.2	YES	NO	YES	NO		p	thylakoid-integral	C	1.1.8* light stress chlorophyll binding
	AT5G21430.1	DnaJ domain family	YES	NO	YES	NO		p	thylakoid-integral	C	26.29* misc. DnaJ domain with unknown function
	AT5G47110.1	Lil3.1	YES	NO	YES	NO		p	thylakoid-integral	C	1.1.8* light stress chlorophyll binding
	AT3G57680.1	CtpA-3	NO	NO	NO	NO	YES	p	thylakoid-peripheral-lumenal-side	C	29.9* protein. processing
	AT5G45040.1	cytochrome c6	NO	NO	NO	NO	YES	p	thylakoid-peripheral-lumenal-side	C	1.1.5 PS.lightreaction.other electron carrier (ox/red)
	AT5G39830.1	DegP8 - HhoA homologue or DegQ	NO	NO	NO	NO	YES	p	thylakoid-peripheral-lumenal-side	C	29.5.5 protein.degradation.serine protease
	AT5G46390.1	CtpA-2 - (also CtpC) barley - Pakrashi	NO	NO	NO	NO	YES	p	thylakoid-peripheral-lumenal-side	C	29.9* protein. processing
	AT4G17740.1	CtpA-1 - Satoh - spinach	NO	NO	NO	NO	YES	p	thylakoid-peripheral-lumenal-side	C	29.9* protein. processing
	AT4G28660.1	psbW -like sequencing project	NO	NO	NO	NO	YES	p	thylakoid-peripheral-lumenal-side	C	1.1.1.2 PS.lightreaction.photosystem II.PSII polypeptide subunits
	AT4G18370.1	DegP5 - HhoA homologue or DegQ	NO	NO	NO	NO	YES	p	thylakoid-peripheral-lumenal-side	C	29.5.5 protein.degradation.serine protease
	AT1G76100.1	PC-2	YES	NO	NO	NO		p	thylakoid-peripheral-lumenal-side	C	1.1.5.1 PS.lightreaction.other electron carrier (ox/red).plastocyanin
	AT2G43560.1	FKBP-type peptidyl-prolyl cis-trans isomerase	YES	YES	NO	NO		p	thylakoid-peripheral-lumenal-side	C	29.6 protein.folding
	AT5G11450.1	OEC23-like-6 Tat lTP TP21.5	YES	NO	NO	NO		p	thylakoid-peripheral-lumenal-side	C	1.1.1.2 PS.lightreaction.photosystem II.PSII polypeptide subunits
	AT5G45680.1	AtFKBP13 - lTP-TAT (involved with Rieske)	YES	NO	NO	NO		p	thylakoid-peripheral-lumenal-side	C	29.8 protein assembly and cofactor ligation
	AT1G20810.1	Isomerases - lumen	YES	NO	NO	NO		p	thylakoid-peripheral-lumenal-side	C	29.6 protein.folding
	AT3G01440.1	PsbQ domain Tat lTP	NO	NO	YES	NO		p	thylakoid-peripheral-lumenal-side	C	1.1.1.2 PS.lightreaction.photosystem II.PSII polypeptide subunits
	AT2G28605.1	PsbP domain - OEC23-like	YES	NO	NO	NO		p	thylakoid-peripheral-lumenal-side	C	1.1.1.2 PS.lightreaction.photosystem II.PSII polypeptide subunits
	AT1G20340.1	plastocyanin-1 (PC-1)	YES	YES	NO	NO		p	thylakoid-peripheral-lumenal-side	C	1.1.5.1 PS.lightreaction.other electron carrier (ox/red).plastocyanin
	AT1G77090.1	OEC23-like-5 Tat lTP TL29.8	YES	YES	NO	NO		p	thylakoid-peripheral-lumenal-side	C	1.1.1.2 PS.lightreaction.photosystem II.PSII polypeptide subunits
	AT3G60370.1	Isomerases	YES	NO	NO	NO		p	thylakoid-peripheral-lumenal-side	C	29.6 protein.folding
	AT4G24930.1	thylakoid lumen 17.9 kDa protein	YES	NO	NO	NO		p	thylakoid-peripheral-lumenal-side	C	35.2 not assigned.unknown
	AT5G52970.1	thylakoid lumen 15 kDa protein	YES	NO	NO	NO		p	thylakoid-peripheral-lumenal-side	C	35.1 not assigned.no ontology
	AT2G44920.1	thylakoid lumen pentapeptide repeat	YES	YES	NO	NO		p	thylakoid-peripheral-lumenal-side	C	26.54* misc. Pentapeptide repeat (PPR) unknown function
	AT5G13410.1	Isomerases TAT lTP	YES	NO	NO	NO		p	thylakoid-peripheral-lumenal-side	C	29.6 protein.folding
	AT3G01480.1	Tlp-40	YES	NO	NO	NO		p	thylakoid-peripheral-lumenal-side	C	29.6 protein.folding
	AT5G13120.1	peptidyl-prolyl isomerase protein - TLP21	YES	NO	YES	NO		p	thylakoid-peripheral-lumenal-side	C	29.6 protein.folding
	AT3G56650.1	OEC23-like-1	YES	NO	NO	NO		p	thylakoid-peripheral-lumenal-side	C	1.1.1.2 PS.lightreaction.photosystem II.PSII polypeptide subunits
	AT3G55330.1	OEC23-like-4 Tat lTP TL25.6	YES	NO	NO	NO		p	thylakoid-peripheral-lumenal-side	C	1.1.1.2 PS.lightreaction.photosystem II.PSII polypeptide subunits
	AT3G27925.1	DegP1 - HhoA homologue or DegQ	YES	NO	NO	NO		p	thylakoid-peripheral-lumenal-side	C	29.5.5 protein.degradation.serine protease
	AT1G54780.1	thylakoid lumen 18.3 kDa	YES	NO	YES	NO		p	thylakoid-peripheral-lumenal-side	C	35.2 not assigned.unknown
	AT4G09010.1	Putative Asc-perox lumen Tat ltp	YES	NO	YES	NO		p	thylakoid-peripheral-lumenal-side	C	21.2.1 redox.ascorbate and glutathione.ascorbate
	AT2G30790.1	psbP OEC23 Tat lTP	NO	NO	YES	NO		p	thylakoid-peripheral-lumenal-side	C	1.1.1.2 PS.lightreaction.photosystem II.PSII polypeptide subunits
	AT4G05180.1	psbQ OEC16-like Tat lTP	YES	YES	YES	NO		p	thylakoid-peripheral-lumenal-side	C	1.1.1.2 PS.lightreaction.photosystem II.PSII polypeptide subunits
	AT4G02530.1	thylakoid lumen protein TL16.5	YES	YES	YES	NO		p	thylakoid-peripheral-lumenal-side	C	35.2 not assigned.unknown
	AT4G21280.1	psbQ OEC16 Tat ltp	YES	YES	YES	NO		p	thylakoid-peripheral-lumenal-side	C	1.1.1.2 PS.lightreaction.photosystem II.PSII polypeptide subunits
	AT3G50820.1	psbO OEC33-like	YES	NO	YES	NO		p	thylakoid-peripheral-lumenal-side	C	1.1.1.2 PS.lightreaction.photosystem II.PSII polypeptide subunits
	AT5G23120.1	HCF136 Tat ltp	YES	YES	NO	NO		p	thylakoid-peripheral-lumenal-side	C	29.8 protein assembly and cofactor ligation
	AT5G66570.1	psbO OEC33	YES	YES	YES	NO		p	thylakoid-peripheral-lumenal-side	C	1.1.1.2 PS.lightreaction.photosystem II.PSII polypeptide subunits
	AT1G76450.1	OEC23-like-2 Tat lTP	YES	NO	NO	NO		p	thylakoid-peripheral-lumenal-side	C	1.1.1.2 PS.lightreaction.photosystem II.PSII polypeptide subunits
	AT4G15510.1	OEC23-like-3 Tat lTP	YES	NO	NO	NO		p	thylakoid-peripheral-lumenal-side	C	1.1.1.2 PS.lightreaction.photosystem II.PSII polypeptide subunits
	AT5G53490.1	peptapetide repeat TL17.4 (PPR)	YES	YES	NO	NO		p	thylakoid-peripheral-lumenal-side	C	26.54* misc. Pentapeptide repeat (PPR) unknown function
	AT3G15520.1	peptidyl-prolyl cis-trans isomerase TLP38	YES	NO	NO	NO		p	thylakoid-peripheral-lumenal-side	C	29.6 protein.folding
	AT4G03280.1	petC - Rieske Fe-S protein - LTP	YES	NO	YES	NO		p	thylakoid-peripheral-lumenal-side	C	1.1.3 PS.lightreaction.cytochrome b6/f
	AT1G06680.1	psbP OEC23 Tat lTP	YES	YES	YES	NO		p	thylakoid-peripheral-lumenal-side	C	1.1.1.2 PS.lightreaction.photosystem II.PSII polypeptide subunits
	AT4G39710.1	Isomerases	YES	NO	YES	NO		p	thylakoid-peripheral-lumenal-side	C	29.6 protein.folding
	AT2G39470.1	OEC23-like Tat lTP	YES	NO	NO	NO		p	thylakoid-peripheral-lumenal-side	C	1.1.1.2 PS.lightreaction.photosystem II.PSII polypeptide subunits
	AT1G14150.1	PsbQ domain TAT lTP	YES	NO	YES	NO		p	thylakoid-peripheral-lumenal-side	C	1.1.1.2 PS.lightreaction.photosystem II.PSII polypeptide subunits
	AT5G64040.1	psaN - TAT LTP -	YES	NO	YES	NO		p	thylakoid-peripheral-lumenal-side	C	1.1.2.2 PS.lightreaction.photosystem I.PSI polypeptide subunits
	AT1G03600.1	PSII Lumen Tat lTP	YES	YES	YES	NO		p	thylakoid-peripheral-lumenal-side	C	1.1.1.2 PS.lightreaction.photosystem II.PSII polypeptide subunits
	AT3G10060.1	Isomerases TAT lTP	YES	NO	NO	NO		p	thylakoid-peripheral-lumenal-side	C	29.6 protein.folding
	AT1G12250.1	thylakoid lumen pentapeptide repeat	YES	NO	YES	NO		p	thylakoid-peripheral-lumenal-side	C	26.54* misc. Pentapeptide repeat (PPR) unknown function
	AT3G24590.1	TPP-2 lumen	NO	NO	YES	NO		p	thylakoid-peripheral-lumenal-side	C	29.9* protein. processing
	AT1G18170.1	Isomerases TAT lTP	YES	NO	YES	NO		p	thylakoid-peripheral-lumenal-side	C	29.6 protein.folding
	AT1G10960.1	Fd1-leaf	NO	NO	NO	NO	YES	p	thylakoid-peripheral-stromal-side	C	1.1.5.2 PS.lightreaction.other electron carrier (ox/red).ferredoxin
	AT4G05390.1	FNR-3	NO	NO	NO	NO	YES	p	thylakoid-peripheral-stromal-side	C	1.1.7 PS.lightreaction.ferredoxin reductase
	AT3G26080.1	fibrillin (FIB3b)	NO	NO	NO	NO	YES	p	thylakoid-peripheral-stromal-side	C	26.31* misc. fibrillins
	AT1G03130.1	psaD-1 subunit II - stromal side-tight	NO	NO	NO	NO	YES	p	thylakoid-peripheral-stromal-side	C	1.1.2.2 PS.lightreaction.photosystem I.PSI polypeptide subunits
	AT5G54190.1	PORA - down regulated in light; high in Prolamellar body	NO	NO	NO	NO	YES	p	thylakoid-peripheral-stromal-side	C	19.14 tetrapyrrole synthesis.protochlorophyllide reductase
	AT2G45770.1	cpFtsY	YES	NO	NO	NO		p	thylakoid-peripheral-stromal-side	C	29.3.3 protein.targeting.chloroplast
	AT1G03680.1	thioredoxin m1	YES	YES	NO	NO		p	thylakoid-peripheral-stromal-side	C	21.1 redox.thioredoxin
	AT5G66190.1	FNR-1	YES	YES	YES	NO		p	thylakoid-peripheral-stromal-side	C	1.1.7 PS.lightreaction.ferredoxin reductase
	AT4G27440.1	PORB - constitutive expression - main protein in barley	YES	YES	NO	NO		p	thylakoid-peripheral-stromal-side	C	19.14 tetrapyrrole synthesis.protochlorophyllide reductase
	AT4G04640.1	CF1y - atpC	YES	NO	YES	NO		p	thylakoid-peripheral-stromal-side	C	1.1.4 PS.lightreaction.ATP synthase
	AT4G09650.1	CF1d - atpD	YES	YES	YES	NO		p	thylakoid-peripheral-stromal-side	C	1.1.4 PS.lightreaction.ATP synthase
	AT1G03630.1	PORC- ~constitutive expression	YES	YES	NO	NO		p	thylakoid-peripheral-stromal-side	C	19.14 tetrapyrrole synthesis.protochlorophyllide reductase
	AT1G55480.1	expressed protein	YES	YES	NO	NO		p	thylakoid-peripheral-stromal-side	C	35.2 not assigned.unknown
	AT3G25770.1	allene oxide cyclase family - (ERD12-2)	YES	YES	YES	NO		p	thylakoid-peripheral-stromal-side	C	17.7.1.4 hormone metabolism.jasmonate.synthesis-degradation.allene oxidase cyclase
	AT2G20260.1	psaE-2 subunit IV - stromal side	YES	YES	YES	NO		p	thylakoid-peripheral-stromal-side	C	1.1.2.2 PS.lightreaction.photosystem I.PSI polypeptide subunits
	AT4G02770.1	psaD-2 subunit II - stromal side-tight	YES	NO	YES	NO		p	thylakoid-peripheral-stromal-side	C	1.1.2.2 PS.lightreaction.photosystem I.PSI polypeptide subunits
	AT1G20020.1	FNR-2 (interaction with Cytf, maybe also AT5G66190)	YES	YES	YES	NO		p	thylakoid-peripheral-stromal-side	C	1.1.7 PS.lightreaction.ferredoxin reductase
	AT3G26070.1	fibrillin (FIB3a)	YES	NO	YES	NO		p	thylakoid-peripheral-stromal-side	C	26.31* misc. fibrillins
	AT4G28750.1	psaE-1 subunit IV - stromal side	YES	YES	YES	NO		p	thylakoid-peripheral-stromal-side	C	1.1.2.2 PS.lightreaction.photosystem I.PSI polypeptide subunits
	AT1G51110.1	fibrillin (FIB10)	YES	NO	NO	NO		p	thylakoid-peripheral-stromal-side	C	26.31* misc. fibrillins
	AT4G37200.1	HCF164 Fd like	NO	NO	YES	NO		p	thylakoid-peripheral-stromal-side	C	29.8 protein assembly and cofactor ligation
	AT1G15500.1	AtNTT2 - adenine nucleotide translocase	NO	NO	NO	NO	YES	p	envelope	M	34.8 transport.metabolite transporters at the envelope membrane
	AT4G37270.1	Cu-ATPase, HMA1	YES	NO	NO	NO		p	envelope	M	34.12 transport.metal
	AT4G00630.1	K+ efflux antiporter	YES	NO	NO	NO		p	envelope	M	34.15 transport.potassium
	AT4G25450.1	ABC transporter family	YES	NO	NO	NO		p	envelope	M	34.16 transport.ABC transporters and multidrug resistance systems
	AT5G02940.1	expressed protein	YES	NO	NO	NO		p	envelope	M	35.2 not assigned.unknown
	AT1G06870.1	TPP-1 lumen (LepB1 homologue)	NO	NO	NO	NO	YES	p	envelope; thylakoid-peripheral-lumenal-side	M	29.9* protein. processing
	AT5G46110.1	TPT - IEP30 = Phosphate/triose-phosphate translocator	YES	NO	NO	NO		p	envelope-inner-integral	M	34.8 transport.metabolite transporters at the envelope membrane
	AT4G37040.1	methionine aminopeptidase - MAP1D	NO	NO	NO	NO	YES	pd	mitochondria; plastid	M	29.5.7 protein.degradation.metalloprotease
	AT1G11870.1	Ser-tRNA synthetase - AtSRS (OVULE ABORTION 7) (dual targeted - cTP/mTP)	NO	NO	NO	NO	YES	pd	mitochondria; plastid stroma	M	29.1.11 protein.aa activation.serine-tRNA ligase
	AT3G46100.1	His-tRNA synthetase (ATHRS1) / histidine--tRNA ligase (dual targeted)	NO	NO	NO	NO	YES	pd	mitochondria; plastid stroma	M	29.1.21 protein.aa activation.histidine-tRNA ligase
	AT3G13490.1	tRNA synthetase class II (D, K and N) protein (dual targeted cTP/mTP)	YES	NO	NO	NO		pd	mitochondria; plastid stroma	M	29.1.6 protein.aa activation.lysine-tRNA ligase
	AT5G64050.1	glutamate-tRNA ligase family protein (dual target- cTP/mTP) (OVULE ABORTION 3)	YES	YES	NO	NO		pd	mitochondria; plastid stroma	M	19.1 tetrapyrrole synthesis.glu-tRNA synthetase; 29.1.17 protein.aa activation.glutamate-tRNA ligase
	AT1G60600.1	ABC4 - UbiA prenyltransferase (menA) (phylloquinone mutant)	NO	NO	NO	NO	YES	p	plastid	M	18.5 Co-factor and vitamine metabolism.folate & vitamine K
	AT3G21740.1	APO4 (ACCUMULATION OF PHOTOSYSTEM ONE 4)	NO	NO	NO	NO	YES	p	plastid	M	29.8 protein assembly and cofactor ligation
	AT3G24220.1	11,12 (11',12') 9-cis-epoxycarotenoid dioxygenase, putative (NCED6)	NO	NO	NO	NO	YES	p	plastid	M	16.1.4 secondary metabolism.isoprenoids.carotenoids
	AT5G19040.1	IPT5	NO	NO	NO	NO	YES	p	plastid	M	17.4.1 hormone metabolism.cytokinin.synthesis-degradation
	AT1G28140.1	expressed protein	YES	NO	NO	NO		p	plastid	M	9.7 mitochondrial electron transport / ATP synthesis.cytochrome c oxidase
	AT1G53120.1	RNA-binding S4 domain-containing protein	YES	NO	NO	NO		p	plastid	M	35.1.14 not assigned.no ontology.S RNA-binding domain-containing protein
	AT2G21370.1	xylulose kinase (DXK2)	YES	NO	NO	NO		p	plastid	M	3.7 minor CHO metabolism.sugar kinases
	AT2G33430.1	DAG protein - affects maturation rRNA -	YES	NO	NO	NO		p	plastid	M	27.1 RNA.processing
	AT3G46630.1	similar to defective chloroplasts and leaves protein ( DCL-like)	YES	NO	NO	NO		p	plastid	M	33.99 development.unspecified
	AT4G13550.1	lipase class 3 family protein	YES	NO	NO	NO		p	plastid	M	11.9.2.1 lipid metabolism.lipid degradation.lipases.triacylglycerol lipase
	AT5G59750.1	riboflavin biosynthesis protein, putativ, GTP cyclohydrolase II; 3,4-dihydroxy-2-butanone 4-phosphate synthase (DHBP synthase))	YES	NO	NO	NO		p	plastid	M	18.3.1 Co-factor and vitamine metabolism.riboflavin.GTP cyclohydrolase II
	AT5G64380.1	fructose-bisphosphatase	YES	NO	NO	NO		p	plastid	M	1.3.7 PS.calvin cyle.FBPase
	AT5G66550.1	Maf family protein	YES	NO	NO	NO		p	plastid	M	35.1 not assigned.no ontology
	AT1G67700.1	expressed protein	YES	YES	NO	NO		p	plastid	M	35.2 not assigned.unknown
	AT4G01690.1	protoporphyrinogen oxidase (PPO) (PPOX)	YES	NO	NO	NO		p	plastid	M	19.9 tetrapyrrole synthesis.protoporphyrin IX oxidase
	AT1G48420.1	putative ACC deaminase (Pyridoxal-phosphate dependent enzyme domain)	YES	NO	NO	NO		p	plastid	M	17.5.1 hormone metabolism.ethylene.synthesis-degradation
	AT2G42540.1	cold-regulated protein (cor15a)	NO	NO	NO	NO	YES	p	plastid stroma	M	20.2.2 stress.abiotic.cold
	AT2G47910.1	chlororespiratory reduction 6 (CRR6) - needed for thylakoid NDH complex accumulation	YES	YES	NO	NO		p	plastid stroma	M	29.8 protein assembly and cofactor ligation
	AT1G74260.1	AIR synthase related protein	YES	NO	NO	NO		p	plastid stroma	M	23.1.2.4 nucleotide metabolism.synthesis.purine.FGAR amidotransferase
	AT2G31670.1	expressed protein	YES	YES	NO	NO		p	plastid stroma	M	35.2 not assigned.unknown
	AT5G17530.1	phosphoglucosamine mutase	YES	YES	NO	NO		p	plastid stroma	M	4.2 glycolysis.PGM
	AT1G48520.1	Glu-tRNA(Gln) amidotransferase subunit B (GATB or GLU-ADT subunit B)	YES	YES	NO	NO		p	plastid stroma	M	19.1 tetrapyrrole synthesis.glu-tRNA synthetase
	AT2G02500.1	4-Diphosphocytidyl-2C-methyl-D-erythritol synthase (ISPD) - mevalonate-independent	YES	YES	NO	NO		p	plastid stroma	M	16.1.1.3 secondary metabolism.isoprenoids.non-mevalonate pathway.CMS
	AT1G31180.1	3-isopropylmalate dehydrogenase-3, chloroplast,	YES	YES	NO	NO		p	plastid stroma	M	13.1.4.4.3 amino acid metabolism.synthesis.branched chain group.leucine specific.3-isopropylmalate dehydrogenase
	AT1G78140.1	Ubie_methyltransferase-related similar to delta(24)-sterol C-methyltransferase	NO	NO	NO	YES		p	plastoglobules	M	35.1 not assigned.no ontology
	AT5G05200.1	ABC1 kinase - AB1K4 (DUF772; MecA_N)	NO	NO	NO	YES		p	plastoglobules	M	26.56* misc.ABC1k family
	AT3G12345.1	expressed protein	YES	NO	YES	NO		p	thylakoid	M	35.2 not assigned.unknown
	AT3G43540.1	expressed protein slr1699 - PIR:S75306	YES	NO	NO	NO		p	thylakoid	M	35.2 not assigned.unknown
	AT4G37925.1	NDH M	NO	NO	YES	NO		p	thylakoid	M	1.1.6 PS.lightreaction.NADH DH
	AT3G08920.1	rhodanese-like domain-containing protein	YES	NO	NO	NO		p	thylakoid	M	26.23 misc.rhodanese
	AT4G39960.1	DnaJ domain family	YES	NO	NO	NO		p	thylakoid	M	26.29* misc. DnaJ domain with unknown function
	AT2G21970.1	Sep2 or Lil5	NO	NO	NO	NO	YES	p	thylakoid-integral	M	1.1.8* light stress chlorophyll binding
	AT5G54290.1	CcdA - thiol Disulfide transporter - cytf assembly	NO	NO	NO	NO	YES	p	thylakoid-integral	M	29.8 protein assembly and cofactor ligation
	AT1G45474.1	LHCI-5 - new	YES	NO	NO	NO		p	thylakoid-integral	M	1.1.2.1 PS.lightreaction.photosystem I.LHC-I
	AT1G15820.1	LHCII-6 - CP24	YES	NO	YES	NO		p	thylakoid-integral	M	1.1.1.1 PS.lightreaction.photosystem II.LHC-II
	AT3G06510.1	glycosyl hydrolase family 1	YES	NO	NO	NO		p	envelope	S	26.3 misc.gluco-, galacto- and mannosidases
	AT1G24490.1	artemis- ALBINO3 -related	NO	NO	NO	NO	YES	p	envelope-inner-integral	S	31.2.5 cell.division.plastid
	AT5G16180.1	CRS1 - splice factor group II intron	NO	NO	NO	NO	YES	p	plastid	S	27.1.1 RNA.processing.splicing
	AT1G21350.1	expressed protein	YES	NO	NO	NO		p	plastid	S	35.2 not assigned.unknown
	AT1G64190.1	6-phosphogluconate dehydrogenase-1	YES	NO	NO	NO		p	plastid	S	7.1.3 OPP.oxidative PP.6-phosphogluconate dehydrogenase
	AT5G17870.1	PSRP-6 associates with 50S	NO	NO	NO	NO	YES	p	plastid stroma	S	29.2.1.99 protein.synthesis.chloroplast/mito.unknown
	AT3G14210.1	GDSL-like Lipase/Acylhydrolase - very abundant	YES	NO	NO	NO				S	16.5.1 secondary metabolism.sulfur-containing.glucosinolates
	AT1G04410.1	malate dehydrogenase, cytosolic,	YES	YES	NO	NO			cytosol	_	8.2.9 TCA / org. transformation.other organic acid transformaitons.cyt MDH
	AT5G02500.1	HSP70-1 (HSC70-1) (not plastid) - very abundant	YES	NO	NO	NO			cytosol	_	29.6 protein.folding
	AT3G52930.1	Aldolase	YES	NO	NO	NO			cytosol	_	4.7 glycolysis.aldolase
	AT1G27450.1	Adenine phosphoribosyltransferase-1 (APT1)	YES	YES	NO	NO			cytosol	C	23.3.1.1 nucleotide metabolism.salvage.phosphoribosyltransferases.aprt
	AT1G19570.1	dehydroascorbate reductase-1 (DHAR1) - monomeric-cytosol	YES	YES	NO	NO			cytosol	_	21.2.1 redox.ascorbate and glutathione.ascorbate
	AT5G58270.1	ABC transporter family protein - possibly also envelope	YES	NO	NO	NO			mitochondria	M	34.16 transport.ABC transporters and multidrug resistance systems
	AT5G08670.1	H+-transporting ATP synthase beta chain	YES	NO	NO	NO			mitochondria	M	9.9 mitochondrial electron transport / ATP synthesis.F1-ATPase
	AT1G79230.1	mercaptopyruvate/thiosulfate sulfurtransferase (Mst1/Rdh1) or AtStr1	YES	NO	NO	NO			mitochondria	C	13.2.5.3 amino acid metabolism.degradation.serine-glycine-cysteine group.cysteine
	AT1G53240.1	malate dehydrogenase [NAD], mitochondrial	YES	NO	NO	NO			mitochondria	M	8.1.9 TCA / org. transformation.TCA.malate DH
	AT4G34450.1	Adaptin motif - putative coatomer gamma-2 subunit/ gamma-2 coat protein -	YES	NO	NO	NO			not plastid	_	31.4 cell. vesicle transport
	AT2G30860.1	glutathione S-transferase (AtGST9)	YES	YES	NO	NO			not plastid	_	26.9 misc.glutathione S transferases
	AT5G09660.1	malate dehydrogenase, glyoxysomal/peroxisomal (PMDH2) - very abundant	YES	YES	NO	NO			not plastid	_	6.3 gluconeogenesis.Malate DH
	AT1G20620.1	catalase 3 (CAT3)	YES	YES	NO	NO			not plastid	_	21.6 redox.dismutases and catalases
	AT5G25980.1	myrosinase or thioglucoside glucohydrolase 2 (TGG2)	YES	NO	NO	NO			not plastid	S	16.5.1 secondary metabolism.sulfur-containing.glucosinolates
	AT5G26000.1	thioglucoside glucohydrolase 1 (TGG1) (myrosinase)	YES	YES	NO	NO			not plastid	S	16.5.1 secondary metabolism.sulfur-containing.glucosinolates
	AT4G02520.1	glutathione transferase Phi (ATGSTF2) - very abundant	YES	YES	NO	NO			not plastid	_	26.9 misc.glutathione S transferases
	AT5G11670.1	NADP dependent malic enzyme 2 (ATNADP-ME2) - very abundant	YES	NO	NO	NO			not plastid	_	8.2.10 TCA / org. transformation.other organic acid transformaitons.malic
	AT1G13440.1	glyceraldehyde-3-phosphate dehydrogenase C-2 (GAPC-2)	YES	NO	NO	NO			not plastid	_	4.9 glycolysis.glyceraldehyde 3-phosphate dehydrogenase
	AT1G56070.1	elongation factor 2, EF-2	NO	YES	NO	NO			not plastid	_	29.2.4 protein.synthesis.elongation
	AT1G78370.1	glutathione transferase (Tau class) - ATGSTU20	YES	NO	NO	NO			not plastid	M	26.9 misc.glutathione S transferases
	AT1G78380.1	putative glutathione transferase	YES	NO	NO	NO			not plastid	_	26.9 misc.glutathione S transferases
	AT5G17920.1	5-methyltetrahydropteroyltriglutamate--homocysteine S-methyltransferase - ATCIMS - very abundant	YES	YES	NO	NO			not plastid	_	13.1.3.4 amino acid metabolism.synthesis.aspartate family.methionine
	AT2G30870.1	glutathione transferase -Phi class (ATGSTF10) - very abundant	YES	NO	NO	NO			not plastid	S	26.9 misc.glutathione S transferases
	AT1G08110.1	glyoxalase I, putative (lactoylglutathione lyase) - very abundant	YES	NO	NO	NO			not plastid	_	13.2.3.2 amino acid metabolism.degradation.aspartate family.threonine; 24.2 Biodegradation of Xenobiotics.lactoylglutathione lyase
	AT3G55440.1	triosephosphate isomerase-2 (TPI-2)	YES	YES	NO	NO			not plastid	_	4.8 glycolysis.TPI
	AT5G41670.1	6-phosphogluconate dehydrogenase-2 - vey abundant	YES	NO	NO	NO			not plastid	S	7.1.3 OPP.oxidative PP.6-phosphogluconate dehydrogenase
	AT1G68010.1	glycerate dehydrogenase / NADH-dependent hydroxypyruvate reductase (HPR)	YES	NO	NO	NO			peroxisome	_	1.2.6 PS.photorespiration.hydroxypyruvate reductase; 13.2.5 amino acid metabolism.degradation.serine-glycine-cysteine group
	AT3G14415.1	glycolate oxidase-1 (GOX-1)	YES	NO	NO	NO			peroxisome	_	1.2.2 PS.photorespiration.glycolate oxydase
	AT2G13360.1	alanine-glyoxylate aminotransferase (AGT1)	YES	NO	NO	NO			peroxisome	_	1.2.3 PS.aminotransferases peroxisomal
	AT3G14420.1	glycolate oxidase-2 (GOX-2)	YES	NO	NO	NO			peroxisome	_	1.2.2 PS.photorespiration.glycolate oxydase
